# Supplementary material
Source: MDPI journal article supplement (https://www.mdpi.com/2071-1050/16/9/3877)
Supplement: s1 [file s1]

| <b>S1. The Questionnaire's Template</b> |        |                                                                                                                                                                                           |                     |
|-----------------------------------------|--------|-------------------------------------------------------------------------------------------------------------------------------------------------------------------------------------------|---------------------|
| $X(n)$                                  | $Q(n)$ | Questions                                                                                                                                                                                 | Responses codes     |
| X(1)                                    | Q1     | I am sensitive to social problems associated with deterioration of natural environment.                                                                                                   | 1, 2, 3, 4, 5, 6, 7 |
|                                         | Q2     | I know the concept of sustainable marketing mix development.                                                                                                                              | 1, 2, 3, 4, 5, 6, 7 |
|                                         | Q3     | I have professional experience in pro ecological and pro social areas.                                                                                                                    | 1, 2, 3, 4, 5, 6, 7 |
| X(2)                                    | Q1     | The company designs products taking into account their impact on the state of the environment.                                                                                            | 1, 2, 3, 4, 5, 6, 7 |
|                                         | Q2     | The company consciously saves energy, water and fuels needed for production.                                                                                                              | 1, 2, 3, 4, 5, 6, 7 |
|                                         | Q3     | The company eliminates or limits the emission of harmful gases, dusts, fragrances, industrial wastewater, and production waste.                                                           | 1, 2, 3, 4, 5, 6, 7 |
|                                         | Q4     | The company uses renewable sources.                                                                                                                                                       | 1, 2, 3, 4, 5, 6, 7 |
|                                         | Q5     | The company consciously eliminates or limits the types and quantities of materials used to make packaging, e.g. film, paper, plastic, aluminum, etc.                                      | 1, 2, 3, 4, 5, 6, 7 |
|                                         | Q6     | The enterprise uses packaging made from raw materials wholly or partly recycled.                                                                                                          | 1, 2, 3, 4, 5, 6, 7 |
|                                         | Q7     | The company makes modifications to create ecological packaging.                                                                                                                           | 1, 2, 3, 4, 5, 6, 7 |
| X(3)                                    | Q1     | The company designs products taking into account their impact on consumer health.                                                                                                         | 1, 2, 3, 4, 5, 6, 7 |
|                                         | Q2     | The enterprise knowingly eliminates or limits the content of such raw materials as white sugar, chemical preservatives, flavor enhancers, artificial colors, trans fats.                  | 1, 2, 3, 4, 5, 6, 7 |
| X(4)                                    | Q1     | The company effectively manages human capital while respecting employee rights.                                                                                                           | 1, 2, 3, 4, 5, 6, 7 |
|                                         | Q2     | The company provides its employees with safe and healthy working conditions.                                                                                                              | 1, 2, 3, 4, 5, 6, 7 |
|                                         | Q3     | The company ensures fair remuneration.                                                                                                                                                    | 1, 2, 3, 4, 5, 6, 7 |
| X(5)                                    | Q1     | The enterprise includes in the prices of products the costs of purchasing raw materials, energy and materials for production.                                                             | 1, 2, 3, 4, 5, 6, 7 |
|                                         | Q2     | The enterprise includes transport and storage costs in product prices.                                                                                                                    | 1, 2, 3, 4, 5, 6, 7 |
|                                         | Q3     | The enterprise includes employee costs in product prices e.g. ensuring health and safety, social security.                                                                                | 1, 2, 3, 4, 5, 6, 7 |
|                                         | Q4     | The enterprise includes in the prices of products the costs associated with the elimination or reduction of harmful gases, dusts, fragrances, industrial wastewater and production waste. | 1, 2, 3, 4, 5, 6, 7 |

## Supplementary S1: QuestionnaireTemplate

|                                                                                                                                                    |     |                                                                                                                                           |                     |
|----------------------------------------------------------------------------------------------------------------------------------------------------|-----|-------------------------------------------------------------------------------------------------------------------------------------------|---------------------|
|                                                                                                                                                    | Q5  | The company includes in the prices of products the costs of recycling packaging from consumed food products.                              | 1, 2, 3, 4, 5, 6, 7 |
|                                                                                                                                                    | Q6  | The company includes in the prices of products the costs of treatment related to the consumption of food products.                        | 1, 2, 3, 4, 5, 6, 7 |
| X(6)                                                                                                                                               | Q1  | The company uses environmentally friendly means of transport e.g. hybrid and electric, and LPG fueled cars.                               | 1, 2, 3, 4, 5, 6, 7 |
|                                                                                                                                                    | Q2  | The company uses environmentally friendly resources and devices.                                                                          | 1, 2, 3, 4, 5, 6, 7 |
|                                                                                                                                                    | Q3  | The company is withdrawing transport with high emissions and noise.                                                                       | 1, 2, 3, 4, 5, 6, 7 |
|                                                                                                                                                    | Q4  | The company optimizes the delivery of products by choosing the right routes (shorter, faster routes).                                     | 1, 2, 3, 4, 5, 6, 7 |
|                                                                                                                                                    | Q5  | The company combines deliveries to several recipients simultaneously.                                                                     | 1, 2, 3, 4, 5, 6, 7 |
|                                                                                                                                                    | Q6  | The company adjusts the means of transport to the amount of transported goods.                                                            | 1, 2, 3, 4, 5, 6, 7 |
|                                                                                                                                                    | Q7  | The company makes the most of transport space by properly arranging products in means of transport.                                       | 1, 2, 3, 4, 5, 6, 7 |
|                                                                                                                                                    | Q8  | The company monitors and controls the working time of drivers to avoid road accidents.                                                    | 1, 2, 3, 4, 5, 6, 7 |
|                                                                                                                                                    | Q9  | The company optimizes distribution channels by reducing intermediaries involved in distribution processes.                                | 1, 2, 3, 4, 5, 6, 7 |
|                                                                                                                                                    | Q10 | The company selects intermediaries in terms of ecological and social sensitivity.                                                         | 1, 2, 3, 4, 5, 6, 7 |
| X(7)                                                                                                                                               | Q1  | The content of promotional messages is characterized by transparency and credibility.                                                     | 1, 2, 3, 4, 5, 6, 7 |
|                                                                                                                                                    | Q2  | The content of promotional messages is educational.                                                                                       | 1, 2, 3, 4, 5, 6, 7 |
|                                                                                                                                                    | Q3  | The content of promotional messages emphasize the pro ecological and pro social features of the products.                                 | 1, 2, 3, 4, 5, 6, 7 |
|                                                                                                                                                    | Q4  | The content of promotional messages inform consumers about the company's ecological and social activity.                                  | 1, 2, 3, 4, 5, 6, 7 |
|                                                                                                                                                    | Q5  | The content of promotional messages encourages the purchase of pro ecological and pro social products manufactured by the company.        | 1, 2, 3, 4, 5, 6, 7 |
| X(8)                                                                                                                                               | Q1  | The company intends to abandon or limit the production of products which have a negative impact on the environment and consumers health.  | 1, 2, 3, 4, 5, 6, 7 |
|                                                                                                                                                    | Q2  | The company intends to include in its product prices the real environmental and social costs associated with the its products production. | 1, 2, 3, 4, 5, 6, 7 |
|                                                                                                                                                    | Q3  | The company intends to reduce the negative impact of the its products distribution to society and natural environment.                    | 1, 2, 3, 4, 5, 6, 7 |
|                                                                                                                                                    | Q4  | The company intends to use balanced media, forms of communication, and the content of promotional messages.                               | 1, 2, 3, 4, 5, 6, 7 |
| Responses options with codes:<br>(1)-definitely no, (2)-no, (3)-rather no, (4)-neither no; nor yes,<br>(5)-rather yes, (6)-yes, (7)-definitely yes |     |                                                                                                                                           |                     |

Supplementary S1: QuestionnaireTemplate

| PARTICULARS                                             |                                                                                                                                                                                                                                                                                                                                                                                                                                                                                                                                                                                                                                                    |
|---------------------------------------------------------|----------------------------------------------------------------------------------------------------------------------------------------------------------------------------------------------------------------------------------------------------------------------------------------------------------------------------------------------------------------------------------------------------------------------------------------------------------------------------------------------------------------------------------------------------------------------------------------------------------------------------------------------------|
| <i>Legal form of the business</i>                       | <input type="checkbox"/> Public limited company<br><input type="checkbox"/> Limited liability company<br><input type="checkbox"/> Limited joint-stock partnership<br><input type="checkbox"/> Limited partnership<br><input type="checkbox"/> Limited liability partnership<br><input type="checkbox"/> General partnership<br><input type="checkbox"/> Civil law partnership<br><input type="checkbox"/> Sole proprietorship<br><input type="checkbox"/> Cooperative company                                                                                                                                                                      |
| <i>Name of the province where the business operates</i> | <input type="checkbox"/> Lower Silesia<br><input type="checkbox"/> Kuyavian-Pomeranian<br><input type="checkbox"/> Lublin<br><input type="checkbox"/> Lubusz<br><input type="checkbox"/> Lodz<br><input type="checkbox"/> Lesser Poland<br><input type="checkbox"/> Mazovian<br><input type="checkbox"/> Opole<br><input type="checkbox"/> Subcarpathian<br><input type="checkbox"/> Podlasie<br><input type="checkbox"/> Pomeranian<br><input type="checkbox"/> Silesian<br><input type="checkbox"/> Holy Cross<br><input type="checkbox"/> Varmia-Mazuria<br><input type="checkbox"/> Greater Poland<br><input type="checkbox"/> West-Pomeranian |
| <i>The company's representative</i>                     |                                                                                                                                                                                                                                                                                                                                                                                                                                                                                                                                                                                                                                                    |
| <i>Professional position</i>                            | <input type="checkbox"/> Business's Manager<br><input type="checkbox"/> Entrepreneur Proprietor                                                                                                                                                                                                                                                                                                                                                                                                                                                                                                                                                    |
| <i>Professional experience in years</i>                 | <input type="checkbox"/> 0–6<br><input type="checkbox"/> 7–12<br><input type="checkbox"/> 13–18<br><input type="checkbox"/> 19–24<br><input type="checkbox"/> 25 & more                                                                                                                                                                                                                                                                                                                                                                                                                                                                            |
| <i>The company's employment</i>                         |                                                                                                                                                                                                                                                                                                                                                                                                                                                                                                                                                                                                                                                    |
| <i>The firm's size class</i>                            | <input type="checkbox"/> Micro Business (1-10 employees)<br><input type="checkbox"/> Small Firm (11-50 employees)<br><input type="checkbox"/> Medium Company (51-250 employees)<br><input type="checkbox"/> Large Enterprise (more than 250 employees)                                                                                                                                                                                                                                                                                                                                                                                             |

Supplementary S2: PopID-DataTable

| NO. | SECTOR | REGON     | ZIP CODE | PROVINCE            | COUNTY              | COMMUNE           | CITY                 |
|-----|--------|-----------|----------|---------------------|---------------------|-------------------|----------------------|
| 1   | 1039Z  | 061092718 | 24-320   | Lublin              | opolski             | Poniatowa         | Poniatowa            |
| 2   | 1039Z  | 365889551 | 63-500   | Greater Poland      | ostrzeszowski       | Ostrzeszów        | Ostrzeszów           |
| 3   | 1039Z  | 368299531 | 81-404   | Pomeranian          | Gdynia              | Gdynia            | Gdynia               |
| 4   | 1039Z  | 730352685 | 98-355   | Lodz                | pajęczański         | Działoszyn        | Działoszyn           |
| 5   | 1039Z  | 011212185 | 02-010   | Mazovian            | Warszawa            | Śródmieście       | Warszawa             |
| 6   | 1039Z  | 221660981 | 76-200   | Pomeranian          | Słupsk              | Słupsk            | Słupsk               |
| 7   | 1039Z  | 101411831 | 98-354   | Lodz                | pajęczański         | Siemkowice        | Katarzynopole        |
| 8   | 1039Z  | 240912821 | 44-113   | Silesian            | Gliwice             | Gliwice           | Gliwice              |
| 9   | 1039Z  | 146412229 | 00-695   | Mazovian            | Warszawa            | Śródmieście       | Warszawa             |
| 10  | 1039Z  | 532255337 | 46-200   | Opole               | kluczborski         | Kluczbork         | Kluczbork            |
| 11  | 1039Z  | 363698539 | 33-100   | Lesser Poland       | Tarnów              | Tarnów            | Tarnów               |
| 12  | 1039Z  | 022141427 | 55-114   | Lower Silesia       | trzebnicki          | Wisznia Mała      | Krynitzno            |
| 13  | 1039Z  | 146754102 | 00-695   | Mazovian            | Warszawa            | Śródmieście       | Warszawa             |
| 14  | 1039Z  | 672025407 | 05-640   | Mazovian            | grójecki            | Mogielnica        | Górki-Izabelin       |
| 15  | 1039Z  | 366736690 | 30-148   | Lesser Poland       | Kraków              | Kraków-Krowodrza  | Kraków               |
| 16  | 1039Z  | 369094699 | 33-200   | Lesser Poland       | dąbrowski           | Dąbrowa Tarnowska | Dąbrowa Tarnowska    |
| 17  | 1039Z  | 750439867 | 96-321   | Mazovian            | grodziski           | Żabia Wola        | Bieniewiec           |
| 18  | 1039Z  | 368904541 | 55-095   | Lower Silesia       | wrocławski          | Długołęka         | Stępin               |
| 19  | 1039Z  | 017266727 | 03-083   | Mazovian            | Warszawa            | Białołęka         | Warszawa             |
| 20  | 1039Z  | 230482848 | 58-520   | Lower Silesia       | karkonoski          | Janowice Wielkie  | Mniszków             |
| 21  | 1039Z  | 367760471 | 05-480   | Mazovian            | otwocki             | Karczew           | Glinki               |
| 22  | 1039Z  | 369357800 | 05-870   | Mazovian            | warszawski zachodni | Ożarów Mazowiecki | Święcice             |
| 23  | 1039Z  | 369148700 | 27-580   | Holy Cross          | opatowski           | Sadowie           | Jacentów             |
| 24  | 1039Z  | 142738721 | 00-803   | Mazovian            | Warszawa            | Wola              | Warszawa             |
| 25  | 1039Z  | 191505418 | 80-335   | Pomeranian          | Gdańsk              | Gdańsk            | Gdańsk               |
| 26  | 1039Z  | 367555630 | 26-670   | Mazovian            | radomski            | Pionki            | Działki Suskowolskie |
| 27  | 1039Z  | 340881744 | 86-300   | Kuyavian-Pomeranian | Grudziądz           | Grudziądz         | Grudziądz            |
| 28  | 1039Z  | 870434182 | 87-100   | Kuyavian-Pomeranian | Toruń               | Toruń             | Toruń                |
| 29  | 1039Z  | 368376013 | 86-010   | Kuyavian-Pomeranian | bydgoski            | Koronowo          | Koronowo             |
| 30  | 1039Z  | 340137141 | 88-324   | Kuyavian-Pomeranian | mogileński          | Jeziora Wielkie   | Rzeszyn              |
| 31  | 1039Z  | 411435010 | 64-100   | Greater Poland      | Leszno              | Leszno            | Leszno               |
| 32  | 1039Z  | 368336887 | 87-811   | Kuyavian-Pomeranian | włocławski          | Fabianki          | Szpetal Górny        |



Supplementary S2: PopID-DataTable

|    |       |           |        |                     |                         |                    |                               |
|----|-------|-----------|--------|---------------------|-------------------------|--------------------|-------------------------------|
| 33 | 1039Z | 360137438 | 86-300 | Kuyavian-Pomeranian | Grudziądz               | Grudziądz          | Grudziądz                     |
| 34 | 1039Z | 300583334 | 64-730 | Greater Poland      | czarnkowsko-trzcianecki | Wieleń             | Rosko                         |
| 35 | 1039Z | 430423101 | 21-345 | Lublin              | radzyński               | Borki              | Nowiny                        |
| 36 | 1039Z | 360023255 | 23-425 | Lublin              | biłgorajski             | Biszczka           | Bukowina                      |
| 37 | 1039Z | 360279983 | 62-436 | Greater Poland      | śłupecki                | Orchowo            | Orchowo                       |
| 38 | 1039Z | 381778477 | 62-800 | Greater Poland      | kaliski                 | Żelazków           | Niedźwiady                    |
| 39 | 1039Z | 060006183 | 24-170 | Lublin              | puławski                | Kurów              | Klementowice                  |
| 40 | 1039Z | 431266365 | 23-225 | Lublin              | kraśnicki               | Szastarka          | Brzozówka                     |
| 41 | 1039Z | 060621362 | 37-300 | Subcarpathian       | leżajski                | Leżajsk            | Stare Miasto                  |
| 42 | 1039Z | 100326595 | 96-232 | Lodz                | rawski                  | Regnów             | Annosław                      |
| 43 | 1039Z | 367836518 | 62-030 | Greater Poland      | poznański               | Luboń              | Luboń                         |
| 44 | 1039Z | 008122323 | 78-500 | West-Pomeranian     | drawski                 | Drawsko Pomeranian | Rydzewo                       |
| 45 | 1039Z | 430520212 | 23-107 | Lublin              | lubelski                | Strzyżewice        | Osmolice Pierwsze             |
| 46 | 1039Z | 141542861 | 07310  | Mazovian            | ostrowski               | Ostrów Mazowiecka  | Komorowo                      |
| 47 | 1039Z | 000474028 | 21-500 | Lublin              | bialski                 | Biała Podlaska     | Cicibór Duży                  |
| 48 | 1039Z | 670044694 | 26-415 | Mazovian            | przysuski               | Klwów              | Głuszyna                      |
| 49 | 1039Z | 390621085 | 59-330 | Lower Silesia       | lubiński                | Ścinawa            | Ścinawa                       |
| 50 | 1039Z | 060241145 | 23-300 | Lublin              | janowski                | Janów Lubelski     | Borownica                     |
| 51 | 1039Z | 390649416 | 59-223 | Lower Silesia       | legnicki                | Krotoszyce         | Warmętowice Sienkiewiczowskie |
| 52 | 1039Z | 950269420 | 22-437 | Lublin              | zamojski                | Łabunie            | Łabuńki Drugie                |
| 53 | 1039Z | 550666776 | 05205  | Mazovian            | wołomiński              | Klembów            | Rasztów                       |
| 54 | 1039Z | 430310242 | 23-250 | Lublin              | kraśnicki               | Urzędów            | Boby-Kolonia                  |
| 55 | 1039Z | 061463304 | 24-130 | Lublin              | puławski                | Końskowola         | Końskowola                    |
| 56 | 1039Z | 430456193 | 24-310 | Lublin              | opolski                 | Karczmiska         | Karczmiska Pierwsze           |
| 57 | 1039Z | 142879083 | 87-600 | Kuyavian-Pomeranian | lipnowski               | Lipno              | Lipno                         |
| 58 | 1039Z | 910028178 | 87-600 | Kuyavian-Pomeranian | lipnowski               | Lipno              | Lipno                         |
| 59 | 1039Z | 230174816 | 59-220 | Lower Silesia       | Legnica                 | Legnica            | Legnica                       |
| 60 | 1039Z | 060253042 | 24-350 | Lublin              | opolski                 | Chodel             | Granice                       |
| 61 | 1039Z | 890178303 | 57-220 | Lower Silesia       | ząbkowicki              | Ziębice            | Ziębice                       |
| 62 | 1039Z | 690398784 | 36-100 | Subcarpathian       | kolbuszowski            | Kolbuszowa         | Kolbuszowa                    |
| 63 | 1039Z | 370496626 | 38-242 | Subcarpathian       | jasielski               | Skotyszyn          | Lisów                         |
| 64 | 1039Z | 650071614 | 37-700 | Subcarpathian       | przemyski               | Krasiczyn          | Prątkowce                     |
| 65 | 1039Z | 050697019 | 16-070 | Podlasie            | białostocki             | Choroszcz          | Śliwno                        |

## Supplementary S2: PopID-DataTable

|    |       |           |        |                     |                 |                      |                  |
|----|-------|-----------|--------|---------------------|-----------------|----------------------|------------------|
| 66 | 1039Z | 200167461 | 17-300 | Podlasie            | siemiatycki     | Siemiatycze          | Siemiatycze      |
| 67 | 1039Z | 140376308 | 05505  | Mazovian            | piaseczyński    | Prażmów              | Prażmów          |
| 68 | 1039Z | 050283861 | 17-300 | Podlasie            | siemiatycki     | Siemiatycze          | Słochy AnnOpole  |
| 69 | 1039Z | 002338996 | 17-300 | Podlasie            | siemiatycki     | Siemiatycze          | Siemiatycze      |
| 70 | 1039Z | 450087567 | 18-400 | Podlasie            | łomża           | Łomża                | Łomża            |
| 71 | 1039Z | 130949657 | 09131  | Mazovian            | płoński         | Joniec               | Nowa Wrona       |
| 72 | 1039Z | 610222560 | 96-521 | Mazovian            | sochaczewski    | Itów                 | Wisowa           |
| 73 | 1039Z | 050003152 | 17-315 | Podlasie            | siemiatycki     | Grodzisk             | Koryciny         |
| 74 | 1039Z | 340877688 | 89-200 | Kuyavian-Pomeranian | nakielski       | Szubin               | Szubin           |
| 75 | 1039Z | 200865432 | 17-300 | Podlasie            | siemiatycki     | Siemiatycze          | Siemiatycze      |
| 76 | 1039Z | 146725483 | 02304  | Mazovian            | Warszawa        | Ochota               | Warszawa         |
| 77 | 1039Z | 634467477 | 67-120 | Lubusz              | nowosolski      | Kożuchów             | Kożuchów         |
| 78 | 1039Z | 146794975 | 03509  | Mazovian            | Warszawa        | Targówek             | Warszawa         |
| 79 | 1039Z | 050692743 | 15-605 | Podlasie            | białostocki     | Juchnowiec Kościelny | Solniczki        |
| 80 | 1039Z | 390651420 | 59-220 | Lower Silesia       | Legnica         | Legnica              | Legnica          |
| 81 | 1039Z | 750109124 | 96-208 | Lodz                | rawski          | Sadkowice            | Kłopotczyn       |
| 82 | 1039Z | 230526422 | 58-560 | Lower Silesia       | Jelenia Góra    | Jelenia Góra         | Jelenia Góra     |
| 83 | 1039Z | 670973117 | 05660  | Mazovian            | grójecki        | Warka                | Warka            |
| 84 | 1039Z | 192823215 | 81-585 | Pomeranian          | Gdynia          | Gdynia               | Gdynia           |
| 85 | 1039Z | 590031006 | 95-080 | Lodz                | łódzki wschodni | Tuszyn               | Górki Małe       |
| 86 | 1039Z | 710358781 | 05300  | Mazovian            | miński          | Mińsk Mazowiecki     | Mińsk Mazowiecki |
| 87 | 1039Z | 006225480 | 03687  | Mazovian            | Warszawa        | Targówek             | Warszawa         |
| 88 | 1039Z | 670019265 | 26-811 | Mazovian            | białobrzegi     | Wyśmierzyce          | Wyśmierzyce      |
| 89 | 1039Z | 140176880 | 05800  | Mazovian            | pruszkowski     | Pruszków             | Pruszków         |
| 90 | 1039Z | 050682450 | 17-300 | Podlasie            | siemiatycki     | Siemiatycze          | Siemiatycze      |
| 91 | 1039Z | 002351324 | 15-501 | Podlasie            | Białystok       | Białystok            | Białystok        |
| 92 | 1039Z | 570134785 | 78-320 | West-Pomeranian     | świdwiński      | Połczyn-Zdrój        | Dziwogóra        |
| 93 | 1039Z | 410313457 | 56-200 | Lower Silesia       | górowski        | Góra                 | Góra             |
| 94 | 1039Z | 970512909 | 59-950 | Lower Silesia       | zgorzelecki     | Węgliniec            | Ruszów           |
| 95 | 1039Z | 016009282 | 26-340 | Lodz                | opoczyński      | Drzewica             | Radzice Duże     |
| 96 | 1039Z | 100297238 | 98-320 | Lodz                | wieluński       | Osjaków              | Drobnice         |
| 97 | 1039Z | 870508779 | 87-320 | Kuyavian-Pomeranian | brodnicki       | Górzno               | Miesięczkowo     |
| 98 | 1039Z | 771443602 | 89-632 | Pomeranian          | chojnicki       | Brusy                | Żabno            |

Supplementary S2: PopID-DataTable

|     |       |           |        |                     |                         |                      |                      |
|-----|-------|-----------|--------|---------------------|-------------------------|----------------------|----------------------|
| 99  | 1039Z | 271715186 | 42-610 | Silesian            | tarnogórski             | Miasteczko Silesian  | Miasteczko Silesian  |
| 100 | 1039Z | 241398154 | 43-502 | Silesian            | bielski                 | Czechowice-Dziedzice | Czechowice-Dziedzice |
| 101 | 1039Z | 410219043 | 64-000 | Greater Poland      | kościański              | Kościan              | Kurza Góra           |
| 102 | 1039Z | 091367860 | 82-230 | Pomeranian          | malborski               | Nowy Staw            | Nowy Staw            |
| 103 | 1039Z | 590753395 | 98-354 | Lodz                | pajęczański             | Siemkowice           | Radoszewice          |
| 104 | 1039Z | 000474940 | 97-220 | Lodz                | tomaszowski             | Rzeczyca             | Bartoszkówka         |
| 105 | 1039Z | 590019270 | 97-350 | Lodz                | piotrkowski             | Gorzkowice           | Gorzkowice           |
| 106 | 1039Z | 152163365 | 42-202 | Silesian            | Częstochowa             | Częstochowa          | Częstochowa          |
| 107 | 1039Z | 100652739 | 98-355 | Lodz                | pajęczański             | Działoszyn           | Działoszyn           |
| 108 | 1039Z | 008166869 | 99-417 | Lodz                | skierniewicki           | Bolimów              | Bolimów              |
| 109 | 1039Z | 385858865 | 63-012 | Greater Poland      | średzki                 | Dominowo             | Dominowo             |
| 110 | 1039Z | 932986979 | 39-200 | Subcarpathian       | dębicki                 | Dębica               | Dębica               |
| 111 | 1039Z | 362193926 | 11-100 | Varmia-Mazuria      | lidzbarski              | Lidzbark Warmiński   | Jarandowo            |
| 112 | 1039Z | 010301283 | 53-674 | Lower Silesia       | Wrocław                 | Wrocław-Stare Miasto | Wrocław              |
| 113 | 1039Z | 472893475 | 93-331 | Lodz                | Łódź                    | Łódź-Górna           | Łódź                 |
| 114 | 1039Z | 690223613 | 37-123 | Subcarpathian       | łańcucki                | Łańcut               | Handzlówka           |
| 115 | 1039Z | 472346313 | 92-402 | Lodz                | Łódź                    | Łódź-Widzew          | Łódź                 |
| 116 | 1039Z | 100664524 | 99-400 | Lodz                | łowicki                 | Łowicz               | Łowicz               |
| 117 | 1039Z | 230109871 | 59-900 | Lower Silesia       | zgorzelecki             | Zgorzelec            | Zgorzelec            |
| 118 | 1039Z | 301408722 | 64-730 | Greater Poland      | czarnkowsko-trzcianecki | Wieleń               | Rosko                |
| 119 | 1039Z | 340818496 | 88-324 | Kuyavian-Pomeranian | mogileński              | Jeziora Wielkie      | Rzeszyn              |
| 120 | 1039Z | 150649431 | 42-110 | Silesian            | kłobucki                | Popów                | Popów                |
| 121 | 1039Z | 750809169 | 96-232 | Lodz                | rawski                  | Regnów               | Annośław             |
| 122 | 1039Z | 590024153 | 97-320 | Lodz                | piotrkowski             | Wolbórz              | Wolbórz              |
| 123 | 1039Z | 290854094 | 28-400 | Holy Cross          | pińczowski              | Pińczów              | Kopernia             |
| 124 | 1039Z | 871074395 | 86-300 | Kuyavian-Pomeranian | Grudziądz               | Grudziądz            | Grudziądz            |
| 125 | 1039Z | 092574330 | 88-190 | Kuyavian-Pomeranian | żniński                 | Barcin               | Barcin-Wieś          |
| 126 | 1039Z | 150928622 | 42-215 | Silesian            | Częstochowa             | Częstochowa          | Częstochowa          |
| 127 | 1039Z | 367152234 | 85-141 | Kuyavian-Pomeranian | Bydgoszcz               | Bydgoszcz            | Bydgoszcz            |
| 128 | 1039Z | 220854921 | 76-200 | Pomeranian          | słupski                 | Słupsk               | Głobino              |
| 129 | 1039Z | 150980924 | 42-110 | Silesian            | kłobucki                | Popów                | Dąbrowa              |
| 130 | 1039Z | 276176653 | 43-196 | Silesian            | mikołowski              | Mikołów              | Mikołów              |
| 131 | 1039Z | 150012567 | 42-260 | Silesian            | częstochowski           | Kamienica Polska     | Wanaty               |

## Supplementary S2: PopID-DataTable

|     |       |           |        |                     |                         |                  |                    |
|-----|-------|-----------|--------|---------------------|-------------------------|------------------|--------------------|
| 132 | 1039Z | 490017950 | 33-300 | Lesser Poland       | Nowy Sącz               | Nowy Sącz        | Nowy Sącz          |
| 133 | 1039Z | 240534690 | 42-284 | Silesian            | lubliniecki             | Herby            | Herby              |
| 134 | 1039Z | 357246173 | 32-250 | Lesser Poland       | miechowski              | Charsznica       | Miechów-Charsznica |
| 135 | 1039Z | 152165298 | 42-221 | Silesian            | Częstochowa             | Częstochowa      | Częstochowa        |
| 136 | 1039Z | 000888416 | 32-731 | Lesser Poland       | bocheński               | Żegocina         | Łąka Górna         |
| 137 | 1039Z | 850455610 | 33-100 | Lesser Poland       | Tarnów                  | Tarnów           | Tarnów             |
| 138 | 1039Z | 340053303 | 86-010 | Kuyavian-Pomeranian | bydgoski                | Koronowo         | Stopka             |
| 139 | 1039Z | 150358538 | 42-110 | Silesian            | kłobucki                | Popów            | Więcki             |
| 140 | 1039Z | 310215338 | 62-404 | Greater Poland      | słupecki                | Łądek            | Ciążeń             |
| 141 | 1039Z | 350567840 | 32-400 | Lesser Poland       | myślenicki              | Myślenice        | Myślenice          |
| 142 | 1039Z | 005878530 | 87-704 | Kuyavian-Pomeranian | aleksandrowski          | Bądkowo          | Łówkowice          |
| 143 | 1039Z | 160106496 | 32-090 | Lesser Poland       | krakowski               | Słomniki         | Niedźwiedź         |
| 144 | 1039Z | 242910430 | 40-847 | Silesian            | Katowice                | Katowice         | Katowice           |
| 145 | 1039Z | 020893809 | 52-351 | Lower Silesia       | wrocławski              | Kąty Wrocławskie | Zabrodzie          |
| 146 | 1039Z | 852520984 | 00-030 | Mazovian            | Warszawa                | Śródmieście      | Warszawa           |
| 147 | 1039Z | 301519083 | 64-730 | Greater Poland      | czarnkowsko-trzcianecki | Wieleń           | Rosko              |
| 148 | 1039Z | 271211310 | 43-200 | Silesian            | pszczyński              | Pszczyna         | Pszczyna           |
| 149 | 1039Z | 590844910 | 98-330 | Lodz                | pajęczański             | Pajęczno         | Pajęczno           |
| 150 | 1039Z | 340117859 | 87-214 | Kuyavian-Pomeranian | wąbrzeski               | Płużnica         | Płużnica           |
| 151 | 1039Z | 060161535 | 21-025 | Lublin              | lubelski                | Niemce           | Niemce             |
| 152 | 1039Z | 730005363 | 98-355 | Lodz                | pajęczański             | Działoszyn       | Działoszyn         |
| 153 | 1039Z | 730158138 | 98-354 | Lodz                | pajęczański             | Siemkowice       | Siemkowice         |
| 154 | 1039Z | 060069344 | 21-200 | Lublin              | parczewski              | Parczew          | Parczew            |
| 155 | 1039Z | 090498174 | 85-074 | Kuyavian-Pomeranian | Bydgoszcz               | Bydgoszcz        | Bydgoszcz          |
| 156 | 1039Z | 008031388 | 26-720 | Mazovian            | zwoleński               | Policzna         | Policzna           |
| 157 | 1039Z | 511447470 | 86-300 | Kuyavian-Pomeranian | Grudziądz               | Grudziądz        | Grudziądz          |
| 158 | 1039Z | 004701900 | 97-221 | Lodz                | tomaszowski             | Rokiciny         | Rokiciny-Kolonia   |
| 159 | 1039Z | 092982856 | 86-005 | Kuyavian-Pomeranian | bydgoski                | Białe Błota      | Białe Błota        |
| 160 | 1039Z | 276442043 | 44-340 | Silesian            | wodzisławski            | Godów            | Godów              |
| 161 | 1039Z | 852010295 | 32-823 | Lesser Poland       | brzeski                 | Brzesko          | Sterkowiec         |
| 162 | 1039Z | 340162937 | 86-300 | Kuyavian-Pomeranian | Grudziądz               | Grudziądz        | Grudziądz          |
| 163 | 1039Z | 390043582 | 59-220 | Lower Silesia       | Legnica                 | Legnica          | Legnica            |
| 164 | 1039Z | 651421921 | 37-206 | Subcarpathian       | przeworski              | Kańczuga         | Sietesz            |

Supplementary S2: PopID-DataTable

|     |       |           |        |                     |                |                      |                      |
|-----|-------|-----------|--------|---------------------|----------------|----------------------|----------------------|
| 165 | 1039Z | 141184350 | 00-446 | Mazovian            | Warszawa       | Śródmieście          | Warszawa             |
| 166 | 1039Z | 008247830 | 87-700 | Kuyavian-Pomeranian | aleksandrowski | Aleksandrów Kujawski | Aleksandrów Kujawski |
| 167 | 1039Z | 871210243 | 87-103 | Kuyavian-Pomeranian | toruński       | Wielka Nieszawka     | Mała Nieszawka       |
| 168 | 1039Z | 710023744 | 08-110 | Mazovian            | siedlecki      | Siedlce              | Żabokliki            |
| 169 | 1039Z | 010445912 | 07-410 | Mazovian            | ostrołęcki     | Rzekuń               | Ławy                 |
| 170 | 1039Z | 340023756 | 87-320 | Kuyavian-Pomeranian | brodnicki      | Górzno               | Miejszczewo          |
| 171 | 1039Z | 005150187 | 36-105 | Subcarpathian       | kolbuszowski   | Cmolas               | Cmolas               |
| 172 | 1039Z | 010094890 | 03-982 | Mazovian            | Warszawa       | Wawer                | Warszawa             |
| 173 | 1039Z | 016408562 | 04-790 | Mazovian            | Warszawa       | Wawer                | Warszawa             |
| 174 | 1039Z | 100606018 | 99-300 | Lodz                | kutnowski      | Kutno                | Kutno                |
| 175 | 1039Z | 290025989 | 26-021 | Holy Cross          | kielecki       | Daleszyce            | Daleszyce            |
| 176 | 1039Z | 830208152 | 27-580 | Holy Cross          | opatowski      | Sadowie              | Jacentów             |
| 177 | 1039Z | 003674710 | 26-052 | Holy Cross          | kielecki       | Nowiny               | Zgórsko              |
| 178 | 1039Z | 016029385 | 96-500 | Mazovian            | sochaczewski   | Sochaczew            | Kuznecin             |
| 179 | 1039Z | 386278940 | 92-515 | Lodz                | Łódź           | Łódź-Widzew          | Łódź                 |
| 180 | 1039Z | 301521045 | 64-020 | Greater Poland      | kościański     | Czempiń              | Jarogniewice         |
| 181 | 1039Z | 150587316 | 42-110 | Silesian            | kłobucki       | Popów                | Więcki               |
| 182 | 1039Z | 211264320 | 69-100 | Lubusz              | słubicki       | Słubice              | Słubice              |
| 183 | 1039Z | 210514015 | 69-110 | Lubusz              | słubicki       | Rzepin               | Rzepin               |
| 184 | 1039Z | 366355455 | 01-001 | Mazovian            | Warszawa       | Śródmieście          | Warszawa             |
| 185 | 1039Z | 291154281 | 26-010 | Holy Cross          | kielecki       | Bodzentyn            | Bodzentyn            |
| 186 | 1039Z | 388254790 | 43-600 | Silesian            | Jaworzno       | Jaworzno             | Jaworzno             |
| 187 | 1039Z | 382024094 | 97-500 | Lodz                | radomszczański | Radomsko             | Radomsko             |
| 188 | 1039Z | 670888587 | 27-200 | Holy Cross          | starachowicki  | Starachowice         | Starachowice         |
| 189 | 1039Z | 192772848 | 29-100 | Holy Cross          | włoszczowski   | Włoszczowa           | Danków Duży          |
| 190 | 1039Z | 730313366 | 98-354 | Lodz                | pajęczański    | Siemkowice           | Siemkowice           |
| 191 | 1039Z | 630714312 | 64-300 | Greater Poland      | nowotomyski    | Nowy Tomyśl          | Nowy Tomyśl          |
| 192 | 1039Z | 021520832 | 53-411 | Lower Silesia       | Wrocław        | Wrocław-Krzyki       | Wrocław              |
| 193 | 1039Z | 634480970 | 60-476 | Greater Poland      | Poznań         | Poznań-Jeżyce        | Poznań               |
| 194 | 1039Z | 310328947 | 62-510 | Greater Poland      | Konin          | Konin                | Konin                |
| 195 | 1039Z | 570855651 | 64-840 | Greater Poland      | chodzieski     | Budzyń               | Dziewoklucz          |
| 196 | 1039Z | 950442797 | 22-600 | Lublin              | tomaszowski    | Tomaszów Lubelski    | Tomaszów Lubelski    |
| 197 | 1039Z | 300957020 | 62-817 | Greater Poland      | kaliski        | Żelazków             | Dębe                 |

## Supplementary S2: PopID-DataTable

|     |       |           |        |                     |                        |                     |                     |
|-----|-------|-----------|--------|---------------------|------------------------|---------------------|---------------------|
| 198 | 1039Z | 670085339 | 26-640 | Mazovian            | radomski               | Skaryszew           | Maków               |
| 199 | 1039Z | 911255255 | 88-200 | Kuyavian-Pomeranian | radziejowski           | Radziejów           | Radziejów           |
| 200 | 1039Z | 384407712 | 05-870 | Mazovian            | warszawski zachodni    | Błonie              | Błonie              |
| 201 | 1039Z | 382323247 | 05-520 | Mazovian            | piaseczyński           | Konstancin-Jeziorna | Łęg                 |
| 202 | 1039Z | 277872350 | 41-500 | Silesian            | Chorzów                | Chorzów             | Chorzów             |
| 203 | 1039Z | 870554549 | 87-162 | Kuyavian-Pomeranian | toruński               | Lubicz              | Lubicz Dolny        |
| 204 | 1039Z | 388190209 | 05-126 | Mazovian            | legionowski            | Nieporęt            | Michałów-Grabina    |
| 205 | 1039Z | 380485313 | 85-141 | Kuyavian-Pomeranian | Bydgoszcz              | Bydgoszcz           | Bydgoszcz           |
| 206 | 1039Z | 380512725 | 85-141 | Kuyavian-Pomeranian | Bydgoszcz              | Bydgoszcz           | Bydgoszcz           |
| 207 | 1039Z | 241120810 | 43-200 | Silesian            | pszczyński             | Pszczyna            | Pszczyna            |
| 208 | 1039Z | 012272090 | 00-446 | Mazovian            | Warszawa               | Śródmieście         | Warszawa            |
| 209 | 1039Z | 387726837 | 32-020 | Lesser Poland       | wielicki               | Biskupice           | Trąbki              |
| 210 | 1039Z | 430033989 | 87-100 | Kuyavian-Pomeranian | Toruń                  | Toruń               | Toruń               |
| 211 | 1039Z | 151503385 | 42-202 | Silesian            | Częstochowa            | Częstochowa         | Częstochowa         |
| 212 | 1039Z | 388297114 | 62-081 | Greater Poland      | poznański              | Tarnowo Podgórne    | Wysogotowo          |
| 213 | 1039Z | 231106596 | 58-508 | Lower Silesia       | karkonoski             | Mysłakowice         | Łomnica             |
| 214 | 1039Z | 364477830 | 62-817 | Greater Poland      | kaliski                | Żelazków            | Witoldów            |
| 215 | 1039Z | 321187300 | 02-797 | Mazovian            | Warszawa               | Wilanów             | Warszawa            |
| 216 | 1039Z | 150043651 | 42-110 | Silesian            | kłobucki               | Popów               | Wąsosz Górny        |
| 217 | 1039Z | 150504678 | 42-110 | Silesian            | kłobucki               | Popów               | Wąsosz Dolny        |
| 218 | 1039Z | 365372109 | 04-320 | Mazovian            | Warszawa               | Praga-Południe      | Warszawa            |
| 219 | 1039Z | 388115604 | 34-370 | Silesian            | żywiecki               | Rajcza              | Sól-Kiczora         |
| 220 | 1039Z | 386836877 | 82-200 | Pomeranian          | malborski              | Malbork             | Malbork             |
| 221 | 1039Z | 210151096 | 66-520 | Lubusz              | strzelecko-drezdenecki | Dobiegniew          | Radęcin             |
| 222 | 1039Z | 220754036 | 83-213 | Pomeranian          | starogardzki           | Skórcz              | Wolental            |
| 223 | 1039Z | 340387866 | 86-300 | Kuyavian-Pomeranian | Grudziądz              | Grudziądz           | Grudziądz           |
| 224 | 0113Z | 364770196 | 88-133 | Kuyavian-Pomeranian | inowrocławski          | Dąbrowa Biskupia    | Zagajewice          |
| 225 | 1039Z | 273798331 | 40-847 | Silesian            | Katowice               | Katowice            | Katowice            |
| 226 | 1039Z | 080153632 | 40-847 | Silesian            | Katowice               | Katowice            | Katowice            |
| 227 | 1039Z | 147370680 | 02-646 | Mazovian            | Warszawa               | Mokotów             | Warszawa            |
| 228 | 1039Z | 015153723 | 02-646 | Mazovian            | Warszawa               | Warszawa            | Warszawa            |
| 229 | 1039Z | 383587155 | 66-400 | Lubusz              | Gorzów Wielkopolski    | Gorzów Wielkopolski | Gorzów Wielkopolski |
| 230 | 1039Z | 100351765 | 98-320 | Lodz                | wieluński              | Osjaków             | Krzętle             |



Supplementary S2: PopID-DataTable

|     |       |           |        |                     |                     |                     |                     |
|-----|-------|-----------|--------|---------------------|---------------------|---------------------|---------------------|
| 231 | 1039Z | 000466359 | 62-067 | Greater Poland      | grodziski           | Rakoniewice         | Goździn             |
| 232 | 1039Z | 387922165 | 32-250 | Lesser Poland       | miechowski          | Charsznica          | Jelcza              |
| 233 | 1039Z | 610213940 | 96-520 | Mazovian            | sochaczewski        | Itów                | Narty               |
| 234 | 1039Z | 121117369 | 32-250 | Lesser Poland       | miechowski          | Charsznica          | Chodów              |
| 235 | 1039Z | 387537094 | 58-124 | Lower Silesia       | świdnicki           | Marcinowice         | Mysłaków            |
| 236 | 1039Z | 387604040 | 58-124 | Lower Silesia       | świdnicki           | Marcinowice         | Mysłaków            |
| 237 | 1039Z | 180483020 | 37-300 | Subcarpathian       | leżajski            | Leżajsk             | Leżajsk             |
| 238 | 1039Z | 386087453 | 53-428 | Lower Silesia       | Wrocław             | Wrocław-Fabryczna   | Wrocław             |
| 239 | 1039Z | 016042026 | 05-870 | Mazovian            | warszawski zachodni | Błonie              | Bramki              |
| 240 | 1039Z | 432254944 | 24-150 | Lublin              | puławski            | Nałęczów            | Piotrowice          |
| 241 | 1039Z | 384939544 | 60-366 | Greater Poland      | Poznań              | Poznań-Grunwald     | Poznań              |
| 242 | 1039Z | 100113385 | 98-220 | Lodz                | zduńskowolski       | Zduńska Wola        | Zduńska Wola        |
| 243 | 1039Z | 060404676 | 20-234 | Lublin              | Lublin              | Lublin              | Lublin              |
| 244 | 1039Z | 302619119 | 64-232 | Greater Poland      | wolsztyński         | Siedlec             | Stara Tuchorza      |
| 245 | 1039Z | 240808934 | 34-360 | Silesian            | żywiecki            | Milówka             | Milówka             |
| 246 | 1039Z | 100865524 | 92-701 | Lodz                | łódzki wschodni     | Nowosolna           | Wódka               |
| 247 | 1039Z | 300891716 | 63-840 | Greater Poland      | gostyński           | Krobia              | Pudliszki           |
| 248 | 1039Z | 260001558 | 63-840 | Greater Poland      | gostyński           | Krobia              | Pudliszki           |
| 249 | 1039Z | 301752709 | 64-030 | Greater Poland      | kościański          | Śmigiel             | Stare Bojanowo      |
| 250 | 1039Z | 015470553 | 02-554 | Mazovian            | Warszawa            | Mokotów             | Warszawa            |
| 251 | 1039Z | 330524207 | 05-510 | Mazovian            | piaseczyński        | Konstancin-Jeziorna | Konstancin-Jeziorna |
| 252 | 1039Z | 321354761 | 05-510 | Mazovian            | piaseczyński        | Konstancin-Jeziorna | Konstancin-Jeziorna |
| 253 | 1039Z | 221546989 | 84-240 | Pomeranian          | wejherowski         | Reda                | Reda                |
| 254 | 1039Z | 080003312 | 69-200 | Lubusz              | sulęciński          | Sulęcín             | Sulęcín             |
| 255 | 1039Z | 080123750 | 66-433 | Lubusz              | gorzowski           | Lubiszyn            | Lubiszyn            |
| 256 | 1039Z | 292882002 | 27-532 | Holy Cross          | opatowski           | Wojciechowice       | Drygulec            |
| 257 | 1039Z | 631273703 | 62-025 | Greater Poland      | poznański           | Kostrzyn            | Siekierki Wielkie   |
| 258 | 1039Z | 091582190 | 13-334 | Varmia-Mazuria      | nowomiejski         | Biskupiec           | Mierzyn             |
| 259 | 1039Z | 510025241 | 12-160 | Varmia-Mazuria      | szczycieński        | Wielbark            | Wielbark            |
| 260 | 1039Z | 141119128 | 64-010 | Greater Poland      | kościański          | Krzywiń             | Krzywiń             |
| 261 | 1039Z | 387153927 | 20-111 | Lublin              | Lublin              | Lublin              | Lublin              |
| 262 | 1039Z | 891082752 | 53-224 | Lower Silesia       | Wrocław             | Wrocław-Fabryczna   | Wrocław             |
| 263 | 1039Z | 384891850 | 87-100 | Kuyavian-Pomeranian | Toruń               | Toruń               | Toruń               |

Supplementary S2: PopID-DataTable

|     |       |           |        |                 |               |                     |                    |
|-----|-------|-----------|--------|-----------------|---------------|---------------------|--------------------|
| 264 | 1039Z | 011263679 | 05-500 | Mazovian        | piaseczyński  | Lesznowola          | Mysiadło           |
| 265 | 1039Z | 011599037 | 05-088 | Mazovian        | sochaczewski  | Brochów             | Brochów            |
| 266 | 1039Z | 357206015 | 32-250 | Lesser Poland   | miechowski    | Charsznica          | Jelcza             |
| 267 | 1039Z | 015450674 | 02-467 | Mazovian        | Warszawa      | Włochy              | Warszawa           |
| 268 | 1039Z | 639815121 | 61-765 | Greater Poland  | Poznań        | Poznań-Stare Miasto | Poznań             |
| 269 | 1039Z | 250386365 | 62-850 | Greater Poland  | kaliski       | Lisków              | Żychów             |
| 270 | 1039Z | 015259686 | 17-307 | Podlasie        | siemiatycki   | Mielnik             | Mielnik            |
| 271 | 1039Z | 300113700 | 62-023 | Greater Poland  | poznański     | Kórnik              | Gądk               |
| 272 | 1039Z | 432698670 | 24-220 | Lublin          | lubelski      | Niedzwica Duża      | Niedzwica Duża     |
| 273 | 1039Z | 634365512 | 62-035 | Greater Poland  | poznański     | Kórnik              | Kórnik             |
| 274 | 1039Z | 387430255 | 43-300 | Silesian        | Bielsko-Biała | Bielsko-Biała       | Bielsko-Biała      |
| 275 | 1039Z | 634383852 | 64-100 | Greater Poland  | Leszno        | Leszno              | Leszno             |
| 276 | 1039Z | 300191479 | 64-234 | Greater Poland  | wolsztyński   | Przemęt             | Przemęt            |
| 277 | 1039Z | 012594361 | 09-142 | Mazovian        | płoński       | Załużski            | Przyborowice Dolne |
| 278 | 1039Z | 300086009 | 60-179 | Greater Poland  | Poznań        | Poznań-Grunwald     | Poznań             |
| 279 | 1039Z | 243488074 | 42-215 | Silesian        | Częstochowa   | Częstochowa         | Częstochowa        |
| 280 | 1039Z | 190114822 | 83-400 | Pomeranian      | kościerski    | Kościerzyna         | Kościerzyna        |
| 281 | 1039Z | 180661880 | 37-300 | Subcarpathian   | leżajski      | Leżajsk             | Leżajsk            |
| 282 | 1039Z | 690701449 | 37-300 | Subcarpathian   | leżajski      | Leżajsk             | Leżajsk            |
| 283 | 1039Z | 730112998 | 98-355 | Lodz            | pajęczański   | Działoszyn          | Działoszyn         |
| 284 | 1039Z | 300039926 | 64-200 | Greater Poland  | wolsztyński   | Wolsztyn            | Berzyna            |
| 285 | 1039Z | 812739449 | 72-010 | West-Pomeranian | policki       | Police              | Police             |
| 286 | 1039Z | 639750746 | 63-000 | Greater Poland  | średzki       | Środa Wielkopolska  | Kijewo             |
| 287 | 1039Z | 150652195 | 42-110 | Silesian        | kłobucki      | Popów               | Wąsosz Dolny       |
| 288 | 1039Z | 030106169 | 21-200 | Lublin          | parczewski    | Parczew             | Parczew            |
| 289 | 1039Z | 302584303 | 61-612 | Greater Poland  | Poznań        | Poznań-Stare Miasto | Poznań             |
| 290 | 1039Z | 432657910 | 24-300 | Lublin          | opolski       | Opole Lublin        | Opole Lublin       |
| 291 | 1039Z | 147333822 | 78-640 | West-Pomeranian | wałęcki       | Tuczno              | Tuczno             |
| 292 | 1039Z | 410289078 | 64-000 | Greater Poland  | kościński     | Kościan             | Kościan            |
| 293 | 1039Z | 000476872 | 64-050 | Greater Poland  | grodziski     | Wielichowo          | Łubnica            |
| 294 | 1039Z | 302367534 | 63-410 | Greater Poland  | ostrowski     | Ostrów Wielkopolski | Karski             |
| 295 | 1039Z | 381818567 | 89-632 | Pomeranian      | chojnicki     | Brusy               | Brusy              |
| 296 | 1039Z | 241670509 | 43-190 | Silesian        | mikołowski    | Mikołów             | Mikołów            |



Supplementary S2: PopID-DataTable

|     |       |           |        |                     |                |                   |                  |
|-----|-------|-----------|--------|---------------------|----------------|-------------------|------------------|
| 297 | 1039Z | 072924283 | 43-384 | Silesian            | bielski        | Jaworze           | Jaworze          |
| 298 | 1039Z | 122404326 | 37-400 | Subcarpathian       | nizański       | Nisko             | Nisko            |
| 299 | 1039Z | 050424356 | 16-070 | Podlasie            | białostocki    | Choroszcz         | Choroszcz        |
| 300 | 1039Z | 060762542 | 24-123 | Lublin              | puławski       | Janowiec          | Janowiec         |
| 301 | 1039Z | 387143900 | 03-982 | Mazovian            | Warszawa       | Praga-Południe    | Warszawa         |
| 302 | 1039Z | 000871870 | 68-132 | Lubusz              | żarski         | Przewóz           | Przewóz          |
| 303 | 1039Z | 811867211 | 03-982 | Mazovian            | Warszawa       | Praga-Południe    | Warszawa         |
| 304 | 1039Z | 951144961 | 30-705 | Lesser Poland       | Kraków         | Kraków-Podgórze   | Kraków           |
| 305 | 1039Z | 362052054 | 23-310 | Lublin              | janowski       | Modliborzyce      | Ciechocin        |
| 306 | 1039Z | 970184983 | 65-124 | Lubusz              | Zielona Góra   | Zielona Góra      | Zielona Góra     |
| 307 | 1039Z | 008019565 | 64-100 | Greater Poland      | Leszno         | Leszno            | Leszno           |
| 308 | 1039Z | 290434618 | 27-200 | Holy Cross          | starachowicki  | Starachowice      | Starachowice     |
| 309 | 1039Z | 852642813 | 33-100 | Lesser Poland       | Tarnów         | Tarnów            | Tarnów           |
| 310 | 1039Z | 302701192 | 64-100 | Greater Poland      | Leszno         | Leszno            | Leszno           |
| 311 | 1039Z | 871188199 | 86-300 | Kuyavian-Pomeranian | Grudziądz      | Grudziądz         | Grudziądz        |
| 312 | 1039Z | 366641675 | 24-313 | Lublin              | opolski        | Wilków            | Wólka Polanowska |
| 313 | 1039Z | 092383162 | 87-148 | Kuyavian-Pomeranian | toruński       | Łysomice          | Łysomice         |
| 314 | 1039Z | 340366700 | 89-121 | Kuyavian-Pomeranian | nakielski      | Nakło nad Notecią | Ślesin           |
| 315 | 1039Z | 250757910 | 62-820 | Greater Poland      | kaliski        | Stawiszyn         | Piątek Mały      |
| 316 | 1039Z | 430038596 | 24-150 | Lublin              | puławski       | Nałęczów          | Nałęczów         |
| 317 | 1039Z | 977895948 | 66-003 | Lubusz              | zielonogórski  | Zabór             | Łaz              |
| 318 | 1039Z | 146196599 | 02-765 | Mazovian            | Warszawa       | Mokotów           | Warszawa         |
| 319 | 1039Z | 141300514 | 02-765 | Mazovian            | Warszawa       | Mokotów           | Warszawa         |
| 320 | 1039Z | 850383655 | 32-823 | Lesser Poland       | brzeski        | Brzesko           | Sterkowiec       |
| 321 | 1039Z | 852742905 | 32-823 | Lesser Poland       | brzeski        | Brzesko           | Sterkowiec       |
| 322 | 1039Z | 369828010 | 41-260 | Silesian            | będziński      | Sławków           | Sławków          |
| 323 | 1039Z | 490661609 | 34-600 | Lesser Poland       | limanowski     | Limanowa          | Limanowa         |
| 324 | 1039Z | 030807179 | 21-500 | Lublin              | Biała Podlaska | Biała Podlaska    | Biała Podlaska   |
| 325 | 1039Z | 385812432 | 03-287 | Mazovian            | Warszawa       | Białołęka         | Warszawa         |
| 326 | 1039Z | 364233370 | 00-710 | Mazovian            | Warszawa       | Mokotów           | Warszawa         |
| 327 | 1039Z | 273747836 | 42-660 | Silesian            | tarnogórski    | Kalety            | Kalety           |
| 328 | 1039Z | 363412460 | 26-432 | Mazovian            | przysuski      | Wieniawa          | Pogroszyn        |
| 329 | 1039Z | 276068716 | 44-362 | Silesian            | wodzisławski   | Gorzyce           | Bełżnica         |

## Supplementary S2: PopID-DataTable

|     |       |           |        |                |                       |                       |                       |
|-----|-------|-----------|--------|----------------|-----------------------|-----------------------|-----------------------|
| 330 | 1039Z | 146665456 | 02-703 | Mazovian       | Warszawa              | Mokotów               | Warszawa              |
| 331 | 1039Z | 241281601 | 42-216 | Silesian       | Częstochowa           | Częstochowa           | Częstochowa           |
| 332 | 1039Z | 383344955 | 04-784 | Mazovian       | Warszawa              | Wawer                 | Warszawa              |
| 333 | 1039Z | 430305382 | 20-124 | Lublin         | Lublin                | Lublin                | Lublin                |
| 334 | 1039Z | 120946974 | 30-798 | Lesser Poland  | Kraków                | Kraków-Podgórze       | Kraków                |
| 335 | 1039Z | 003141416 | 66-431 | Lubusz         | gorzowski             | Santok                | Stare Polichno        |
| 336 | 1039Z | 211247579 | 66-431 | Lubusz         | gorzowski             | Santok                | Stare Polichno        |
| 337 | 1039Z | 730915036 | 98-200 | Lodz           | sieradzki             | Sieradz               | Sieradz               |
| 338 | 1039Z | 369349343 | 05-092 | Mazovian       | warszawski zachodni   | Łomianki              | Łomianki              |
| 339 | 1039Z | 011085746 | 04-708 | Mazovian       | Warszawa              | Wawer                 | Warszawa              |
| 340 | 1039Z | 180488016 | 31-159 | Lesser Poland  | Kraków                | Kraków-Śródmieście    | Kraków                |
| 341 | 1039Z | 970380543 | 66-132 | Lubusz         | zielonogórski         | Trzebiechów           | Trzebiechów           |
| 342 | 1039Z | 001323142 | 01-480 | Mazovian       | Warszawa              | Bemowo                | Warszawa              |
| 343 | 1039Z | 003547785 | 32-300 | Lesser Poland  | olkuski               | Olkusz                | Olkusz                |
| 344 | 1039Z | 243604623 | 43-300 | Silesian       | Bielsko-Biała         | Bielsko-Biała         | Bielsko-Biała         |
| 345 | 1039Z | 016941888 | 05-170 | Mazovian       | nowodworski           | Zakroczym             | Trębki Nowe           |
| 346 | 1039Z | 730185141 | 98-355 | Lodz           | pajęczański           | Działoszyn            | Działoszyn            |
| 347 | 1039Z | 005996300 | 51-114 | Lower Silesia  | Wrocław               | Wrocław-Psie Pole     | Wrocław               |
| 348 | 1039Z | 004161705 | 20-502 | Lublin         | Lublin                | Lublin                | Lublin                |
| 349 | 1039Z | 100290822 | 95-200 | Lodz           | pabianicki            | Pabianice             | Pabianice             |
| 350 | 1039Z | 001052631 | 96-124 | Lodz           | skierniewicki         | Maków                 | Maków                 |
| 351 | 1039Z | 006227740 | 05-504 | Mazovian       | piaseczyński          | Piasечно              | Runów                 |
| 352 | 1039Z | 851664072 | 32-700 | Lesser Poland  | bocheński             | Bochnia               | Bochnia               |
| 353 | 1039Z | 151405560 | 42-110 | Silesian       | kłobucki              | Popów                 | Zbory                 |
| 354 | 1039Z | 272643098 | 41-800 | Silesian       | Zabrze                | Zabrze                | Zabrze                |
| 355 | 1039Z | 362343159 | 41-106 | Silesian       | Siemianowice Silesian | Siemianowice Silesian | Siemianowice Silesian |
| 356 | 1039Z | 123135756 | 32-310 | Lesser Poland  | olkuski               | Klucze                | Bydlin                |
| 357 | 1039Z | 130345273 | 06-500 | Mazovian       | mławski               | Mława                 | Mława                 |
| 358 | 1039Z | 610051666 | 96-520 | Mazovian       | sochaczewski          | Łódź                  | Łódź                  |
| 359 | 1039Z | 362387955 | 33-380 | Lesser Poland  | nowosądecki           | Krynica-Zdrój         | Krynica-Zdrój         |
| 360 | 1039Z | 363844076 | 62-817 | Greater Poland | kaliski               | Żelazków              | Garzew                |
| 361 | 1039Z | 000627118 | 26-922 | Mazovian       | kozienicki            | Sieciechów            | Sieciechów            |
| 362 | 1039Z | 141391310 | 05-170 | Mazovian       | nowodworski           | Zakroczym             | Zakroczym             |

Supplementary S2: PopID-DataTable

|     |       |           |        |                     |                     |              |                 |
|-----|-------|-----------|--------|---------------------|---------------------|--------------|-----------------|
| 363 | 1039Z | 368055326 | 12-100 | Varmia-Mazuria      | szczycieński        | Szczytno     | Romany          |
| 364 | 1039Z | 551181288 | 07-420 | Mazovian            | ostrołęcki          | Kadzidło     | Dylewo          |
| 365 | 1039Z | 146867473 | 05-092 | Mazovian            | warszawski zachodni | Łomianki     | Łomianki        |
| 366 | 1039Z | 017357938 | 05-092 | Mazovian            | warszawski zachodni | Łomianki     | Łomianki        |
| 367 | 1039Z | 241652428 | 34-120 | Lesser Poland       | wadowicki           | Andrychów    | Andrychów       |
| 368 | 1039Z | 222132830 | 76-200 | Pomeranian          | Słupsk              | Słupsk       | Słupsk          |
| 369 | 1039Z | 211019335 | 05-250 | Mazovian            | wołomiński          | Radzymin     | Radzymin        |
| 370 | 1039Z | 210017305 | 66-433 | Lubusz              | gorzowski           | Lubiszyn     | Wysoka          |
| 371 | 1039Z | 010920879 | 00-180 | Mazovian            | Warszawa            | Śródmieście  | Warszawa        |
| 372 | 1039Z | 010843311 | 05-800 | Mazovian            | pruszkowski         | Pruszków     | Pruszków        |
| 373 | 1039Z | 060106358 | 24-300 | Lublin              | opolski             | Opole Lublin | Skoków          |
| 374 | 1039Z | 015533555 | 05-083 | Mazovian            | warszawski zachodni | Leszno       | Wyględy         |
| 375 | 1039Z | 146207305 | 02-765 | Mazovian            | Warszawa            | Mokotów      | Warszawa        |
| 376 | 1039Z | 011368792 | 01-934 | Mazovian            | Warszawa            | Bielany      | Warszawa        |
| 377 | 1039Z | 010628512 | 01-922 | Mazovian            | Warszawa            | Bielany      | Warszawa        |
| 378 | 1039Z | 200394062 | 15-879 | Podlasie            | Białystok           | Białystok    | Białystok       |
| 379 | 1039Z | 002303360 | 00-384 | Mazovian            | Warszawa            | Śródmieście  | Warszawa        |
| 380 | 1039Z | 010994866 | 03-710 | Mazovian            | Warszawa            | Praga-Północ | Warszawa        |
| 381 | 1039Z | 015651846 | 00-345 | Mazovian            | Warszawa            | Śródmieście  | Warszawa        |
| 382 | 1039Z | 251610965 | 62-817 | Greater Poland      | kaliski             | Żelazków     | Kolonia Kokanin |
| 383 | 1039Z | 240791808 | 42-164 | Silesian            | kłobucki            | Lipie        | Kleśniska       |
| 384 | 1039Z | 013251108 | 01-494 | Mazovian            | Warszawa            | Bemowo       | Warszawa        |
| 385 | 1039Z | 340098524 | 87-850 | Kuyavian-Pomeranian | włocławski          | Chocień      | Śmiłowice       |
| 386 | 1039Z | 362453735 | 24-224 | Lublin              | lubelski            | Borzechów    | Białawoda       |
| 387 | 1039Z | 010275137 | 03-683 | Mazovian            | Warszawa            | Targówek     | Warszawa        |
| 388 | 1039Z | 146559323 | 00-695 | Mazovian            | Warszawa            | Śródmieście  | Warszawa        |
| 389 | 1039Z | 140574267 | 26-910 | Mazovian            | kozienicki          | Magnuszew    | Latków          |
| 390 | 1039Z | 978079910 | 00-112 | Mazovian            | Warszawa            | Śródmieście  | Warszawa        |
| 391 | 1039Z | 010892315 | 02-495 | Mazovian            | Warszawa            | Ursus        | Warszawa        |
| 392 | 1039Z | 368322655 | 19-200 | Podlasie            | grajewski           | Grajewo      | Grajewo         |
| 393 | 1039Z | 011737427 | 05-551 | Mazovian            | piaseczyński        | Lesznówola   | Stefanowo       |
| 394 | 1039Z | 146658048 | 05-620 | Mazovian            | grójecki            | Błędów       | Trzylatków Duży |
| 395 | 1039Z | 015487418 | 02-201 | Mazovian            | Warszawa            | Ochota       | Warszawa        |

## Supplementary S2: PopID-DataTable

|     |       |           |        |               |               |                     |              |
|-----|-------|-----------|--------|---------------|---------------|---------------------|--------------|
| 396 | 1039Z | 010081290 | 05-806 | Mazovian      | pruszkowski   | Michałowice         | Granica      |
| 397 | 1039Z | 160150669 | 45-068 | Opole         | Opole         | Opole               | Opole        |
| 398 | 1039Z | 015526354 | 05-326 | Mazovian      | wołomiński    | Poświętne           | Nowe Ręczaje |
| 399 | 1039Z | 750082780 | 96-515 | Mazovian      | sochaczewski  | Teresin             | Teresin      |
| 400 | 1039Z | 140789878 | 05-622 | Mazovian      | grójecki      | Belsk Duży          | Łęczeszyce   |
| 401 | 1039Z | 242967660 | 40-013 | Silesian      | Katowice      | Katowice            | Katowice     |
| 402 | 1039Z | 852707837 | 33-190 | Lesser Poland | tarnowski     | Ciężkowice          | Kąсна Dolna  |
| 403 | 1039Z | 368326185 | 34-532 | Lesser Poland | tatrzański    | Bukowina Tatrzańska | Jurgów       |
| 404 | 1039Z | 690211047 | 37-100 | Subcarpathian | łańcucki      | Łańcut              | Łańcut       |
| 405 | 1039Z | 365641101 | 35-051 | Subcarpathian | Rzeszów       | Rzeszów             | Rzeszów      |
| 406 | 1039Z | 770719746 | 77-141 | Pomeranian    | bytowski      | Borzytuchom         | Borzytuchom  |
| 407 | 1039Z | 221862584 | 81-533 | Pomeranian    | Gdynia        | Gdynia              | Gdynia       |
| 408 | 1039Z | 150364562 | 42-700 | Silesian      | lubliniecki   | Pawonków            | Solarnia     |
| 409 | 1039Z | 200064360 | 15-399 | Podlasie      | Białystok     | Białystok           | Białystok    |
| 410 | 1039Z | 273019730 | 47-400 | Silesian      | raciborski    | Racibórz            | Racibórz     |
| 411 | 1039Z | 072311630 | 43-332 | Silesian      | bielski       | Wilamowice          | Pisarzowice  |
| 412 | 1039Z | 012868551 | 04-859 | Mazovian      | Warszawa      | Wawer               | Warszawa     |
| 413 | 1039Z | 190280294 | 83-010 | Pomeranian    | gdański       | Pruszcz Gdański     | Straszyn     |
| 414 | 1039Z | 011193861 | 04-794 | Mazovian      | Warszawa      | Wawer               | Warszawa     |
| 415 | 1039Z | 011971650 | 03-986 | Mazovian      | Warszawa      | Wawer               | Warszawa     |
| 416 | 1039Z | 011213144 | 04-788 | Mazovian      | Warszawa      | Wawer               | Warszawa     |
| 417 | 1039Z | 010393339 | 01-047 | Mazovian      | Warszawa      | Wola                | Warszawa     |
| 418 | 1039Z | 910862585 | 43-370 | Silesian      | bielski       | Szczyrk             | Szczyrk      |
| 419 | 1039Z | 150034273 | 42-240 | Silesian      | częstochowski | Rędziny             | Rudniki      |
| 420 | 1039Z | 241112850 | 42-110 | Silesian      | kłobucki      | Popów               | Zbory        |
| 421 | 1039Z | 650007349 | 37-200 | Subcarpathian | przeworski    | Przeworsk           | Przeworsk    |
| 422 | 1039Z | 001394142 | 42-284 | Silesian      | lubliniecki   | Herby               | Herby        |
| 423 | 1039Z | 241594381 | 42-284 | Silesian      | lubliniecki   | Herby               | Herby        |
| 424 | 1039Z | 150636144 | 40-833 | Silesian      | Katowice      | Katowice            | Katowice     |
| 425 | 1039Z | 271242641 | 42-672 | Silesian      | tarnogórski   | Zbrosławice         | Wieszowa     |
| 426 | 1039Z | 190271622 | 83-330 | Pomeranian    | kartuski      | Żukowo              | Żukowo       |
| 427 | 1039Z | 271975852 | 44-100 | Silesian      | Gliwice       | Gliwice             | Gliwice      |
| 428 | 1039Z | 190428176 | 83-130 | Pomeranian    | tczewski      | Pelplin             | Pelplin      |

Supplementary S2: PopID-DataTable

|     |       |           |        |                     |                         |                     |                     |
|-----|-------|-----------|--------|---------------------|-------------------------|---------------------|---------------------|
| 429 | 1039Z | 192761081 | 80-736 | Pomeranian          | Gdańsk                  | Gdańsk              | Gdańsk              |
| 430 | 1039Z | 650073820 | 37-220 | Subcarpathian       | przeworski              | Kańczuga            | Kańczuga            |
| 431 | 1039Z | 272724431 | 44-348 | Silesian            | wodzisławski            | Godów               | Skrzyszów           |
| 432 | 1039Z | 222132860 | 76-200 | Pomeranian          | Słupsk                  | Słupsk              | Słupsk              |
| 433 | 1039Z | 411287762 | 62-067 | Greater Poland      | grodziski               | Rakoniewice         | Rakoniewice         |
| 434 | 1039Z | 384552555 | 43-250 | Silesian            | pszczyński              | Pawłowice           | Pawłowice           |
| 435 | 1039Z | 170736628 | 82-540 | Varmia-Mazuria      | iławski                 | Susz                | Susz                |
| 436 | 1039Z | 366541608 | 64-212 | Greater Poland      | wolsztyński             | Siedlec             | Siedlec             |
| 437 | 1039Z | 250462008 | 62-800 | Greater Poland      | Kalisz                  | Kalisz              | Kalisz              |
| 438 | 1039Z | 411444871 | 64-100 | Greater Poland      | Leszno                  | Leszno              | Leszno              |
| 439 | 1039Z | 301801649 | 64-100 | Greater Poland      | Leszno                  | Leszno              | Leszno              |
| 440 | 1039Z | 634514171 | 62-052 | Greater Poland      | poznański               | Komorniki           | Komorniki           |
| 441 | 1039Z | 630730191 | 62-025 | Greater Poland      | poznański               | Kostrzyn            | Kostrzyn            |
| 442 | 1039Z | 631001502 | 62-300 | Greater Poland      | wrzesiński              | Września            | Września            |
| 443 | 1039Z | 630132283 | 64-330 | Greater Poland      | nowotomyski             | Opalenica           | Opalenica           |
| 444 | 1039Z | 300033473 | 64-915 | Greater Poland      | złotowski               | Jastrowie           | Jastrowie           |
| 445 | 1039Z | 631178169 | 60-003 | Greater Poland      | Poznań                  | Poznań-Grunwald     | Poznań              |
| 446 | 1039Z | 250496579 | 63-400 | Greater Poland      | ostrowski               | Ostrów Wielkopolski | Ostrów Wielkopolski |
| 447 | 1039Z | 631264615 | 64-310 | Greater Poland      | nowotomyski             | Lwówek              | Lwówek              |
| 448 | 1039Z | 302649066 | 64-731 | Greater Poland      | czarnkowsko-trzcianecki | Drawsko             | Drawski Młyn        |
| 449 | 1039Z | 932789486 | 64-400 | Greater Poland      | międzychodzki           | Międzychód          | Międzychód          |
| 450 | 1039Z | 630118337 | 61-211 | Greater Poland      | Poznań                  | Poznań-Nowe Miasto  | Poznań              |
| 451 | 1039Z | 220887576 | 76-200 | Pomeranian          | słupski                 | Słupsk              | Głobino             |
| 452 | 1039Z | 639527511 | 60-193 | Greater Poland      | Poznań                  | Poznań-Grunwald     | Poznań              |
| 453 | 1039Z | 008495478 | 60-349 | Greater Poland      | Poznań                  | Poznań-Grunwald     | Poznań              |
| 454 | 1039Z | 368252618 | 84-140 | Pomeranian          | pucki                   | Jastarnia           | Jastarnia           |
| 455 | 1039Z | 330035260 | 75-216 | West-Pomeranian     | Koszalin                | Koszalin            | Koszalin            |
| 456 | 1039Z | 292400693 | 25-045 | Holy Cross          | Kielce                  | Kielce              | Kielce              |
| 457 | 1039Z | 000465354 | 64-020 | Greater Poland      | kościański              | Czempiń             | Czempiń             |
| 458 | 1039Z | 430790680 | 23-240 | Lublin              | opolski                 | Józefów nad Wisłą   | Józefów nad Wisłą   |
| 459 | 1039Z | 150229930 | 42-265 | Silesian            | częstochoowski          | Dąbrowa Zielona     | Dąbrowa Zielona     |
| 460 | 1039Z | 791003106 | 02-793 | Mazovian            | Warszawa                | Ursynów             | Warszawa            |
| 461 | 1039Z | 090519137 | 88-170 | Kuyavian-Pomeranian | inowrocławski           | Pakość              | Pakość              |

Supplementary S2: PopID-DataTable

|     |       |           |        |                     |                     |                       |                   |
|-----|-------|-----------|--------|---------------------|---------------------|-----------------------|-------------------|
| 462 | 1039Z | 092467048 | 88-150 | Kuyavian-Pomeranian | inowrocławski       | Kruszwica             | Kruszwica         |
| 463 | 1039Z | 870578857 | 86-200 | Kuyavian-Pomeranian | chełmiński          | Chełmno               | Chełmno           |
| 464 | 1039Z | 010102193 | 01-226 | Mazovian            | Warszawa            | Wola                  | Warszawa          |
| 465 | 1039Z | 016232376 | 04-789 | Mazovian            | Warszawa            | Wawer                 | Warszawa          |
| 466 | 1039Z | 170422500 | 82-500 | Pomeranian          | kwidzyński          | Kwidzyn               | Kwidzyn           |
| 467 | 1039Z | 220817015 | 89-600 | Pomeranian          | chojnicki           | Chojnice              | Chojnice          |
| 468 | 1039Z | 241445310 | 41-800 | Silesian            | Zabrze              | Zabrze                | Zabrze            |
| 469 | 1039Z | 240562321 | 42-209 | Silesian            | Częstochowa         | Częstochowa           | Częstochowa       |
| 470 | 1039Z | 151399433 | 42-165 | Silesian            | kłobucki            | Lipie                 | Albertów          |
| 471 | 1039Z | 015244839 | 05-084 | Mazovian            | warszawski zachodni | Leszno                | Leszno            |
| 472 | 1039Z | 310324790 | 62-400 | Greater Poland      | śłupecki            | Śłupca                | Kowalewo-Parcele  |
| 473 | 1039Z | 632513530 | 62-025 | Greater Poland      | poznański           | Kostrzyn              | Siekierki Wielkie |
| 474 | 1039Z | 634370855 | 60-476 | Greater Poland      | Poznań              | Poznań                | Poznań            |
| 475 | 1039Z | 220945641 | 83-200 | Pomeranian          | starogardzki        | Starogard Gdański     | Starogard Gdański |
| 476 | 1039Z | 100654454 | 66-004 | Lubusz              | Zielona Góra        | Zielona Góra          | Zielona Góra      |
| 477 | 1039Z | 012122314 | 24-160 | Lublin              | puławski            | Wąwolnica             | Łopatki           |
| 478 | 1039Z | 385242561 | 31-125 | Lesser Poland       | krakowski           | Igołomia-Wawrzeńczyce | Tropiszów         |
| 479 | 1039Z | 388702827 | 59-330 | Lower Silesia       | lubiński            | Ścinawa               | Ścinawa           |
| 480 | 1039Z | 091488261 | 77-300 | Pomeranian          | człuchowski         | Człuchów              | Głędowo           |
| 481 | 1039Z | 932484226 | 56-420 | Lower Silesia       | oleśnicki           | Bierutów              | Karwiniec         |
| 482 | 1039Z | 140919134 | 01-226 | Mazovian            | Warszawa            | Warszawa              | Warszawa          |
| 483 | 1039Z | 366785049 | 86-031 | Kuyavian-Pomeranian | bydgoski            | Osielsko              | Osielsko          |
| 484 | 1039Z | 389090177 | 17-315 | Podlasie            | siemiatycki         | Grodzisk              | Koryciny          |
| 485 | 1039Z | 472383685 | 95-035 | Lodz                | zgierski            | Ozorków               | Opalanki          |
| 486 | 1039Z | 384229179 | 31-537 | Lesser Poland       | Kraków              | Kraków-Śródmieście    | Kraków            |
| 487 | 1039Z | 389835134 | 62-800 | Greater Poland      | Kalisz              | Kalisz                | Kalisz            |
| 488 | 1039Z | 384621405 | 21-504 | Lublin              | bialski             | Rokitno               | Rokitno           |
| 489 | 1039Z | 850237729 | 32-830 | Lesser Poland       | tarnowski           | Wojnicz               | Wielka Wieś       |
| 490 | 1039Z | 016319580 | 05-870 | Mazovian            | warszawski zachodni | Błonie                | Błonie            |

## Supplementary S3: Likert dataTable

| No. | X(1)Q1 | X(1)Q2 | X(1)Q3 | X(2)Q1 | X(2)Q2 | X(2)Q3 | X(2)Q4 | X(2)Q5 |
|-----|--------|--------|--------|--------|--------|--------|--------|--------|
| 1   | 6      | 5      | 6      | 3      | 5      | 5      | 6      | 3      |
| 2   | 6      | 4      | 4      | 5      | 6      | 5      | 4      | 5      |
| 3   | 5      | 5      | 2      | 3      | 3      | 5      | 2      | 2      |
| 4   | 6      | 6      | 3      | 4      | 5      | 5      | 5      | 4      |
| 5   | 7      | 4      | 3      | 5      | 7      | 7      | 7      | 7      |
| 6   | 7      | 6      | 7      | 5      | 7      | 7      | 6      | 4      |
| 7   | 7      | 7      | 5      | 7      | 7      | 6      | 6      | 4      |
| 8   | 7      | 5      | 2      | 3      | 3      | 5      | 5      | 1      |
| 9   | 6      | 6      | 2      | 3      | 5      | 5      | 2      | 1      |
| 10  | 5      | 5      | 1      | 3      | 3      | 5      | 3      | 1      |
| 11  | 5      | 6      | 2      | 2      | 3      | 3      | 3      | 1      |
| 12  | 6      | 5      | 2      | 3      | 5      | 5      | 5      | 1      |
| 13  | 7      | 7      | 4      | 6      | 6      | 6      | 6      | 1      |
| 14  | 6      | 6      | 6      | 3      | 3      | 5      | 5      | 1      |
| 15  | 7      | 5      | 5      | 3      | 5      | 6      | 5      | 1      |
| 16  | 6      | 5      | 3      | 2      | 4      | 5      | 5      | 2      |
| 17  | 7      | 7      | 5      | 5      | 3      | 6      | 3      | 1      |
| 18  | 6      | 5      | 5      | 6      | 7      | 5      | 6      | 4      |
| 19  | 6      | 3      | 2      | 3      | 2      | 3      | 2      | 2      |
| 20  | 6      | 5      | 2      | 3      | 3      | 5      | 2      | 1      |
| 21  | 6      | 5      | 2      | 3      | 5      | 5      | 3      | 1      |
| 22  | 7      | 7      | 6      | 5      | 6      | 6      | 6      | 2      |
| 23  | 6      | 6      | 5      | 5      | 6      | 6      | 6      | 2      |
| 24  | 7      | 6      | 5      | 6      | 6      | 6      | 6      | 3      |
| 25  | 5      | 6      | 3      | 5      | 5      | 6      | 5      | 1      |
| 26  | 6      | 6      | 3      | 5      | 5      | 6      | 5      | 1      |
| 27  | 6      | 5      | 3      | 5      | 6      | 6      | 6      | 2      |
| 28  | 6      | 5      | 6      | 5      | 6      | 6      | 6      | 3      |
| 29  | 7      | 7      | 6      | 6      | 6      | 6      | 6      | 3      |
| 30  | 6      | 7      | 6      | 6      | 6      | 6      | 6      | 2      |
| 31  | 6      | 5      | 5      | 6      | 6      | 6      | 6      | 2      |
| 32  | 6      | 5      | 5      | 3      | 5      | 6      | 3      | 2      |
| 33  | 6      | 5      | 5      | 3      | 5      | 6      | 5      | 1      |
| 34  | 6      | 5      | 5      | 5      | 5      | 6      | 6      | 2      |
| 35  | 6      | 5      | 6      | 6      | 6      | 6      | 6      | 3      |
| 36  | 6      | 7      | 5      | 6      | 6      | 6      | 6      | 2      |
| 37  | 6      | 3      | 3      | 2      | 2      | 2      | 2      | 1      |
| 38  | 6      | 5      | 3      | 3      | 6      | 6      | 5      | 2      |
| 39  | 5      | 2      | 1      | 1      | 1      | 1      | 1      | 1      |
| 40  | 6      | 7      | 6      | 7      | 7      | 7      | 6      | 3      |
| 41  | 7      | 7      | 5      | 6      | 6      | 6      | 6      | 2      |
| 42  | 7      | 6      | 6      | 6      | 6      | 6      | 5      | 2      |
| 43  | 6      | 6      | 6      | 5      | 6      | 6      | 5      | 3      |
| 44  | 6      | 3      | 2      | 2      | 2      | 3      | 2      | 2      |

## Supplementary S3: Likert dataTable

|    |   |   |   |   |   |   |   |   |
|----|---|---|---|---|---|---|---|---|
| 45 | 7 | 6 | 6 | 6 | 6 | 6 | 6 | 3 |
| 46 | 7 | 5 | 5 | 5 | 6 | 6 | 5 | 2 |
| 47 | 6 | 6 | 5 | 6 | 6 | 6 | 6 | 3 |
| 48 | 7 | 6 | 6 | 6 | 6 | 6 | 6 | 3 |
| 49 | 6 | 6 | 6 | 5 | 6 | 6 | 5 | 3 |
| 50 | 6 | 5 | 6 | 2 | 5 | 5 | 3 | 2 |
| 51 | 6 | 5 | 3 | 3 | 6 | 5 | 3 | 1 |
| 52 | 5 | 7 | 6 | 2 | 5 | 6 | 2 | 2 |
| 53 | 6 | 5 | 6 | 5 | 6 | 6 | 6 | 3 |
| 54 | 6 | 3 | 5 | 5 | 6 | 5 | 5 | 2 |
| 55 | 6 | 6 | 5 | 5 | 6 | 6 | 6 | 3 |
| 56 | 7 | 5 | 6 | 5 | 6 | 6 | 6 | 2 |
| 57 | 6 | 6 | 5 | 6 | 6 | 6 | 5 | 2 |
| 58 | 6 | 7 | 3 | 2 | 5 | 5 | 2 | 6 |
| 59 | 5 | 3 | 3 | 2 | 2 | 5 | 2 | 2 |
| 60 | 7 | 6 | 6 | 5 | 6 | 6 | 5 | 3 |
| 61 | 6 | 6 | 5 | 5 | 6 | 6 | 5 | 3 |
| 62 | 6 | 5 | 5 | 6 | 6 | 6 | 3 | 2 |
| 63 | 5 | 3 | 2 | 2 | 2 | 2 | 2 | 1 |
| 64 | 5 | 6 | 6 | 2 | 5 | 5 | 2 | 2 |
| 65 | 6 | 5 | 5 | 5 | 6 | 7 | 5 | 2 |
| 66 | 6 | 5 | 2 | 3 | 5 | 5 | 2 | 2 |
| 67 | 6 | 5 | 6 | 5 | 6 | 6 | 6 | 3 |
| 68 | 5 | 5 | 5 | 2 | 5 | 5 | 3 | 2 |
| 69 | 1 | 2 | 7 | 1 | 1 | 1 | 1 | 6 |
| 70 | 6 | 6 | 6 | 5 | 6 | 6 | 6 | 2 |
| 71 | 6 | 6 | 5 | 5 | 6 | 6 | 6 | 2 |
| 72 | 6 | 6 | 5 | 5 | 6 | 6 | 6 | 2 |
| 73 | 6 | 5 | 2 | 5 | 5 | 6 | 6 | 1 |
| 74 | 7 | 3 | 6 | 6 | 7 | 6 | 6 | 3 |
| 75 | 6 | 5 | 6 | 3 | 5 | 5 | 6 | 3 |
| 76 | 6 | 4 | 4 | 5 | 6 | 5 | 4 | 5 |
| 77 | 5 | 5 | 2 | 3 | 3 | 5 | 2 | 2 |
| 78 | 6 | 6 | 3 | 4 | 5 | 5 | 5 | 4 |
| 79 | 7 | 4 | 3 | 5 | 7 | 7 | 7 | 7 |
| 80 | 7 | 6 | 7 | 5 | 7 | 7 | 6 | 4 |
| 81 | 7 | 7 | 5 | 7 | 7 | 6 | 6 | 4 |
| 82 | 7 | 5 | 2 | 3 | 3 | 5 | 5 | 1 |
| 83 | 6 | 6 | 2 | 3 | 5 | 5 | 2 | 1 |
| 84 | 5 | 5 | 1 | 3 | 3 | 5 | 3 | 1 |
| 85 | 5 | 6 | 2 | 2 | 3 | 3 | 3 | 1 |
| 86 | 6 | 5 | 2 | 3 | 5 | 5 | 5 | 1 |
| 87 | 7 | 7 | 4 | 6 | 6 | 6 | 6 | 1 |
| 88 | 6 | 6 | 6 | 3 | 3 | 5 | 5 | 1 |
| 89 | 7 | 5 | 5 | 3 | 5 | 6 | 5 | 1 |
| 90 | 6 | 5 | 3 | 2 | 4 | 5 | 5 | 2 |
| 91 | 7 | 7 | 5 | 5 | 3 | 6 | 3 | 1 |
| 92 | 6 | 5 | 5 | 6 | 7 | 5 | 6 | 4 |



## Supplementary S3: Likert dataTable

|     |   |   |   |   |   |   |   |   |
|-----|---|---|---|---|---|---|---|---|
| 93  | 6 | 3 | 2 | 3 | 2 | 3 | 2 | 2 |
| 94  | 6 | 5 | 2 | 3 | 3 | 5 | 2 | 1 |
| 95  | 6 | 5 | 2 | 3 | 5 | 5 | 3 | 1 |
| 96  | 7 | 7 | 6 | 5 | 6 | 6 | 6 | 2 |
| 97  | 6 | 6 | 5 | 5 | 6 | 6 | 6 | 2 |
| 98  | 7 | 6 | 5 | 6 | 6 | 6 | 6 | 3 |
| 99  | 5 | 6 | 3 | 5 | 5 | 6 | 5 | 1 |
| 100 | 6 | 6 | 3 | 5 | 5 | 6 | 5 | 1 |
| 101 | 6 | 5 | 3 | 5 | 6 | 6 | 6 | 2 |
| 102 | 6 | 5 | 6 | 5 | 6 | 6 | 6 | 3 |
| 103 | 7 | 7 | 6 | 6 | 6 | 6 | 6 | 3 |
| 104 | 6 | 7 | 6 | 6 | 6 | 6 | 6 | 2 |
| 105 | 6 | 5 | 5 | 6 | 6 | 6 | 6 | 2 |
| 106 | 6 | 5 | 5 | 3 | 5 | 6 | 3 | 2 |
| 107 | 6 | 5 | 5 | 3 | 5 | 6 | 5 | 1 |
| 108 | 6 | 5 | 5 | 5 | 5 | 6 | 6 | 2 |
| 109 | 6 | 5 | 6 | 6 | 6 | 6 | 6 | 3 |
| 110 | 6 | 7 | 5 | 6 | 6 | 6 | 6 | 2 |
| 111 | 6 | 3 | 3 | 2 | 2 | 2 | 2 | 1 |
| 112 | 6 | 5 | 3 | 3 | 6 | 6 | 5 | 2 |
| 113 | 5 | 2 | 1 | 1 | 1 | 1 | 1 | 1 |
| 114 | 6 | 7 | 6 | 7 | 7 | 7 | 6 | 3 |
| 115 | 7 | 7 | 5 | 6 | 6 | 6 | 6 | 2 |
| 116 | 7 | 6 | 6 | 6 | 6 | 6 | 5 | 2 |
| 117 | 6 | 6 | 6 | 5 | 6 | 6 | 5 | 3 |
| 118 | 6 | 3 | 2 | 2 | 2 | 3 | 2 | 2 |
| 119 | 7 | 6 | 6 | 6 | 6 | 6 | 6 | 3 |
| 120 | 7 | 5 | 5 | 5 | 6 | 6 | 5 | 2 |
| 121 | 6 | 6 | 5 | 6 | 6 | 6 | 6 | 3 |
| 122 | 7 | 6 | 6 | 6 | 6 | 6 | 6 | 3 |
| 123 | 6 | 6 | 6 | 5 | 6 | 6 | 5 | 3 |
| 124 | 6 | 5 | 6 | 2 | 5 | 5 | 3 | 2 |
| 125 | 6 | 5 | 3 | 3 | 6 | 5 | 3 | 1 |
| 126 | 5 | 7 | 6 | 2 | 5 | 6 | 2 | 2 |
| 127 | 6 | 5 | 6 | 5 | 6 | 6 | 6 | 3 |
| 128 | 6 | 3 | 5 | 5 | 6 | 5 | 5 | 2 |
| 129 | 6 | 6 | 5 | 5 | 6 | 6 | 6 | 3 |
| 130 | 7 | 5 | 6 | 5 | 6 | 6 | 6 | 2 |
| 131 | 6 | 6 | 5 | 6 | 6 | 6 | 5 | 2 |
| 132 | 6 | 7 | 3 | 2 | 5 | 5 | 2 | 6 |
| 133 | 5 | 3 | 3 | 2 | 2 | 5 | 2 | 2 |
| 134 | 7 | 6 | 6 | 5 | 6 | 6 | 5 | 3 |
| 135 | 6 | 6 | 5 | 5 | 6 | 6 | 5 | 3 |
| 136 | 6 | 5 | 5 | 6 | 6 | 6 | 3 | 2 |
| 137 | 5 | 3 | 2 | 2 | 2 | 2 | 2 | 1 |
| 138 | 5 | 6 | 6 | 2 | 5 | 5 | 2 | 2 |
| 139 | 6 | 5 | 5 | 5 | 6 | 7 | 5 | 2 |
| 140 | 6 | 5 | 2 | 3 | 5 | 5 | 2 | 2 |

Supplementary S3: Likert dataTable

|     |   |   |   |   |   |   |   |   |
|-----|---|---|---|---|---|---|---|---|
| 141 | 6 | 5 | 6 | 5 | 6 | 6 | 6 | 3 |
| 142 | 5 | 5 | 5 | 2 | 5 | 5 | 3 | 2 |
| 143 | 1 | 2 | 7 | 1 | 1 | 1 | 1 | 6 |
| 144 | 6 | 6 | 6 | 5 | 6 | 6 | 6 | 2 |
| 145 | 6 | 6 | 5 | 5 | 6 | 6 | 6 | 2 |
| 146 | 6 | 6 | 5 | 5 | 6 | 6 | 6 | 2 |
| 147 | 6 | 5 | 2 | 5 | 5 | 6 | 6 | 1 |
| 148 | 7 | 3 | 6 | 6 | 7 | 6 | 6 | 3 |
| 149 | 6 | 5 | 6 | 3 | 5 | 5 | 6 | 3 |
| 150 | 6 | 4 | 4 | 5 | 6 | 5 | 4 | 5 |
| 151 | 5 | 5 | 2 | 3 | 3 | 5 | 2 | 2 |
| 152 | 6 | 6 | 3 | 4 | 5 | 5 | 5 | 4 |
| 153 | 7 | 4 | 3 | 5 | 7 | 7 | 7 | 7 |
| 154 | 7 | 6 | 7 | 5 | 7 | 7 | 6 | 4 |
| 155 | 7 | 7 | 5 | 7 | 7 | 6 | 6 | 4 |
| 156 | 7 | 5 | 2 | 3 | 3 | 5 | 5 | 1 |
| 157 | 6 | 6 | 2 | 3 | 5 | 5 | 2 | 1 |
| 158 | 5 | 5 | 1 | 3 | 3 | 5 | 3 | 1 |
| 159 | 5 | 6 | 2 | 2 | 3 | 3 | 3 | 1 |
| 160 | 6 | 5 | 2 | 3 | 5 | 5 | 5 | 1 |
| 161 | 7 | 7 | 4 | 6 | 6 | 6 | 6 | 1 |
| 162 | 6 | 6 | 6 | 3 | 3 | 5 | 5 | 1 |
| 163 | 7 | 5 | 5 | 3 | 5 | 6 | 5 | 1 |
| 164 | 6 | 5 | 3 | 2 | 4 | 5 | 5 | 2 |
| 165 | 7 | 7 | 5 | 5 | 3 | 6 | 3 | 1 |
| 166 | 6 | 5 | 5 | 6 | 7 | 5 | 6 | 4 |
| 167 | 6 | 3 | 2 | 3 | 2 | 3 | 2 | 2 |
| 168 | 6 | 5 | 2 | 3 | 3 | 5 | 2 | 1 |
| 169 | 6 | 5 | 2 | 3 | 5 | 5 | 3 | 1 |
| 170 | 7 | 7 | 6 | 5 | 6 | 6 | 6 | 2 |
| 171 | 6 | 6 | 5 | 5 | 6 | 6 | 6 | 2 |
| 172 | 7 | 6 | 5 | 6 | 6 | 6 | 6 | 3 |
| 173 | 5 | 6 | 3 | 5 | 5 | 6 | 5 | 1 |
| 174 | 6 | 6 | 3 | 5 | 5 | 6 | 5 | 1 |
| 175 | 6 | 5 | 3 | 5 | 6 | 6 | 6 | 2 |
| 176 | 6 | 5 | 6 | 5 | 6 | 6 | 6 | 3 |
| 177 | 7 | 7 | 6 | 6 | 6 | 6 | 6 | 3 |
| 178 | 6 | 7 | 6 | 6 | 6 | 6 | 6 | 2 |
| 179 | 6 | 5 | 5 | 6 | 6 | 6 | 6 | 2 |
| 180 | 6 | 5 | 5 | 3 | 5 | 6 | 3 | 2 |
| 181 | 6 | 5 | 5 | 3 | 5 | 6 | 5 | 1 |
| 182 | 6 | 5 | 5 | 5 | 5 | 6 | 6 | 2 |
| 183 | 6 | 5 | 6 | 6 | 6 | 6 | 6 | 3 |
| 184 | 6 | 7 | 5 | 6 | 6 | 6 | 6 | 2 |
| 185 | 6 | 3 | 3 | 2 | 2 | 2 | 2 | 1 |
| 186 | 6 | 5 | 3 | 3 | 6 | 6 | 5 | 2 |
| 187 | 5 | 2 | 1 | 1 | 1 | 1 | 1 | 1 |
| 188 | 6 | 7 | 6 | 7 | 7 | 7 | 6 | 3 |

## Supplementary S3: Likert dataTable

| 189 | 7      | 7      | 5      | 6      | 6      | 6      | 6      | 2      |
|-----|--------|--------|--------|--------|--------|--------|--------|--------|
| 190 | 7      | 6      | 6      | 6      | 6      | 6      | 5      | 2      |
| 191 | 6      | 6      | 6      | 5      | 6      | 6      | 5      | 3      |
| 192 | 6      | 3      | 2      | 2      | 2      | 3      | 2      | 2      |
| 193 | 7      | 6      | 6      | 6      | 6      | 6      | 6      | 3      |
| 194 | 7      | 5      | 5      | 5      | 6      | 6      | 5      | 2      |
| 195 | 6      | 6      | 5      | 6      | 6      | 6      | 6      | 3      |
| 196 | 7      | 6      | 6      | 6      | 6      | 6      | 6      | 3      |
| 197 | 6      | 6      | 6      | 5      | 6      | 6      | 5      | 3      |
| 198 | 6      | 5      | 6      | 2      | 5      | 5      | 3      | 2      |
| 199 | 6      | 5      | 3      | 3      | 6      | 5      | 3      | 1      |
| 200 | 5      | 7      | 6      | 2      | 5      | 6      | 2      | 2      |
| 201 | 6      | 5      | 6      | 5      | 6      | 6      | 6      | 3      |
| 202 | 6      | 3      | 5      | 5      | 6      | 5      | 5      | 2      |
| 203 | 6      | 6      | 5      | 5      | 6      | 6      | 6      | 3      |
| 204 | 7      | 5      | 6      | 5      | 6      | 6      | 6      | 2      |
| 205 | 6      | 6      | 5      | 6      | 6      | 6      | 5      | 2      |
| 206 | 6      | 7      | 3      | 2      | 5      | 5      | 2      | 6      |
| 207 | 5      | 3      | 3      | 2      | 2      | 5      | 2      | 2      |
| 208 | 7      | 6      | 6      | 5      | 6      | 6      | 5      | 3      |
| 209 | 6      | 6      | 5      | 5      | 6      | 6      | 5      | 3      |
| 210 | 6      | 5      | 5      | 6      | 6      | 6      | 3      | 2      |
| 211 | 5      | 3      | 2      | 2      | 2      | 2      | 2      | 1      |
| 212 | 5      | 6      | 6      | 2      | 5      | 5      | 2      | 2      |
| 213 | 6      | 5      | 5      | 5      | 6      | 7      | 5      | 2      |
| 214 | 6      | 5      | 2      | 3      | 5      | 5      | 2      | 2      |
| 215 | 6      | 5      | 6      | 5      | 6      | 6      | 6      | 3      |
| 216 | 5      | 5      | 5      | 2      | 5      | 5      | 3      | 2      |
| No. | X(2)Q6 | X(2)Q7 | X(3)Q1 | X(3)Q2 | X(4)Q1 | X(4)Q2 | X(4)Q3 | X(5)Q1 |
| 1   | 5      | 2      | 2      | 3      | 6      | 6      | 5      | 6      |
| 2   | 4      | 4      | 4      | 5      | 5      | 6      | 5      | 7      |
| 3   | 3      | 2      | 1      | 1      | 4      | 5      | 5      | 6      |
| 4   | 5      | 4      | 4      | 3      | 5      | 6      | 5      | 7      |
| 5   | 7      | 7      | 3      | 4      | 7      | 7      | 7      | 7      |
| 6   | 7      | 5      | 4      | 4      | 6      | 7      | 7      | 7      |
| 7   | 7      | 5      | 5      | 3      | 6      | 7      | 5      | 7      |
| 8   | 5      | 3      | 2      | 1      | 5      | 7      | 5      | 7      |
| 9   | 2      | 2      | 1      | 1      | 5      | 6      | 3      | 7      |
| 10  | 2      | 2      | 1      | 1      | 4      | 5      | 3      | 6      |
| 11  | 3      | 3      | 1      | 1      | 5      | 5      | 5      | 7      |
| 12  | 3      | 2      | 1      | 1      | 5      | 6      | 5      | 7      |
| 13  | 6      | 5      | 3      | 2      | 6      | 7      | 6      | 7      |
| 14  | 6      | 1      | 1      | 1      | 5      | 6      | 5      | 7      |
| 15  | 5      | 2      | 1      | 1      | 5      | 7      | 7      | 7      |
| 16  | 3      | 3      | 3      | 2      | 5      | 6      | 5      | 6      |
| 17  | 3      | 3      | 2      | 2      | 5      | 7      | 5      | 6      |

Supplementary S3: Likert dataTable

|    |   |   |   |   |   |   |   |   |
|----|---|---|---|---|---|---|---|---|
| 18 | 7 | 7 | 7 | 7 | 6 | 6 | 6 | 7 |
| 19 | 3 | 3 | 2 | 2 | 5 | 6 | 6 | 6 |
| 20 | 2 | 2 | 1 | 1 | 5 | 6 | 5 | 7 |
| 21 | 3 | 2 | 2 | 2 | 5 | 6 | 5 | 6 |
| 22 | 6 | 5 | 6 | 5 | 7 | 7 | 7 | 7 |
| 23 | 6 | 5 | 5 | 2 | 6 | 6 | 6 | 7 |
| 24 | 6 | 5 | 5 | 2 | 6 | 7 | 6 | 7 |
| 25 | 2 | 2 | 2 | 2 | 5 | 5 | 5 | 6 |
| 26 | 3 | 3 | 2 | 2 | 6 | 6 | 6 | 6 |
| 27 | 3 | 3 | 2 | 2 | 6 | 6 | 6 | 6 |
| 28 | 6 | 3 | 3 | 2 | 6 | 6 | 6 | 6 |
| 29 | 6 | 6 | 5 | 3 | 7 | 7 | 6 | 7 |
| 30 | 5 | 3 | 3 | 2 | 6 | 6 | 5 | 6 |
| 31 | 6 | 3 | 2 | 2 | 6 | 6 | 6 | 6 |
| 32 | 3 | 2 | 2 | 2 | 5 | 6 | 5 | 6 |
| 33 | 3 | 2 | 2 | 2 | 5 | 6 | 5 | 7 |
| 34 | 3 | 2 | 2 | 2 | 6 | 6 | 5 | 6 |
| 35 | 6 | 3 | 3 | 1 | 6 | 6 | 6 | 7 |
| 36 | 6 | 2 | 2 | 2 | 6 | 6 | 6 | 7 |
| 37 | 2 | 2 | 2 | 2 | 5 | 6 | 2 | 6 |
| 38 | 3 | 2 | 2 | 2 | 6 | 6 | 5 | 7 |
| 39 | 1 | 1 | 1 | 1 | 2 | 5 | 1 | 5 |
| 40 | 7 | 6 | 5 | 3 | 6 | 6 | 5 | 7 |
| 41 | 5 | 2 | 2 | 2 | 6 | 7 | 5 | 6 |
| 42 | 6 | 2 | 5 | 2 | 6 | 7 | 5 | 6 |
| 43 | 5 | 3 | 2 | 2 | 6 | 6 | 5 | 6 |
| 44 | 2 | 2 | 2 | 2 | 5 | 6 | 5 | 6 |
| 45 | 5 | 3 | 3 | 2 | 6 | 7 | 5 | 7 |
| 46 | 5 | 2 | 2 | 2 | 6 | 7 | 5 | 6 |
| 47 | 6 | 2 | 2 | 2 | 6 | 6 | 5 | 6 |
| 48 | 5 | 2 | 3 | 3 | 6 | 7 | 5 | 7 |
| 49 | 6 | 2 | 6 | 2 | 6 | 6 | 5 | 7 |
| 50 | 3 | 2 | 1 | 1 | 6 | 6 | 5 | 6 |
| 51 | 3 | 1 | 2 | 1 | 5 | 6 | 5 | 7 |
| 52 | 2 | 1 | 1 | 1 | 5 | 5 | 3 | 6 |
| 53 | 6 | 3 | 3 | 5 | 6 | 6 | 5 | 7 |
| 54 | 5 | 2 | 2 | 2 | 5 | 6 | 5 | 6 |
| 55 | 6 | 5 | 3 | 2 | 5 | 6 | 5 | 7 |
| 56 | 5 | 1 | 2 | 1 | 5 | 7 | 5 | 7 |
| 57 | 5 | 2 | 3 | 3 | 5 | 6 | 5 | 7 |
| 58 | 5 | 2 | 3 | 1 | 5 | 6 | 3 | 6 |
| 59 | 2 | 2 | 2 | 1 | 5 | 5 | 1 | 5 |
| 60 | 5 | 3 | 3 | 2 | 6 | 7 | 5 | 7 |
| 61 | 6 | 3 | 6 | 3 | 6 | 6 | 5 | 7 |
| 62 | 5 | 2 | 2 | 2 | 6 | 6 | 6 | 7 |
| 63 | 2 | 2 | 2 | 2 | 5 | 5 | 2 | 6 |
| 64 | 3 | 2 | 3 | 1 | 5 | 5 | 3 | 6 |
| 65 | 5 | 3 | 3 | 2 | 6 | 6 | 5 | 7 |

## Supplementary S3: Likert dataTable

|     |   |   |   |   |   |   |   |   |
|-----|---|---|---|---|---|---|---|---|
| 66  | 2 | 2 | 2 | 1 | 5 | 6 | 2 | 6 |
| 67  | 5 | 2 | 5 | 1 | 6 | 6 | 5 | 7 |
| 68  | 2 | 2 | 3 | 2 | 5 | 5 | 1 | 6 |
| 69  | 1 | 6 | 7 | 6 | 1 | 1 | 1 | 5 |
| 70  | 6 | 6 | 5 | 3 | 6 | 6 | 3 | 7 |
| 71  | 6 | 5 | 5 | 2 | 6 | 6 | 5 | 7 |
| 72  | 5 | 5 | 3 | 2 | 2 | 6 | 5 | 7 |
| 73  | 6 | 5 | 3 | 1 | 5 | 6 | 3 | 6 |
| 74  | 6 | 6 | 5 | 2 | 6 | 7 | 5 | 7 |
| 75  | 5 | 2 | 2 | 3 | 6 | 6 | 5 | 6 |
| 76  | 4 | 4 | 4 | 5 | 5 | 6 | 5 | 7 |
| 77  | 3 | 2 | 1 | 1 | 4 | 5 | 5 | 6 |
| 78  | 5 | 4 | 4 | 3 | 5 | 6 | 5 | 7 |
| 79  | 7 | 7 | 3 | 4 | 7 | 7 | 7 | 7 |
| 80  | 7 | 5 | 4 | 4 | 6 | 7 | 7 | 7 |
| 81  | 7 | 5 | 5 | 3 | 6 | 7 | 5 | 7 |
| 82  | 5 | 3 | 2 | 1 | 5 | 7 | 5 | 7 |
| 83  | 2 | 2 | 1 | 1 | 5 | 6 | 3 | 7 |
| 84  | 2 | 2 | 1 | 1 | 4 | 5 | 3 | 6 |
| 85  | 3 | 3 | 1 | 1 | 5 | 5 | 5 | 7 |
| 86  | 3 | 2 | 1 | 1 | 5 | 6 | 5 | 7 |
| 87  | 6 | 5 | 3 | 2 | 6 | 7 | 6 | 7 |
| 88  | 6 | 1 | 1 | 1 | 5 | 6 | 5 | 7 |
| 89  | 5 | 2 | 1 | 1 | 5 | 7 | 7 | 7 |
| 90  | 3 | 3 | 3 | 2 | 5 | 6 | 5 | 6 |
| 91  | 3 | 3 | 2 | 2 | 5 | 7 | 5 | 6 |
| 92  | 7 | 7 | 7 | 7 | 6 | 6 | 6 | 7 |
| 93  | 3 | 3 | 2 | 2 | 5 | 6 | 6 | 6 |
| 94  | 2 | 2 | 1 | 1 | 5 | 6 | 5 | 7 |
| 95  | 3 | 2 | 2 | 2 | 5 | 6 | 5 | 6 |
| 96  | 6 | 5 | 6 | 5 | 7 | 7 | 7 | 7 |
| 97  | 6 | 5 | 5 | 2 | 6 | 6 | 6 | 7 |
| 98  | 6 | 5 | 5 | 2 | 6 | 7 | 6 | 7 |
| 99  | 2 | 2 | 2 | 2 | 5 | 5 | 5 | 6 |
| 100 | 3 | 3 | 2 | 2 | 6 | 6 | 6 | 6 |
| 101 | 3 | 3 | 2 | 2 | 6 | 6 | 6 | 6 |
| 102 | 6 | 3 | 3 | 2 | 6 | 6 | 6 | 6 |
| 103 | 6 | 6 | 5 | 3 | 7 | 7 | 6 | 7 |
| 104 | 5 | 3 | 3 | 2 | 6 | 6 | 5 | 6 |
| 105 | 6 | 3 | 2 | 2 | 6 | 6 | 6 | 6 |
| 106 | 3 | 2 | 2 | 2 | 5 | 6 | 5 | 6 |
| 107 | 3 | 2 | 2 | 2 | 5 | 6 | 5 | 7 |
| 108 | 3 | 2 | 2 | 2 | 6 | 6 | 5 | 6 |
| 109 | 6 | 3 | 3 | 1 | 6 | 6 | 6 | 7 |
| 110 | 6 | 2 | 2 | 2 | 6 | 6 | 6 | 7 |
| 111 | 2 | 2 | 2 | 2 | 5 | 6 | 2 | 6 |
| 112 | 3 | 2 | 2 | 2 | 6 | 6 | 5 | 7 |
| 113 | 1 | 1 | 1 | 1 | 2 | 5 | 1 | 5 |

## Supplementary S3: Likert dataTable

|     |   |   |   |   |   |   |   |   |
|-----|---|---|---|---|---|---|---|---|
| 114 | 7 | 6 | 5 | 3 | 6 | 6 | 5 | 7 |
| 115 | 5 | 2 | 2 | 2 | 6 | 7 | 5 | 6 |
| 116 | 6 | 2 | 5 | 2 | 6 | 7 | 5 | 6 |
| 117 | 5 | 3 | 2 | 2 | 6 | 6 | 5 | 6 |
| 118 | 2 | 2 | 2 | 2 | 5 | 6 | 5 | 6 |
| 119 | 5 | 3 | 3 | 2 | 6 | 7 | 5 | 7 |
| 120 | 5 | 2 | 2 | 2 | 6 | 7 | 5 | 6 |
| 121 | 6 | 2 | 2 | 2 | 6 | 6 | 5 | 6 |
| 122 | 5 | 2 | 3 | 3 | 6 | 7 | 5 | 7 |
| 123 | 6 | 2 | 6 | 2 | 6 | 6 | 5 | 7 |
| 124 | 3 | 2 | 1 | 1 | 6 | 6 | 5 | 6 |
| 125 | 3 | 1 | 2 | 1 | 5 | 6 | 5 | 7 |
| 126 | 2 | 1 | 1 | 1 | 5 | 5 | 3 | 6 |
| 127 | 6 | 3 | 3 | 5 | 6 | 6 | 5 | 7 |
| 128 | 5 | 2 | 2 | 2 | 5 | 6 | 5 | 6 |
| 129 | 6 | 5 | 3 | 2 | 5 | 6 | 5 | 7 |
| 130 | 5 | 1 | 2 | 1 | 5 | 7 | 5 | 7 |
| 131 | 5 | 2 | 3 | 3 | 5 | 6 | 5 | 7 |
| 132 | 5 | 2 | 3 | 1 | 5 | 6 | 3 | 6 |
| 133 | 2 | 2 | 2 | 1 | 5 | 5 | 1 | 5 |
| 134 | 5 | 3 | 3 | 2 | 6 | 7 | 5 | 7 |
| 135 | 6 | 3 | 6 | 3 | 6 | 6 | 5 | 7 |
| 136 | 5 | 2 | 2 | 2 | 6 | 6 | 6 | 7 |
| 137 | 2 | 2 | 2 | 2 | 5 | 5 | 2 | 6 |
| 138 | 3 | 2 | 3 | 1 | 5 | 5 | 3 | 6 |
| 139 | 5 | 3 | 3 | 2 | 6 | 6 | 5 | 7 |
| 140 | 2 | 2 | 2 | 1 | 5 | 6 | 2 | 6 |
| 141 | 5 | 2 | 5 | 1 | 6 | 6 | 5 | 7 |
| 142 | 2 | 2 | 3 | 2 | 5 | 5 | 1 | 6 |
| 143 | 1 | 6 | 7 | 6 | 1 | 1 | 1 | 5 |
| 144 | 6 | 6 | 5 | 3 | 6 | 6 | 3 | 7 |
| 145 | 6 | 5 | 5 | 2 | 6 | 6 | 5 | 7 |
| 146 | 5 | 5 | 3 | 2 | 2 | 6 | 5 | 7 |
| 147 | 6 | 5 | 3 | 1 | 5 | 6 | 3 | 6 |
| 148 | 6 | 6 | 5 | 2 | 6 | 7 | 5 | 7 |
| 149 | 5 | 2 | 2 | 3 | 6 | 6 | 5 | 6 |
| 150 | 4 | 4 | 4 | 5 | 5 | 6 | 5 | 7 |
| 151 | 3 | 2 | 1 | 1 | 4 | 5 | 5 | 6 |
| 152 | 5 | 4 | 4 | 3 | 5 | 6 | 5 | 7 |
| 153 | 7 | 7 | 3 | 4 | 7 | 7 | 7 | 7 |
| 154 | 7 | 5 | 4 | 4 | 6 | 7 | 7 | 7 |
| 155 | 7 | 5 | 5 | 3 | 6 | 7 | 5 | 7 |
| 156 | 5 | 3 | 2 | 1 | 5 | 7 | 5 | 7 |
| 157 | 2 | 2 | 1 | 1 | 5 | 6 | 3 | 7 |
| 158 | 2 | 2 | 1 | 1 | 4 | 5 | 3 | 6 |
| 159 | 3 | 3 | 1 | 1 | 5 | 5 | 5 | 7 |
| 160 | 3 | 2 | 1 | 1 | 5 | 6 | 5 | 7 |
| 161 | 6 | 5 | 3 | 2 | 6 | 7 | 6 | 7 |

Supplementary S3: Likert dataTable

|     |   |   |   |   |   |   |   |   |
|-----|---|---|---|---|---|---|---|---|
| 162 | 6 | 1 | 1 | 1 | 5 | 6 | 5 | 7 |
| 163 | 5 | 2 | 1 | 1 | 5 | 7 | 7 | 7 |
| 164 | 3 | 3 | 3 | 2 | 5 | 6 | 5 | 6 |
| 165 | 3 | 3 | 2 | 2 | 5 | 7 | 5 | 6 |
| 166 | 7 | 7 | 7 | 7 | 6 | 6 | 6 | 7 |
| 167 | 3 | 3 | 2 | 2 | 5 | 6 | 6 | 6 |
| 168 | 2 | 2 | 1 | 1 | 5 | 6 | 5 | 7 |
| 169 | 3 | 2 | 2 | 2 | 5 | 6 | 5 | 6 |
| 170 | 6 | 5 | 6 | 5 | 7 | 7 | 7 | 7 |
| 171 | 6 | 5 | 5 | 2 | 6 | 6 | 6 | 7 |
| 172 | 6 | 5 | 5 | 2 | 6 | 7 | 6 | 7 |
| 173 | 2 | 2 | 2 | 2 | 5 | 5 | 5 | 6 |
| 174 | 3 | 3 | 2 | 2 | 6 | 6 | 6 | 6 |
| 175 | 3 | 3 | 2 | 2 | 6 | 6 | 6 | 6 |
| 176 | 6 | 3 | 3 | 2 | 6 | 6 | 6 | 6 |
| 177 | 6 | 6 | 5 | 3 | 7 | 7 | 6 | 7 |
| 178 | 5 | 3 | 3 | 2 | 6 | 6 | 5 | 6 |
| 179 | 6 | 3 | 2 | 2 | 6 | 6 | 6 | 6 |
| 180 | 3 | 2 | 2 | 2 | 5 | 6 | 5 | 6 |
| 181 | 3 | 2 | 2 | 2 | 5 | 6 | 5 | 7 |
| 182 | 3 | 2 | 2 | 2 | 6 | 6 | 5 | 6 |
| 183 | 6 | 3 | 3 | 1 | 6 | 6 | 6 | 7 |
| 184 | 6 | 2 | 2 | 2 | 6 | 6 | 6 | 7 |
| 185 | 2 | 2 | 2 | 2 | 5 | 6 | 2 | 6 |
| 186 | 3 | 2 | 2 | 2 | 6 | 6 | 5 | 7 |
| 187 | 1 | 1 | 1 | 1 | 2 | 5 | 1 | 5 |
| 188 | 7 | 6 | 5 | 3 | 6 | 6 | 5 | 7 |
| 189 | 5 | 2 | 2 | 2 | 6 | 7 | 5 | 6 |
| 190 | 6 | 2 | 5 | 2 | 6 | 7 | 5 | 6 |
| 191 | 5 | 3 | 2 | 2 | 6 | 6 | 5 | 6 |
| 192 | 2 | 2 | 2 | 2 | 5 | 6 | 5 | 6 |
| 193 | 5 | 3 | 3 | 2 | 6 | 7 | 5 | 7 |
| 194 | 5 | 2 | 2 | 2 | 6 | 7 | 5 | 6 |
| 195 | 6 | 2 | 2 | 2 | 6 | 6 | 5 | 6 |
| 196 | 5 | 2 | 3 | 3 | 6 | 7 | 5 | 7 |
| 197 | 6 | 2 | 6 | 2 | 6 | 6 | 5 | 7 |
| 198 | 3 | 2 | 1 | 1 | 6 | 6 | 5 | 6 |
| 199 | 3 | 1 | 2 | 1 | 5 | 6 | 5 | 7 |
| 200 | 2 | 1 | 1 | 1 | 5 | 5 | 3 | 6 |
| 201 | 6 | 3 | 3 | 5 | 6 | 6 | 5 | 7 |
| 202 | 5 | 2 | 2 | 2 | 5 | 6 | 5 | 6 |
| 203 | 6 | 5 | 3 | 2 | 5 | 6 | 5 | 7 |
| 204 | 5 | 1 | 2 | 1 | 5 | 7 | 5 | 7 |
| 205 | 5 | 2 | 3 | 3 | 5 | 6 | 5 | 7 |
| 206 | 5 | 2 | 3 | 1 | 5 | 6 | 3 | 6 |
| 207 | 2 | 2 | 2 | 1 | 5 | 5 | 1 | 5 |
| 208 | 5 | 3 | 3 | 2 | 6 | 7 | 5 | 7 |
| 209 | 6 | 3 | 6 | 3 | 6 | 6 | 5 | 7 |

## Supplementary S3: Likert dataTable

|     |   |   |   |   |   |   |   |   |
|-----|---|---|---|---|---|---|---|---|
| 210 | 5 | 2 | 2 | 2 | 6 | 6 | 6 | 7 |
| 211 | 2 | 2 | 2 | 2 | 5 | 5 | 2 | 6 |
| 212 | 3 | 2 | 3 | 1 | 5 | 5 | 3 | 6 |
| 213 | 5 | 3 | 3 | 2 | 6 | 6 | 5 | 7 |
| 214 | 2 | 2 | 2 | 1 | 5 | 6 | 2 | 6 |
| 215 | 5 | 2 | 5 | 1 | 6 | 6 | 5 | 7 |
| 216 | 2 | 2 | 3 | 2 | 5 | 5 | 1 | 6 |

| No. | X(5)Q2 | X(5)Q3 | X(5)Q4 | X(5)Q5 | X(5)Q6 | X(6)Q1 | X(6)Q2 | X(6)Q3 |
|-----|--------|--------|--------|--------|--------|--------|--------|--------|
| 1   | 7      | 7      | 3      | 2      | 1      | 2      | 5      | 4      |
| 2   | 6      | 5      | 5      | 5      | 4      | 4      | 4      | 4      |
| 3   | 6      | 3      | 2      | 1      | 1      | 2      | 2      | 3      |
| 4   | 6      | 4      | 3      | 3      | 1      | 3      | 3      | 3      |
| 5   | 7      | 7      | 3      | 2      | 1      | 1      | 4      | 3      |
| 6   | 7      | 5      | 5      | 7      | 3      | 4      | 5      | 4      |
| 7   | 7      | 6      | 5      | 6      | 1      | 1      | 3      | 5      |
| 8   | 7      | 5      | 1      | 1      | 1      | 1      | 3      | 1      |
| 9   | 7      | 6      | 2      | 1      | 1      | 2      | 2      | 1      |
| 10  | 6      | 3      | 2      | 1      | 1      | 1      | 1      | 1      |
| 11  | 7      | 6      | 1      | 1      | 1      | 1      | 3      | 3      |
| 12  | 6      | 5      | 1      | 1      | 1      | 1      | 2      | 2      |
| 13  | 7      | 6      | 2      | 2      | 1      | 1      | 2      | 3      |
| 14  | 6      | 1      | 1      | 1      | 1      | 1      | 3      | 2      |
| 15  | 6      | 6      | 1      | 1      | 1      | 1      | 2      | 2      |
| 16  | 6      | 5      | 3      | 2      | 1      | 1      | 2      | 5      |
| 17  | 6      | 5      | 2      | 2      | 1      | 2      | 2      | 5      |
| 18  | 5      | 6      | 5      | 5      | 4      | 3      | 3      | 6      |
| 19  | 5      | 5      | 2      | 2      | 2      | 2      | 2      | 5      |
| 20  | 6      | 6      | 1      | 1      | 1      | 2      | 1      | 3      |
| 21  | 6      | 5      | 2      | 2      | 1      | 1      | 2      | 3      |
| 22  | 6      | 6      | 5      | 3      | 2      | 3      | 5      | 5      |
| 23  | 6      | 6      | 6      | 5      | 2      | 3      | 6      | 6      |
| 24  | 6      | 6      | 6      | 3      | 1      | 2      | 5      | 5      |
| 25  | 6      | 5      | 2      | 2      | 1      | 2      | 2      | 2      |
| 26  | 6      | 3      | 1      | 2      | 1      | 2      | 2      | 3      |
| 27  | 6      | 5      | 2      | 2      | 1      | 2      | 3      | 2      |
| 28  | 6      | 5      | 2      | 2      | 1      | 2      | 3      | 3      |
| 29  | 7      | 6      | 3      | 3      | 2      | 3      | 6      | 6      |
| 30  | 6      | 5      | 2      | 2      | 1      | 3      | 6      | 5      |
| 31  | 6      | 5      | 2      | 2      | 1      | 2      | 5      | 5      |
| 32  | 6      | 5      | 2      | 2      | 1      | 2      | 3      | 2      |
| 33  | 6      | 5      | 2      | 2      | 1      | 2      | 3      | 2      |
| 34  | 6      | 5      | 2      | 2      | 2      | 3      | 3      | 2      |
| 35  | 7      | 6      | 2      | 2      | 2      | 3      | 6      | 5      |
| 36  | 6      | 5      | 2      | 2      | 2      | 3      | 6      | 5      |
| 37  | 6      | 2      | 1      | 1      | 1      | 2      | 2      | 2      |
| 38  | 6      | 5      | 2      | 2      | 1      | 2      | 2      | 3      |



## Supplementary S3: Likert dataTable

|    |   |   |   |   |   |   |   |   |
|----|---|---|---|---|---|---|---|---|
| 39 | 2 | 2 | 1 | 1 | 2 | 3 | 6 | 5 |
| 40 | 7 | 6 | 2 | 2 | 2 | 3 | 6 | 6 |
| 41 | 6 | 5 | 2 | 2 | 1 | 2 | 5 | 5 |
| 42 | 6 | 5 | 2 | 2 | 2 | 2 | 3 | 3 |
| 43 | 6 | 5 | 2 | 2 | 1 | 1 | 5 | 2 |
| 44 | 5 | 2 | 2 | 2 | 1 | 2 | 2 | 2 |
| 45 | 6 | 6 | 2 | 1 | 1 | 2 | 5 | 5 |
| 46 | 5 | 5 | 2 | 2 | 1 | 2 | 3 | 2 |
| 47 | 6 | 5 | 2 | 2 | 1 | 2 | 2 | 2 |
| 48 | 6 | 6 | 2 | 2 | 1 | 2 | 5 | 5 |
| 49 | 6 | 5 | 3 | 2 | 1 | 2 | 6 | 6 |
| 50 | 6 | 5 | 2 | 2 | 2 | 2 | 5 | 5 |
| 51 | 6 | 3 | 2 | 2 | 1 | 2 | 5 | 5 |
| 52 | 5 | 3 | 2 | 2 | 1 | 2 | 2 | 2 |
| 53 | 6 | 5 | 2 | 2 | 2 | 3 | 5 | 5 |
| 54 | 5 | 5 | 3 | 2 | 1 | 3 | 3 | 2 |
| 55 | 6 | 5 | 1 | 2 | 1 | 2 | 3 | 3 |
| 56 | 6 | 5 | 1 | 2 | 1 | 3 | 3 | 3 |
| 57 | 6 | 5 | 1 | 1 | 1 | 2 | 3 | 2 |
| 58 | 6 | 5 | 1 | 2 | 1 | 2 | 2 | 2 |
| 59 | 2 | 2 | 1 | 1 | 1 | 1 | 1 | 2 |
| 60 | 6 | 6 | 2 | 1 | 1 | 3 | 6 | 5 |
| 61 | 6 | 6 | 2 | 2 | 2 | 2 | 2 | 2 |
| 62 | 6 | 5 | 2 | 2 | 1 | 2 | 3 | 2 |
| 63 | 6 | 3 | 2 | 2 | 1 | 2 | 2 | 2 |
| 64 | 5 | 3 | 2 | 2 | 1 | 2 | 2 | 2 |
| 65 | 6 | 6 | 2 | 2 | 1 | 2 | 5 | 5 |
| 66 | 6 | 3 | 2 | 2 | 1 | 2 | 2 | 2 |
| 67 | 6 | 6 | 1 | 1 | 1 | 2 | 5 | 5 |
| 68 | 5 | 3 | 2 | 2 | 1 | 2 | 2 | 2 |
| 69 | 3 | 1 | 7 | 6 | 3 | 5 | 7 | 7 |
| 70 | 6 | 5 | 2 | 2 | 1 | 3 | 5 | 5 |
| 71 | 6 | 5 | 2 | 2 | 1 | 3 | 5 | 6 |
| 72 | 6 | 5 | 2 | 2 | 1 | 3 | 5 | 5 |
| 73 | 5 | 5 | 2 | 2 | 1 | 3 | 5 | 5 |
| 74 | 6 | 3 | 2 | 2 | 1 | 2 | 6 | 6 |
| 75 | 7 | 7 | 3 | 2 | 1 | 2 | 5 | 4 |
| 76 | 6 | 5 | 5 | 5 | 4 | 4 | 4 | 4 |
| 77 | 6 | 3 | 2 | 1 | 1 | 2 | 2 | 3 |
| 78 | 6 | 4 | 3 | 3 | 1 | 3 | 3 | 3 |
| 79 | 7 | 7 | 3 | 2 | 1 | 1 | 4 | 3 |
| 80 | 7 | 5 | 5 | 7 | 3 | 4 | 5 | 4 |
| 81 | 7 | 6 | 5 | 6 | 1 | 1 | 3 | 5 |
| 82 | 7 | 5 | 1 | 1 | 1 | 1 | 3 | 1 |
| 83 | 7 | 6 | 2 | 1 | 1 | 2 | 2 | 1 |
| 84 | 6 | 3 | 2 | 1 | 1 | 1 | 1 | 1 |
| 85 | 7 | 6 | 1 | 1 | 1 | 1 | 3 | 3 |
| 86 | 6 | 5 | 1 | 1 | 1 | 1 | 2 | 2 |

Supplementary S3: Likert dataTable

|     |   |   |   |   |   |   |   |   |
|-----|---|---|---|---|---|---|---|---|
| 87  | 7 | 6 | 2 | 2 | 1 | 1 | 2 | 3 |
| 88  | 6 | 1 | 1 | 1 | 1 | 1 | 3 | 2 |
| 89  | 6 | 6 | 1 | 1 | 1 | 1 | 2 | 2 |
| 90  | 6 | 5 | 3 | 2 | 1 | 1 | 2 | 5 |
| 91  | 6 | 5 | 2 | 2 | 1 | 2 | 2 | 5 |
| 92  | 5 | 6 | 5 | 5 | 4 | 3 | 3 | 6 |
| 93  | 5 | 5 | 2 | 2 | 2 | 2 | 2 | 5 |
| 94  | 6 | 6 | 1 | 1 | 1 | 2 | 1 | 3 |
| 95  | 6 | 5 | 2 | 2 | 1 | 1 | 2 | 3 |
| 96  | 6 | 6 | 5 | 3 | 2 | 3 | 5 | 5 |
| 97  | 6 | 6 | 6 | 5 | 2 | 3 | 6 | 6 |
| 98  | 6 | 6 | 6 | 3 | 1 | 2 | 5 | 5 |
| 99  | 6 | 5 | 2 | 2 | 1 | 2 | 2 | 2 |
| 100 | 6 | 3 | 1 | 2 | 1 | 2 | 2 | 3 |
| 101 | 6 | 5 | 2 | 2 | 1 | 2 | 3 | 2 |
| 102 | 6 | 5 | 2 | 2 | 1 | 2 | 3 | 3 |
| 103 | 7 | 6 | 3 | 3 | 2 | 3 | 6 | 6 |
| 104 | 6 | 5 | 2 | 2 | 1 | 3 | 6 | 5 |
| 105 | 6 | 5 | 2 | 2 | 1 | 2 | 5 | 5 |
| 106 | 6 | 5 | 2 | 2 | 1 | 2 | 3 | 2 |
| 107 | 6 | 5 | 2 | 2 | 1 | 2 | 3 | 2 |
| 108 | 6 | 5 | 2 | 2 | 2 | 3 | 3 | 2 |
| 109 | 7 | 6 | 2 | 2 | 2 | 3 | 6 | 5 |
| 110 | 6 | 5 | 2 | 2 | 2 | 3 | 6 | 5 |
| 111 | 6 | 2 | 1 | 1 | 1 | 2 | 2 | 2 |
| 112 | 6 | 5 | 2 | 2 | 1 | 2 | 2 | 3 |
| 113 | 2 | 2 | 1 | 1 | 2 | 3 | 6 | 5 |
| 114 | 7 | 6 | 2 | 2 | 2 | 3 | 6 | 6 |
| 115 | 6 | 5 | 2 | 2 | 1 | 2 | 5 | 5 |
| 116 | 6 | 5 | 2 | 2 | 2 | 2 | 3 | 3 |
| 117 | 6 | 5 | 2 | 2 | 1 | 1 | 5 | 2 |
| 118 | 5 | 2 | 2 | 2 | 1 | 2 | 2 | 2 |
| 119 | 6 | 6 | 2 | 1 | 1 | 2 | 5 | 5 |
| 120 | 5 | 5 | 2 | 2 | 1 | 2 | 3 | 2 |
| 121 | 6 | 5 | 2 | 2 | 1 | 2 | 2 | 2 |
| 122 | 6 | 6 | 2 | 2 | 1 | 2 | 5 | 5 |
| 123 | 6 | 5 | 3 | 2 | 1 | 2 | 6 | 6 |
| 124 | 6 | 5 | 2 | 2 | 2 | 2 | 5 | 5 |
| 125 | 6 | 3 | 2 | 2 | 1 | 2 | 5 | 5 |
| 126 | 5 | 3 | 2 | 2 | 1 | 2 | 2 | 2 |
| 127 | 6 | 5 | 2 | 2 | 2 | 3 | 5 | 5 |
| 128 | 5 | 5 | 3 | 2 | 1 | 3 | 3 | 2 |
| 129 | 6 | 5 | 1 | 2 | 1 | 2 | 3 | 3 |
| 130 | 6 | 5 | 1 | 2 | 1 | 3 | 3 | 3 |
| 131 | 6 | 5 | 1 | 1 | 1 | 2 | 3 | 2 |
| 132 | 6 | 5 | 1 | 2 | 1 | 2 | 2 | 2 |
| 133 | 2 | 2 | 1 | 1 | 1 | 1 | 1 | 2 |
| 134 | 6 | 6 | 2 | 1 | 1 | 3 | 6 | 5 |

Supplementary S3: Likert dataTable

|     |   |   |   |   |   |   |   |   |
|-----|---|---|---|---|---|---|---|---|
| 135 | 6 | 6 | 2 | 2 | 2 | 2 | 2 | 2 |
| 136 | 6 | 5 | 2 | 2 | 1 | 2 | 3 | 2 |
| 137 | 6 | 3 | 2 | 2 | 1 | 2 | 2 | 2 |
| 138 | 5 | 3 | 2 | 2 | 1 | 2 | 2 | 2 |
| 139 | 6 | 6 | 2 | 2 | 1 | 2 | 5 | 5 |
| 140 | 6 | 3 | 2 | 2 | 1 | 2 | 2 | 2 |
| 141 | 6 | 6 | 1 | 1 | 1 | 2 | 5 | 5 |
| 142 | 5 | 3 | 2 | 2 | 1 | 2 | 2 | 2 |
| 143 | 3 | 1 | 7 | 6 | 3 | 5 | 7 | 7 |
| 144 | 6 | 5 | 2 | 2 | 1 | 3 | 5 | 5 |
| 145 | 6 | 5 | 2 | 2 | 1 | 3 | 5 | 6 |
| 146 | 6 | 5 | 2 | 2 | 1 | 3 | 5 | 5 |
| 147 | 5 | 5 | 2 | 2 | 1 | 3 | 5 | 5 |
| 148 | 6 | 3 | 2 | 2 | 1 | 2 | 6 | 6 |
| 149 | 7 | 7 | 3 | 2 | 1 | 2 | 5 | 4 |
| 150 | 6 | 5 | 5 | 5 | 4 | 4 | 4 | 4 |
| 151 | 6 | 3 | 2 | 1 | 1 | 2 | 2 | 3 |
| 152 | 6 | 4 | 3 | 3 | 1 | 3 | 3 | 3 |
| 153 | 7 | 7 | 3 | 2 | 1 | 1 | 4 | 3 |
| 154 | 7 | 5 | 5 | 7 | 3 | 4 | 5 | 4 |
| 155 | 7 | 6 | 5 | 6 | 1 | 1 | 3 | 5 |
| 156 | 7 | 5 | 1 | 1 | 1 | 1 | 3 | 1 |
| 157 | 7 | 6 | 2 | 1 | 1 | 2 | 2 | 1 |
| 158 | 6 | 3 | 2 | 1 | 1 | 1 | 1 | 1 |
| 159 | 7 | 6 | 1 | 1 | 1 | 1 | 3 | 3 |
| 160 | 6 | 5 | 1 | 1 | 1 | 1 | 2 | 2 |
| 161 | 7 | 6 | 2 | 2 | 1 | 1 | 2 | 3 |
| 162 | 6 | 1 | 1 | 1 | 1 | 1 | 3 | 2 |
| 163 | 6 | 6 | 1 | 1 | 1 | 1 | 2 | 2 |
| 164 | 6 | 5 | 3 | 2 | 1 | 1 | 2 | 5 |
| 165 | 6 | 5 | 2 | 2 | 1 | 2 | 2 | 5 |
| 166 | 5 | 6 | 5 | 5 | 4 | 3 | 3 | 6 |
| 167 | 5 | 5 | 2 | 2 | 2 | 2 | 2 | 5 |
| 168 | 6 | 6 | 1 | 1 | 1 | 2 | 1 | 3 |
| 169 | 6 | 5 | 2 | 2 | 1 | 1 | 2 | 3 |
| 170 | 6 | 6 | 5 | 3 | 2 | 3 | 5 | 5 |
| 171 | 6 | 6 | 6 | 5 | 2 | 3 | 6 | 6 |
| 172 | 6 | 6 | 6 | 3 | 1 | 2 | 5 | 5 |
| 173 | 6 | 5 | 2 | 2 | 1 | 2 | 2 | 2 |
| 174 | 6 | 3 | 1 | 2 | 1 | 2 | 2 | 3 |
| 175 | 6 | 5 | 2 | 2 | 1 | 2 | 3 | 2 |
| 176 | 6 | 5 | 2 | 2 | 1 | 2 | 3 | 3 |
| 177 | 7 | 6 | 3 | 3 | 2 | 3 | 6 | 6 |
| 178 | 6 | 5 | 2 | 2 | 1 | 3 | 6 | 5 |
| 179 | 6 | 5 | 2 | 2 | 1 | 2 | 5 | 5 |
| 180 | 6 | 5 | 2 | 2 | 1 | 2 | 3 | 2 |
| 181 | 6 | 5 | 2 | 2 | 1 | 2 | 3 | 2 |
| 182 | 6 | 5 | 2 | 2 | 2 | 3 | 3 | 2 |

Supplementary S3: Likert dataTable

| 183 | 7      | 6      | 2      | 2      | 2      | 3      | 6       | 5      |
|-----|--------|--------|--------|--------|--------|--------|---------|--------|
| 184 | 6      | 5      | 2      | 2      | 2      | 3      | 6       | 5      |
| 185 | 6      | 2      | 1      | 1      | 1      | 2      | 2       | 2      |
| 186 | 6      | 5      | 2      | 2      | 1      | 2      | 2       | 3      |
| 187 | 2      | 2      | 1      | 1      | 2      | 3      | 6       | 5      |
| 188 | 7      | 6      | 2      | 2      | 2      | 3      | 6       | 6      |
| 189 | 6      | 5      | 2      | 2      | 1      | 2      | 5       | 5      |
| 190 | 6      | 5      | 2      | 2      | 2      | 2      | 3       | 3      |
| 191 | 6      | 5      | 2      | 2      | 1      | 1      | 5       | 2      |
| 192 | 5      | 2      | 2      | 2      | 1      | 2      | 2       | 2      |
| 193 | 6      | 6      | 2      | 1      | 1      | 2      | 5       | 5      |
| 194 | 5      | 5      | 2      | 2      | 1      | 2      | 3       | 2      |
| 195 | 6      | 5      | 2      | 2      | 1      | 2      | 2       | 2      |
| 196 | 6      | 6      | 2      | 2      | 1      | 2      | 5       | 5      |
| 197 | 6      | 5      | 3      | 2      | 1      | 2      | 6       | 6      |
| 198 | 6      | 5      | 2      | 2      | 2      | 2      | 5       | 5      |
| 199 | 6      | 3      | 2      | 2      | 1      | 2      | 5       | 5      |
| 200 | 5      | 3      | 2      | 2      | 1      | 2      | 2       | 2      |
| 201 | 6      | 5      | 2      | 2      | 2      | 3      | 5       | 5      |
| 202 | 5      | 5      | 3      | 2      | 1      | 3      | 3       | 2      |
| 203 | 6      | 5      | 1      | 2      | 1      | 2      | 3       | 3      |
| 204 | 6      | 5      | 1      | 2      | 1      | 3      | 3       | 3      |
| 205 | 6      | 5      | 1      | 1      | 1      | 2      | 3       | 2      |
| 206 | 6      | 5      | 1      | 2      | 1      | 2      | 2       | 2      |
| 207 | 2      | 2      | 1      | 1      | 1      | 1      | 1       | 2      |
| 208 | 6      | 6      | 2      | 1      | 1      | 3      | 6       | 5      |
| 209 | 6      | 6      | 2      | 2      | 2      | 2      | 2       | 2      |
| 210 | 6      | 5      | 2      | 2      | 1      | 2      | 3       | 2      |
| 211 | 6      | 3      | 2      | 2      | 1      | 2      | 2       | 2      |
| 212 | 5      | 3      | 2      | 2      | 1      | 2      | 2       | 2      |
| 213 | 6      | 6      | 2      | 2      | 1      | 2      | 5       | 5      |
| 214 | 6      | 3      | 2      | 2      | 1      | 2      | 2       | 2      |
| 215 | 6      | 6      | 1      | 1      | 1      | 2      | 5       | 5      |
| 216 | 5      | 3      | 2      | 2      | 1      | 2      | 2       | 2      |
| No. | X(6)Q4 | X(6)Q5 | X(6)Q6 | X(6)Q7 | X(6)Q8 | X(6)Q9 | X(6)Q10 | X(7)Q1 |
| 1   | 7      | 7      | 7      | 6      | 5      | 5      | 1       | 5      |
| 2   | 4      | 6      | 6      | 6      | 4      | 5      | 4       | 5      |
| 3   | 5      | 6      | 5      | 6      | 4      | 5      | 1       | 2      |
| 4   | 4      | 5      | 5      | 5      | 5      | 5      | 2       | 5      |
| 5   | 7      | 7      | 7      | 7      | 7      | 7      | 4       | 7      |
| 6   | 7      | 5      | 7      | 7      | 5      | 5      | 3       | 6      |
| 7   | 6      | 6      | 5      | 7      | 7      | 7      | 1       | 4      |
| 8   | 6      | 7      | 6      | 6      | 7      | 6      | 1       | 5      |
| 9   | 6      | 6      | 5      | 5      | 6      | 3      | 1       | 2      |
| 10  | 5      | 5      | 5      | 5      | 3      | 4      | 1       | 2      |

# Supplementary S3: Likert dataTable

|    |   |   |   |   |   |   |   |   |
|----|---|---|---|---|---|---|---|---|
| 11 | 6 | 6 | 6 | 6 | 6 | 3 | 1 | 6 |
| 12 | 6 | 6 | 5 | 5 | 6 | 3 | 1 | 2 |
| 13 | 6 | 6 | 5 | 5 | 7 | 6 | 1 | 4 |
| 14 | 6 | 6 | 6 | 3 | 6 | 2 | 1 | 5 |
| 15 | 6 | 7 | 5 | 5 | 7 | 2 | 1 | 5 |
| 16 | 6 | 6 | 6 | 5 | 5 | 5 | 1 | 4 |
| 17 | 6 | 6 | 3 | 3 | 6 | 2 | 1 | 5 |
| 18 | 6 | 7 | 7 | 7 | 4 | 7 | 5 | 7 |
| 19 | 5 | 5 | 2 | 2 | 5 | 2 | 1 | 5 |
| 20 | 5 | 6 | 6 | 5 | 6 | 2 | 1 | 5 |
| 21 | 6 | 5 | 3 | 3 | 6 | 2 | 1 | 5 |
| 22 | 7 | 7 | 6 | 6 | 7 | 3 | 2 | 5 |
| 23 | 6 | 6 | 6 | 5 | 7 | 6 | 3 | 5 |
| 24 | 6 | 6 | 6 | 6 | 6 | 5 | 2 | 5 |
| 25 | 5 | 6 | 5 | 5 | 6 | 2 | 1 | 5 |
| 26 | 5 | 6 | 6 | 5 | 5 | 2 | 1 | 5 |
| 27 | 6 | 6 | 6 | 3 | 6 | 2 | 1 | 5 |
| 28 | 6 | 6 | 6 | 3 | 6 | 2 | 1 | 5 |
| 29 | 6 | 6 | 6 | 5 | 6 | 6 | 2 | 6 |
| 30 | 6 | 6 | 6 | 5 | 6 | 3 | 1 | 6 |
| 31 | 6 | 6 | 6 | 5 | 6 | 6 | 2 | 6 |
| 32 | 6 | 6 | 6 | 3 | 5 | 2 | 1 | 5 |
| 33 | 6 | 7 | 6 | 5 | 6 | 3 | 2 | 5 |
| 34 | 5 | 6 | 5 | 5 | 5 | 2 | 2 | 6 |
| 35 | 6 | 6 | 6 | 5 | 6 | 5 | 2 | 6 |
| 36 | 6 | 6 | 6 | 6 | 6 | 3 | 2 | 6 |
| 37 | 6 | 6 | 6 | 6 | 5 | 2 | 1 | 4 |
| 38 | 7 | 7 | 6 | 6 | 5 | 2 | 2 | 5 |
| 39 | 5 | 3 | 5 | 3 | 5 | 6 | 2 | 3 |
| 40 | 6 | 6 | 6 | 6 | 6 | 5 | 2 | 6 |
| 41 | 6 | 6 | 6 | 5 | 5 | 5 | 2 | 5 |
| 42 | 6 | 6 | 5 | 5 | 5 | 5 | 1 | 5 |
| 43 | 7 | 7 | 5 | 5 | 6 | 3 | 1 | 5 |
| 44 | 5 | 5 | 5 | 5 | 5 | 2 | 2 | 4 |
| 45 | 7 | 7 | 6 | 5 | 6 | 5 | 1 | 6 |
| 46 | 6 | 6 | 5 | 5 | 5 | 2 | 1 | 5 |
| 47 | 6 | 6 | 5 | 3 | 5 | 5 | 2 | 5 |
| 48 | 6 | 6 | 6 | 6 | 6 | 5 | 2 | 6 |
| 49 | 7 | 6 | 6 | 6 | 6 | 6 | 1 | 6 |
| 50 | 6 | 6 | 6 | 3 | 5 | 5 | 2 | 5 |
| 51 | 6 | 6 | 6 | 6 | 6 | 6 | 1 | 5 |
| 52 | 5 | 6 | 6 | 6 | 5 | 2 | 1 | 4 |
| 53 | 6 | 6 | 6 | 5 | 5 | 5 | 2 | 6 |
| 54 | 6 | 6 | 5 | 5 | 3 | 5 | 3 | 5 |
| 55 | 6 | 6 | 6 | 5 | 4 | 3 | 2 | 5 |
| 56 | 5 | 6 | 5 | 5 | 5 | 3 | 1 | 5 |
| 57 | 5 | 6 | 6 | 5 | 5 | 2 | 1 | 5 |
| 58 | 6 | 6 | 6 | 5 | 6 | 2 | 1 | 6 |

Supplementary S3: Likert dataTable

|     |   |   |   |   |   |   |   |   |
|-----|---|---|---|---|---|---|---|---|
| 59  | 5 | 5 | 5 | 5 | 1 | 1 | 1 | 2 |
| 60  | 6 | 6 | 6 | 6 | 5 | 5 | 2 | 6 |
| 61  | 6 | 6 | 6 | 5 | 6 | 2 | 2 | 5 |
| 62  | 6 | 7 | 7 | 5 | 6 | 3 | 1 | 5 |
| 63  | 6 | 5 | 5 | 5 | 3 | 2 | 2 | 2 |
| 64  | 6 | 6 | 5 | 5 | 5 | 2 | 2 | 3 |
| 65  | 6 | 7 | 6 | 3 | 6 | 5 | 1 | 5 |
| 66  | 5 | 6 | 5 | 5 | 3 | 2 | 1 | 5 |
| 67  | 6 | 6 | 6 | 2 | 6 | 5 | 2 | 6 |
| 68  | 5 | 5 | 5 | 3 | 5 | 2 | 1 | 5 |
| 69  | 7 | 3 | 3 | 3 | 2 | 6 | 2 | 7 |
| 70  | 7 | 6 | 6 | 6 | 5 | 6 | 1 | 5 |
| 71  | 7 | 6 | 6 | 6 | 5 | 6 | 2 | 5 |
| 72  | 6 | 7 | 6 | 6 | 5 | 6 | 1 | 5 |
| 73  | 7 | 7 | 5 | 2 | 6 | 5 | 2 | 3 |
| 74  | 6 | 6 | 6 | 2 | 5 | 5 | 2 | 3 |
| 75  | 7 | 7 | 7 | 6 | 5 | 5 | 1 | 5 |
| 76  | 4 | 6 | 6 | 6 | 4 | 5 | 4 | 5 |
| 77  | 5 | 6 | 5 | 6 | 4 | 5 | 1 | 2 |
| 78  | 4 | 5 | 5 | 5 | 5 | 5 | 2 | 5 |
| 79  | 7 | 7 | 7 | 7 | 7 | 7 | 4 | 7 |
| 80  | 7 | 5 | 7 | 7 | 5 | 5 | 3 | 6 |
| 81  | 6 | 6 | 5 | 7 | 7 | 7 | 1 | 4 |
| 82  | 6 | 7 | 6 | 6 | 7 | 6 | 1 | 5 |
| 83  | 6 | 6 | 5 | 5 | 6 | 3 | 1 | 2 |
| 84  | 5 | 5 | 5 | 5 | 3 | 4 | 1 | 2 |
| 85  | 6 | 6 | 6 | 6 | 6 | 3 | 1 | 6 |
| 86  | 6 | 6 | 5 | 5 | 6 | 3 | 1 | 2 |
| 87  | 6 | 6 | 5 | 5 | 7 | 6 | 1 | 4 |
| 88  | 6 | 6 | 6 | 3 | 6 | 2 | 1 | 5 |
| 89  | 6 | 7 | 5 | 5 | 7 | 2 | 1 | 5 |
| 90  | 6 | 6 | 6 | 5 | 5 | 5 | 1 | 4 |
| 91  | 6 | 6 | 3 | 3 | 6 | 2 | 1 | 5 |
| 92  | 6 | 7 | 7 | 7 | 4 | 7 | 5 | 7 |
| 93  | 5 | 5 | 2 | 2 | 5 | 2 | 1 | 5 |
| 94  | 5 | 6 | 6 | 5 | 6 | 2 | 1 | 5 |
| 95  | 6 | 5 | 3 | 3 | 6 | 2 | 1 | 5 |
| 96  | 7 | 7 | 6 | 6 | 7 | 3 | 2 | 5 |
| 97  | 6 | 6 | 6 | 5 | 7 | 6 | 3 | 5 |
| 98  | 6 | 6 | 6 | 6 | 6 | 5 | 2 | 5 |
| 99  | 5 | 6 | 5 | 5 | 6 | 2 | 1 | 5 |
| 100 | 5 | 6 | 6 | 5 | 5 | 2 | 1 | 5 |
| 101 | 6 | 6 | 6 | 3 | 6 | 2 | 1 | 5 |
| 102 | 6 | 6 | 6 | 3 | 6 | 2 | 1 | 5 |
| 103 | 6 | 6 | 6 | 5 | 6 | 6 | 2 | 6 |
| 104 | 6 | 6 | 6 | 5 | 6 | 3 | 1 | 6 |
| 105 | 6 | 6 | 6 | 5 | 6 | 6 | 2 | 6 |
| 106 | 6 | 6 | 6 | 3 | 5 | 2 | 1 | 5 |

Supplementary S3: Likert dataTable

|     |   |   |   |   |   |   |   |   |
|-----|---|---|---|---|---|---|---|---|
| 107 | 6 | 7 | 6 | 5 | 6 | 3 | 2 | 5 |
| 108 | 5 | 6 | 5 | 5 | 5 | 2 | 2 | 6 |
| 109 | 6 | 6 | 6 | 5 | 6 | 5 | 2 | 6 |
| 110 | 6 | 6 | 6 | 6 | 6 | 3 | 2 | 6 |
| 111 | 6 | 6 | 6 | 6 | 5 | 2 | 1 | 4 |
| 112 | 7 | 7 | 6 | 6 | 5 | 2 | 2 | 5 |
| 113 | 5 | 3 | 5 | 3 | 5 | 6 | 2 | 3 |
| 114 | 6 | 6 | 6 | 6 | 6 | 5 | 2 | 6 |
| 115 | 6 | 6 | 6 | 5 | 5 | 5 | 2 | 5 |
| 116 | 6 | 6 | 5 | 5 | 5 | 5 | 1 | 5 |
| 117 | 7 | 7 | 5 | 5 | 6 | 3 | 1 | 5 |
| 118 | 5 | 5 | 5 | 5 | 5 | 2 | 2 | 4 |
| 119 | 7 | 7 | 6 | 5 | 6 | 5 | 1 | 6 |
| 120 | 6 | 6 | 5 | 5 | 5 | 2 | 1 | 5 |
| 121 | 6 | 6 | 5 | 3 | 5 | 5 | 2 | 5 |
| 122 | 6 | 6 | 6 | 6 | 6 | 5 | 2 | 6 |
| 123 | 7 | 6 | 6 | 6 | 6 | 6 | 1 | 6 |
| 124 | 6 | 6 | 6 | 3 | 5 | 5 | 2 | 5 |
| 125 | 6 | 6 | 6 | 6 | 6 | 6 | 1 | 5 |
| 126 | 5 | 6 | 6 | 6 | 5 | 2 | 1 | 4 |
| 127 | 6 | 6 | 6 | 5 | 5 | 5 | 2 | 6 |
| 128 | 6 | 6 | 5 | 5 | 3 | 5 | 3 | 5 |
| 129 | 6 | 6 | 6 | 5 | 4 | 3 | 2 | 5 |
| 130 | 5 | 6 | 5 | 5 | 5 | 3 | 1 | 5 |
| 131 | 5 | 6 | 6 | 5 | 5 | 2 | 1 | 5 |
| 132 | 6 | 6 | 6 | 5 | 6 | 2 | 1 | 6 |
| 133 | 5 | 5 | 5 | 5 | 1 | 1 | 1 | 2 |
| 134 | 6 | 6 | 6 | 6 | 5 | 5 | 2 | 6 |
| 135 | 6 | 6 | 6 | 5 | 6 | 2 | 2 | 5 |
| 136 | 6 | 7 | 7 | 5 | 6 | 3 | 1 | 5 |
| 137 | 6 | 5 | 5 | 5 | 3 | 2 | 2 | 2 |
| 138 | 6 | 6 | 5 | 5 | 5 | 2 | 2 | 3 |
| 139 | 6 | 7 | 6 | 3 | 6 | 5 | 1 | 5 |
| 140 | 5 | 6 | 5 | 5 | 3 | 2 | 1 | 5 |
| 141 | 6 | 6 | 6 | 2 | 6 | 5 | 2 | 6 |
| 142 | 5 | 5 | 5 | 3 | 5 | 2 | 1 | 5 |
| 143 | 7 | 3 | 3 | 3 | 2 | 6 | 2 | 7 |
| 144 | 7 | 6 | 6 | 6 | 5 | 6 | 1 | 5 |
| 145 | 7 | 6 | 6 | 6 | 5 | 6 | 2 | 5 |
| 146 | 6 | 7 | 6 | 6 | 5 | 6 | 1 | 5 |
| 147 | 7 | 7 | 5 | 2 | 6 | 5 | 2 | 3 |
| 148 | 6 | 6 | 6 | 2 | 5 | 5 | 2 | 3 |
| 149 | 7 | 7 | 7 | 6 | 5 | 5 | 1 | 5 |
| 150 | 4 | 6 | 6 | 6 | 4 | 5 | 4 | 5 |
| 151 | 5 | 6 | 5 | 6 | 4 | 5 | 1 | 2 |
| 152 | 4 | 5 | 5 | 5 | 5 | 5 | 2 | 5 |
| 153 | 7 | 7 | 7 | 7 | 7 | 7 | 4 | 7 |
| 154 | 7 | 5 | 7 | 7 | 5 | 5 | 3 | 6 |

Supplementary S3: Likert dataTable

|     |   |   |   |   |   |   |   |   |
|-----|---|---|---|---|---|---|---|---|
| 155 | 6 | 6 | 5 | 7 | 7 | 7 | 1 | 4 |
| 156 | 6 | 7 | 6 | 6 | 7 | 6 | 1 | 5 |
| 157 | 6 | 6 | 5 | 5 | 6 | 3 | 1 | 2 |
| 158 | 5 | 5 | 5 | 5 | 3 | 4 | 1 | 2 |
| 159 | 6 | 6 | 6 | 6 | 6 | 3 | 1 | 6 |
| 160 | 6 | 6 | 5 | 5 | 6 | 3 | 1 | 2 |
| 161 | 6 | 6 | 5 | 5 | 7 | 6 | 1 | 4 |
| 162 | 6 | 6 | 6 | 3 | 6 | 2 | 1 | 5 |
| 163 | 6 | 7 | 5 | 5 | 7 | 2 | 1 | 5 |
| 164 | 6 | 6 | 6 | 5 | 5 | 5 | 1 | 4 |
| 165 | 6 | 6 | 3 | 3 | 6 | 2 | 1 | 5 |
| 166 | 6 | 7 | 7 | 7 | 4 | 7 | 5 | 7 |
| 167 | 5 | 5 | 2 | 2 | 5 | 2 | 1 | 5 |
| 168 | 5 | 6 | 6 | 5 | 6 | 2 | 1 | 5 |
| 169 | 6 | 5 | 3 | 3 | 6 | 2 | 1 | 5 |
| 170 | 7 | 7 | 6 | 6 | 7 | 3 | 2 | 5 |
| 171 | 6 | 6 | 6 | 5 | 7 | 6 | 3 | 5 |
| 172 | 6 | 6 | 6 | 6 | 6 | 5 | 2 | 5 |
| 173 | 5 | 6 | 5 | 5 | 6 | 2 | 1 | 5 |
| 174 | 5 | 6 | 6 | 5 | 5 | 2 | 1 | 5 |
| 175 | 6 | 6 | 6 | 3 | 6 | 2 | 1 | 5 |
| 176 | 6 | 6 | 6 | 3 | 6 | 2 | 1 | 5 |
| 177 | 6 | 6 | 6 | 5 | 6 | 6 | 2 | 6 |
| 178 | 6 | 6 | 6 | 5 | 6 | 3 | 1 | 6 |
| 179 | 6 | 6 | 6 | 5 | 6 | 6 | 2 | 6 |
| 180 | 6 | 6 | 6 | 3 | 5 | 2 | 1 | 5 |
| 181 | 6 | 7 | 6 | 5 | 6 | 3 | 2 | 5 |
| 182 | 5 | 6 | 5 | 5 | 5 | 2 | 2 | 6 |
| 183 | 6 | 6 | 6 | 5 | 6 | 5 | 2 | 6 |
| 184 | 6 | 6 | 6 | 6 | 6 | 3 | 2 | 6 |
| 185 | 6 | 6 | 6 | 6 | 5 | 2 | 1 | 4 |
| 186 | 7 | 7 | 6 | 6 | 5 | 2 | 2 | 5 |
| 187 | 5 | 3 | 5 | 3 | 5 | 6 | 2 | 3 |
| 188 | 6 | 6 | 6 | 6 | 6 | 5 | 2 | 6 |
| 189 | 6 | 6 | 6 | 5 | 5 | 5 | 2 | 5 |
| 190 | 6 | 6 | 5 | 5 | 5 | 5 | 1 | 5 |
| 191 | 7 | 7 | 5 | 5 | 6 | 3 | 1 | 5 |
| 192 | 5 | 5 | 5 | 5 | 5 | 2 | 2 | 4 |
| 193 | 7 | 7 | 6 | 5 | 6 | 5 | 1 | 6 |
| 194 | 6 | 6 | 5 | 5 | 5 | 2 | 1 | 5 |
| 195 | 6 | 6 | 5 | 3 | 5 | 5 | 2 | 5 |
| 196 | 6 | 6 | 6 | 6 | 6 | 5 | 2 | 6 |
| 197 | 7 | 6 | 6 | 6 | 6 | 6 | 1 | 6 |
| 198 | 6 | 6 | 6 | 3 | 5 | 5 | 2 | 5 |
| 199 | 6 | 6 | 6 | 6 | 6 | 6 | 1 | 5 |
| 200 | 5 | 6 | 6 | 6 | 5 | 2 | 1 | 4 |
| 201 | 6 | 6 | 6 | 5 | 5 | 5 | 2 | 6 |
| 202 | 6 | 6 | 5 | 5 | 3 | 5 | 3 | 5 |



Supplementary S3: Likert dataTable

|     |   |   |   |   |   |   |   |   |
|-----|---|---|---|---|---|---|---|---|
| 203 | 6 | 6 | 6 | 5 | 4 | 3 | 2 | 5 |
| 204 | 5 | 6 | 5 | 5 | 5 | 3 | 1 | 5 |
| 205 | 5 | 6 | 6 | 5 | 5 | 2 | 1 | 5 |
| 206 | 6 | 6 | 6 | 5 | 6 | 2 | 1 | 6 |
| 207 | 5 | 5 | 5 | 5 | 1 | 1 | 1 | 2 |
| 208 | 6 | 6 | 6 | 6 | 5 | 5 | 2 | 6 |
| 209 | 6 | 6 | 6 | 5 | 6 | 2 | 2 | 5 |
| 210 | 6 | 7 | 7 | 5 | 6 | 3 | 1 | 5 |
| 211 | 6 | 5 | 5 | 5 | 3 | 2 | 2 | 2 |
| 212 | 6 | 6 | 5 | 5 | 5 | 2 | 2 | 3 |
| 213 | 6 | 7 | 6 | 3 | 6 | 5 | 1 | 5 |
| 214 | 5 | 6 | 5 | 5 | 3 | 2 | 1 | 5 |
| 215 | 6 | 6 | 6 | 2 | 6 | 5 | 2 | 6 |
| 216 | 5 | 5 | 5 | 3 | 5 | 2 | 1 | 5 |

| No. | X(7)Q2 | X(7)Q3 | X(7)Q4 | X(7)Q5 | X(8)Q1 | X(8)Q2 | X(8)Q3 | X(8)Q4 |
|-----|--------|--------|--------|--------|--------|--------|--------|--------|
| 1   | 5      | 2      | 3      | 3      | 5      | 1      | 2      | 1      |
| 2   | 4      | 4      | 4      | 4      | 4      | 5      | 5      | 4      |
| 3   | 2      | 1      | 1      | 1      | 4      | 2      | 2      | 2      |
| 4   | 3      | 3      | 2      | 2      | 4      | 3      | 2      | 3      |
| 5   | 7      | 5      | 6      | 5      | 7      | 4      | 2      | 5      |
| 6   | 4      | 3      | 1      | 1      | 7      | 4      | 3      | 4      |
| 7   | 2      | 3      | 2      | 3      | 7      | 3      | 3      | 2      |
| 8   | 2      | 1      | 1      | 1      | 5      | 1      | 1      | 5      |
| 9   | 2      | 1      | 1      | 1      | 3      | 1      | 2      | 3      |
| 10  | 1      | 1      | 1      | 1      | 2      | 1      | 1      | 2      |
| 11  | 2      | 1      | 1      | 1      | 3      | 1      | 2      | 1      |
| 12  | 2      | 2      | 1      | 1      | 3      | 1      | 2      | 2      |
| 13  | 2      | 3      | 3      | 2      | 7      | 3      | 3      | 2      |
| 14  | 2      | 1      | 1      | 1      | 5      | 2      | 2      | 2      |
| 15  | 2      | 1      | 2      | 1      | 5      | 1      | 2      | 2      |
| 16  | 2      | 2      | 1      | 2      | 2      | 2      | 3      | 4      |
| 17  | 2      | 1      | 1      | 1      | 2      | 1      | 3      | 3      |
| 18  | 5      | 1      | 1      | 1      | 7      | 6      | 6      | 1      |
| 19  | 2      | 2      | 2      | 2      | 2      | 1      | 2      | 2      |
| 20  | 2      | 1      | 1      | 1      | 3      | 1      | 3      | 5      |
| 21  | 2      | 2      | 2      | 2      | 3      | 1      | 2      | 2      |
| 22  | 3      | 2      | 2      | 3      | 6      | 3      | 5      | 3      |
| 23  | 2      | 2      | 2      | 2      | 5      | 2      | 5      | 3      |
| 24  | 2      | 2      | 2      | 2      | 5      | 3      | 3      | 3      |
| 25  | 2      | 2      | 2      | 1      | 5      | 2      | 3      | 3      |
| 26  | 2      | 2      | 2      | 2      | 5      | 2      | 3      | 5      |
| 27  | 2      | 2      | 2      | 2      | 5      | 2      | 2      | 3      |
| 28  | 3      | 2      | 2      | 2      | 6      | 3      | 3      | 3      |
| 29  | 2      | 2      | 2      | 2      | 7      | 3      | 5      | 3      |
| 30  | 2      | 2      | 2      | 3      | 6      | 3      | 3      | 3      |
| 31  | 3      | 2      | 2      | 2      | 6      | 1      | 3      | 2      |

Supplementary S3: Likert dataTable

|    |   |   |   |   |   |   |   |   |
|----|---|---|---|---|---|---|---|---|
| 32 | 2 | 2 | 2 | 2 | 3 | 2 | 2 | 3 |
| 33 | 2 | 2 | 1 | 1 | 5 | 1 | 3 | 3 |
| 34 | 3 | 2 | 1 | 1 | 5 | 2 | 2 | 3 |
| 35 | 3 | 3 | 2 | 3 | 6 | 1 | 3 | 5 |
| 36 | 3 | 2 | 1 | 1 | 6 | 2 | 2 | 3 |
| 37 | 4 | 4 | 4 | 4 | 2 | 1 | 1 | 2 |
| 38 | 2 | 1 | 1 | 1 | 5 | 1 | 1 | 2 |
| 39 | 1 | 6 | 6 | 6 | 7 | 3 | 3 | 6 |
| 40 | 2 | 2 | 2 | 2 | 6 | 2 | 5 | 3 |
| 41 | 1 | 1 | 3 | 3 | 6 | 2 | 3 | 5 |
| 42 | 2 | 2 | 3 | 3 | 6 | 1 | 2 | 3 |
| 43 | 1 | 5 | 2 | 3 | 5 | 1 | 2 | 3 |
| 44 | 4 | 2 | 2 | 2 | 3 | 2 | 2 | 2 |
| 45 | 3 | 2 | 2 | 5 | 5 | 2 | 2 | 3 |
| 46 | 2 | 2 | 2 | 2 | 5 | 2 | 2 | 2 |
| 47 | 2 | 2 | 1 | 1 | 6 | 2 | 2 | 3 |
| 48 | 3 | 5 | 5 | 2 | 6 | 2 | 5 | 5 |
| 49 | 2 | 2 | 2 | 2 | 6 | 2 | 5 | 5 |
| 50 | 2 | 2 | 2 | 2 | 5 | 2 | 2 | 5 |
| 51 | 1 | 1 | 1 | 1 | 5 | 1 | 3 | 5 |
| 52 | 4 | 4 | 4 | 4 | 3 | 2 | 2 | 4 |
| 53 | 2 | 2 | 2 | 5 | 6 | 2 | 3 | 5 |
| 54 | 3 | 2 | 1 | 5 | 5 | 1 | 2 | 3 |
| 55 | 2 | 2 | 2 | 2 | 6 | 1 | 3 | 5 |
| 56 | 2 | 2 | 2 | 2 | 5 | 2 | 2 | 3 |
| 57 | 1 | 1 | 1 | 1 | 6 | 1 | 2 | 3 |
| 58 | 2 | 2 | 2 | 3 | 6 | 1 | 2 | 2 |
| 59 | 2 | 2 | 2 | 2 | 2 | 1 | 1 | 2 |
| 60 | 3 | 3 | 2 | 2 | 5 | 2 | 2 | 5 |
| 61 | 3 | 2 | 1 | 3 | 5 | 1 | 1 | 2 |
| 62 | 1 | 1 | 1 | 1 | 5 | 1 | 2 | 5 |
| 63 | 2 | 2 | 2 | 2 | 3 | 2 | 2 | 4 |
| 64 | 2 | 1 | 1 | 1 | 3 | 1 | 1 | 3 |
| 65 | 2 | 2 | 1 | 5 | 5 | 1 | 2 | 3 |
| 66 | 2 | 2 | 2 | 2 | 2 | 2 | 2 | 5 |
| 67 | 3 | 2 | 2 | 2 | 5 | 1 | 2 | 5 |
| 68 | 2 | 2 | 2 | 5 | 2 | 1 | 1 | 5 |
| 69 | 6 | 7 | 7 | 7 | 1 | 2 | 1 | 7 |
| 70 | 2 | 3 | 2 | 3 | 6 | 2 | 6 | 3 |
| 71 | 2 | 3 | 2 | 3 | 6 | 1 | 5 | 3 |
| 72 | 2 | 5 | 2 | 3 | 6 | 2 | 5 | 3 |
| 73 | 1 | 2 | 2 | 3 | 6 | 1 | 3 | 3 |
| 74 | 1 | 2 | 2 | 2 | 6 | 1 | 2 | 6 |
| 75 | 5 | 2 | 3 | 3 | 5 | 1 | 2 | 1 |
| 76 | 4 | 4 | 4 | 4 | 4 | 5 | 5 | 4 |
| 77 | 2 | 1 | 1 | 1 | 4 | 2 | 2 | 2 |
| 78 | 3 | 3 | 2 | 2 | 4 | 3 | 2 | 3 |
| 79 | 7 | 5 | 6 | 5 | 7 | 4 | 2 | 5 |

Supplementary S3: Likert dataTable

|     |   |   |   |   |   |   |   |   |
|-----|---|---|---|---|---|---|---|---|
| 80  | 4 | 3 | 1 | 1 | 7 | 4 | 3 | 4 |
| 81  | 2 | 3 | 2 | 3 | 7 | 3 | 3 | 2 |
| 82  | 2 | 1 | 1 | 1 | 5 | 1 | 1 | 5 |
| 83  | 2 | 1 | 1 | 1 | 3 | 1 | 2 | 3 |
| 84  | 1 | 1 | 1 | 1 | 2 | 1 | 1 | 2 |
| 85  | 2 | 1 | 1 | 1 | 3 | 1 | 2 | 1 |
| 86  | 2 | 2 | 1 | 1 | 3 | 1 | 2 | 2 |
| 87  | 2 | 3 | 3 | 2 | 7 | 3 | 3 | 2 |
| 88  | 2 | 1 | 1 | 1 | 5 | 2 | 2 | 2 |
| 89  | 2 | 1 | 2 | 1 | 5 | 1 | 2 | 2 |
| 90  | 2 | 2 | 1 | 2 | 2 | 2 | 3 | 4 |
| 91  | 2 | 1 | 1 | 1 | 2 | 1 | 3 | 3 |
| 92  | 5 | 1 | 1 | 1 | 7 | 6 | 6 | 1 |
| 93  | 2 | 2 | 2 | 2 | 2 | 1 | 2 | 2 |
| 94  | 2 | 1 | 1 | 1 | 3 | 1 | 3 | 5 |
| 95  | 2 | 2 | 2 | 2 | 3 | 1 | 2 | 2 |
| 96  | 3 | 2 | 2 | 3 | 6 | 3 | 5 | 3 |
| 97  | 2 | 2 | 2 | 2 | 5 | 2 | 5 | 3 |
| 98  | 2 | 2 | 2 | 2 | 5 | 3 | 3 | 3 |
| 99  | 2 | 2 | 2 | 1 | 5 | 2 | 3 | 3 |
| 100 | 2 | 2 | 2 | 2 | 5 | 2 | 3 | 5 |
| 101 | 2 | 2 | 2 | 2 | 5 | 2 | 2 | 3 |
| 102 | 3 | 2 | 2 | 2 | 6 | 3 | 3 | 3 |
| 103 | 2 | 2 | 2 | 2 | 7 | 3 | 5 | 3 |
| 104 | 2 | 2 | 2 | 3 | 6 | 3 | 3 | 3 |
| 105 | 3 | 2 | 2 | 2 | 6 | 1 | 3 | 2 |
| 106 | 2 | 2 | 2 | 2 | 3 | 2 | 2 | 3 |
| 107 | 2 | 2 | 1 | 1 | 5 | 1 | 3 | 3 |
| 108 | 3 | 2 | 1 | 1 | 5 | 2 | 2 | 3 |
| 109 | 3 | 3 | 2 | 3 | 6 | 1 | 3 | 5 |
| 110 | 3 | 2 | 1 | 1 | 6 | 2 | 2 | 3 |
| 111 | 4 | 4 | 4 | 4 | 2 | 1 | 1 | 2 |
| 112 | 2 | 1 | 1 | 1 | 5 | 1 | 1 | 2 |
| 113 | 1 | 6 | 6 | 6 | 7 | 3 | 3 | 6 |
| 114 | 2 | 2 | 2 | 2 | 6 | 2 | 5 | 3 |
| 115 | 1 | 1 | 3 | 3 | 6 | 2 | 3 | 5 |
| 116 | 2 | 2 | 3 | 3 | 6 | 1 | 2 | 3 |
| 117 | 1 | 5 | 2 | 3 | 5 | 1 | 2 | 3 |
| 118 | 4 | 2 | 2 | 2 | 3 | 2 | 2 | 2 |
| 119 | 3 | 2 | 2 | 5 | 5 | 2 | 2 | 3 |
| 120 | 2 | 2 | 2 | 2 | 5 | 2 | 2 | 2 |
| 121 | 2 | 2 | 1 | 1 | 6 | 2 | 2 | 3 |
| 122 | 3 | 5 | 5 | 2 | 6 | 2 | 5 | 5 |
| 123 | 2 | 2 | 2 | 2 | 6 | 2 | 5 | 5 |
| 124 | 2 | 2 | 2 | 2 | 5 | 2 | 2 | 5 |
| 125 | 1 | 1 | 1 | 1 | 5 | 1 | 3 | 5 |
| 126 | 4 | 4 | 4 | 4 | 3 | 2 | 2 | 4 |
| 127 | 2 | 2 | 2 | 5 | 6 | 2 | 3 | 5 |

## Supplementary S3: Likert dataTable

|     |   |   |   |   |   |   |   |   |
|-----|---|---|---|---|---|---|---|---|
| 128 | 3 | 2 | 1 | 5 | 5 | 1 | 2 | 3 |
| 129 | 2 | 2 | 2 | 2 | 6 | 1 | 3 | 5 |
| 130 | 2 | 2 | 2 | 2 | 5 | 2 | 2 | 3 |
| 131 | 1 | 1 | 1 | 1 | 6 | 1 | 2 | 3 |
| 132 | 2 | 2 | 2 | 3 | 6 | 1 | 2 | 2 |
| 133 | 2 | 2 | 2 | 2 | 2 | 1 | 1 | 2 |
| 134 | 3 | 3 | 2 | 2 | 5 | 2 | 2 | 5 |
| 135 | 3 | 2 | 1 | 3 | 5 | 1 | 1 | 2 |
| 136 | 1 | 1 | 1 | 1 | 5 | 1 | 2 | 5 |
| 137 | 2 | 2 | 2 | 2 | 3 | 2 | 2 | 4 |
| 138 | 2 | 1 | 1 | 1 | 3 | 1 | 1 | 3 |
| 139 | 2 | 2 | 1 | 5 | 5 | 1 | 2 | 3 |
| 140 | 2 | 2 | 2 | 2 | 2 | 2 | 2 | 5 |
| 141 | 3 | 2 | 2 | 2 | 5 | 1 | 2 | 5 |
| 142 | 2 | 2 | 2 | 5 | 2 | 1 | 1 | 5 |
| 143 | 6 | 7 | 7 | 7 | 1 | 2 | 1 | 7 |
| 144 | 2 | 3 | 2 | 3 | 6 | 2 | 6 | 3 |
| 145 | 2 | 3 | 2 | 3 | 6 | 1 | 5 | 3 |
| 146 | 2 | 5 | 2 | 3 | 6 | 2 | 5 | 3 |
| 147 | 1 | 2 | 2 | 3 | 6 | 1 | 3 | 3 |
| 148 | 1 | 2 | 2 | 2 | 6 | 1 | 2 | 6 |
| 149 | 5 | 2 | 3 | 3 | 5 | 1 | 2 | 1 |
| 150 | 4 | 4 | 4 | 4 | 4 | 5 | 5 | 4 |
| 151 | 2 | 1 | 1 | 1 | 4 | 2 | 2 | 2 |
| 152 | 3 | 3 | 2 | 2 | 4 | 3 | 2 | 3 |
| 153 | 7 | 5 | 6 | 5 | 7 | 4 | 2 | 5 |
| 154 | 4 | 3 | 1 | 1 | 7 | 4 | 3 | 4 |
| 155 | 2 | 3 | 2 | 3 | 7 | 3 | 3 | 2 |
| 156 | 2 | 1 | 1 | 1 | 5 | 1 | 1 | 5 |
| 157 | 2 | 1 | 1 | 1 | 3 | 1 | 2 | 3 |
| 158 | 1 | 1 | 1 | 1 | 2 | 1 | 1 | 2 |
| 159 | 2 | 1 | 1 | 1 | 3 | 1 | 2 | 1 |
| 160 | 2 | 2 | 1 | 1 | 3 | 1 | 2 | 2 |
| 161 | 2 | 3 | 3 | 2 | 7 | 3 | 3 | 2 |
| 162 | 2 | 1 | 1 | 1 | 5 | 2 | 2 | 2 |
| 163 | 2 | 1 | 2 | 1 | 5 | 1 | 2 | 2 |
| 164 | 2 | 2 | 1 | 2 | 2 | 2 | 3 | 4 |
| 165 | 2 | 1 | 1 | 1 | 2 | 1 | 3 | 3 |
| 166 | 5 | 1 | 1 | 1 | 7 | 6 | 6 | 1 |
| 167 | 2 | 2 | 2 | 2 | 2 | 1 | 2 | 2 |
| 168 | 2 | 1 | 1 | 1 | 3 | 1 | 3 | 5 |
| 169 | 2 | 2 | 2 | 2 | 3 | 1 | 2 | 2 |
| 170 | 3 | 2 | 2 | 3 | 6 | 3 | 5 | 3 |
| 171 | 2 | 2 | 2 | 2 | 5 | 2 | 5 | 3 |
| 172 | 2 | 2 | 2 | 2 | 5 | 3 | 3 | 3 |
| 173 | 2 | 2 | 2 | 1 | 5 | 2 | 3 | 3 |
| 174 | 2 | 2 | 2 | 2 | 5 | 2 | 3 | 5 |
| 175 | 2 | 2 | 2 | 2 | 5 | 2 | 2 | 3 |

Supplementary S3: Likert dataTable

|     |   |   |   |   |   |   |   |   |
|-----|---|---|---|---|---|---|---|---|
| 176 | 3 | 2 | 2 | 2 | 6 | 3 | 3 | 3 |
| 177 | 2 | 2 | 2 | 2 | 7 | 3 | 5 | 3 |
| 178 | 2 | 2 | 2 | 3 | 6 | 3 | 3 | 3 |
| 179 | 3 | 2 | 2 | 2 | 6 | 1 | 3 | 2 |
| 180 | 2 | 2 | 2 | 2 | 3 | 2 | 2 | 3 |
| 181 | 2 | 2 | 1 | 1 | 5 | 1 | 3 | 3 |
| 182 | 3 | 2 | 1 | 1 | 5 | 2 | 2 | 3 |
| 183 | 3 | 3 | 2 | 3 | 6 | 1 | 3 | 5 |
| 184 | 3 | 2 | 1 | 1 | 6 | 2 | 2 | 3 |
| 185 | 4 | 4 | 4 | 4 | 2 | 1 | 1 | 2 |
| 186 | 2 | 1 | 1 | 1 | 5 | 1 | 1 | 2 |
| 187 | 1 | 6 | 6 | 6 | 7 | 3 | 3 | 6 |
| 188 | 2 | 2 | 2 | 2 | 6 | 2 | 5 | 3 |
| 189 | 1 | 1 | 3 | 3 | 6 | 2 | 3 | 5 |
| 190 | 2 | 2 | 3 | 3 | 6 | 1 | 2 | 3 |
| 191 | 1 | 5 | 2 | 3 | 5 | 1 | 2 | 3 |
| 192 | 4 | 2 | 2 | 2 | 3 | 2 | 2 | 2 |
| 193 | 3 | 2 | 2 | 5 | 5 | 2 | 2 | 3 |
| 194 | 2 | 2 | 2 | 2 | 5 | 2 | 2 | 2 |
| 195 | 2 | 2 | 1 | 1 | 6 | 2 | 2 | 3 |
| 196 | 3 | 5 | 5 | 2 | 6 | 2 | 5 | 5 |
| 197 | 2 | 2 | 2 | 2 | 6 | 2 | 5 | 5 |
| 198 | 2 | 2 | 2 | 2 | 5 | 2 | 2 | 5 |
| 199 | 1 | 1 | 1 | 1 | 5 | 1 | 3 | 5 |
| 200 | 4 | 4 | 4 | 4 | 3 | 2 | 2 | 4 |
| 201 | 2 | 2 | 2 | 5 | 6 | 2 | 3 | 5 |
| 202 | 3 | 2 | 1 | 5 | 5 | 1 | 2 | 3 |
| 203 | 2 | 2 | 2 | 2 | 6 | 1 | 3 | 5 |
| 204 | 2 | 2 | 2 | 2 | 5 | 2 | 2 | 3 |
| 205 | 1 | 1 | 1 | 1 | 6 | 1 | 2 | 3 |
| 206 | 2 | 2 | 2 | 3 | 6 | 1 | 2 | 2 |
| 207 | 2 | 2 | 2 | 2 | 2 | 1 | 1 | 2 |
| 208 | 3 | 3 | 2 | 2 | 5 | 2 | 2 | 5 |
| 209 | 3 | 2 | 1 | 3 | 5 | 1 | 1 | 2 |
| 210 | 1 | 1 | 1 | 1 | 5 | 1 | 2 | 5 |
| 211 | 2 | 2 | 2 | 2 | 3 | 2 | 2 | 4 |
| 212 | 2 | 1 | 1 | 1 | 3 | 1 | 1 | 3 |
| 213 | 2 | 2 | 1 | 5 | 5 | 1 | 2 | 3 |
| 214 | 2 | 2 | 2 | 2 | 2 | 2 | 2 | 5 |
| 215 | 3 | 2 | 2 | 2 | 5 | 1 | 2 | 5 |
| 216 | 2 | 2 | 2 | 5 | 2 | 1 | 1 | 5 |

Supplementary S4: dEX fractionTable

| No. | X(1)Q1 | X(1)Q2 | X(1)Q3 | X(2)Q1 | X(2)Q2 | X(2)Q3 | X(2)Q4 | X(2)Q5 |
|-----|--------|--------|--------|--------|--------|--------|--------|--------|
| 1   | 5/6    | 2/3    | 5/6    | 1/3    | 2/3    | 2/3    | 5/6    | 1/3    |
| 2   | 5/6    | 1/2    | 1/2    | 2/3    | 5/6    | 2/3    | 1/2    | 2/3    |
| 3   | 2/3    | 2/3    | 1/6    | 1/3    | 1/3    | 2/3    | 1/6    | 1/6    |
| 4   | 5/6    | 5/6    | 1/3    | 1/2    | 2/3    | 2/3    | 2/3    | 1/2    |
| 5   | 1      | 1/2    | 1/3    | 2/3    | 1      | 1      | 1      | 1      |
| 6   | 1      | 5/6    | 1      | 2/3    | 1      | 1      | 5/6    | 1/2    |
| 7   | 1      | 1      | 2/3    | 1      | 1      | 5/6    | 5/6    | 1/2    |
| 8   | 1      | 2/3    | 1/6    | 1/3    | 1/3    | 2/3    | 2/3    | 0      |
| 9   | 5/6    | 5/6    | 1/6    | 1/3    | 2/3    | 2/3    | 1/6    | 0      |
| 10  | 2/3    | 2/3    | 0      | 1/3    | 1/3    | 2/3    | 1/3    | 0      |
| 11  | 2/3    | 5/6    | 1/6    | 1/6    | 1/3    | 1/3    | 1/3    | 0      |
| 12  | 5/6    | 2/3    | 1/6    | 1/3    | 2/3    | 2/3    | 2/3    | 0      |
| 13  | 1      | 1      | 1/2    | 5/6    | 5/6    | 5/6    | 5/6    | 0      |
| 14  | 5/6    | 5/6    | 5/6    | 1/3    | 1/3    | 2/3    | 2/3    | 0      |
| 15  | 1      | 2/3    | 2/3    | 1/3    | 2/3    | 5/6    | 2/3    | 0      |
| 16  | 5/6    | 2/3    | 1/3    | 1/6    | 1/2    | 2/3    | 2/3    | 1/6    |
| 17  | 1      | 1      | 2/3    | 2/3    | 1/3    | 5/6    | 1/3    | 0      |
| 18  | 5/6    | 2/3    | 2/3    | 5/6    | 1      | 2/3    | 5/6    | 1/2    |
| 19  | 5/6    | 1/3    | 1/6    | 1/3    | 1/6    | 1/3    | 1/6    | 1/6    |
| 20  | 5/6    | 2/3    | 1/6    | 1/3    | 1/3    | 2/3    | 1/6    | 0      |
| 21  | 5/6    | 2/3    | 1/6    | 1/3    | 2/3    | 2/3    | 1/3    | 0      |
| 22  | 1      | 1      | 5/6    | 2/3    | 5/6    | 5/6    | 5/6    | 1/6    |
| 23  | 5/6    | 5/6    | 2/3    | 2/3    | 5/6    | 5/6    | 5/6    | 1/6    |
| 24  | 1      | 5/6    | 2/3    | 5/6    | 5/6    | 5/6    | 5/6    | 1/3    |
| 25  | 2/3    | 5/6    | 1/3    | 2/3    | 2/3    | 5/6    | 2/3    | 0      |
| 26  | 5/6    | 5/6    | 1/3    | 2/3    | 2/3    | 5/6    | 2/3    | 0      |
| 27  | 5/6    | 2/3    | 1/3    | 2/3    | 5/6    | 5/6    | 5/6    | 1/6    |
| 28  | 5/6    | 2/3    | 5/6    | 2/3    | 5/6    | 5/6    | 5/6    | 1/3    |
| 29  | 1      | 1      | 5/6    | 5/6    | 5/6    | 5/6    | 5/6    | 1/3    |
| 30  | 5/6    | 1      | 5/6    | 5/6    | 5/6    | 5/6    | 5/6    | 1/6    |
| 31  | 5/6    | 2/3    | 2/3    | 5/6    | 5/6    | 5/6    | 5/6    | 1/6    |
| 32  | 5/6    | 2/3    | 2/3    | 1/3    | 2/3    | 5/6    | 1/3    | 1/6    |
| 33  | 5/6    | 2/3    | 2/3    | 1/3    | 2/3    | 5/6    | 2/3    | 0      |
| 34  | 5/6    | 2/3    | 2/3    | 2/3    | 2/3    | 5/6    | 5/6    | 1/6    |
| 35  | 5/6    | 2/3    | 5/6    | 5/6    | 5/6    | 5/6    | 5/6    | 1/3    |
| 36  | 5/6    | 1      | 2/3    | 5/6    | 5/6    | 5/6    | 5/6    | 1/6    |
| 37  | 5/6    | 1/3    | 1/3    | 1/6    | 1/6    | 1/6    | 1/6    | 0      |
| 38  | 5/6    | 2/3    | 1/3    | 1/3    | 5/6    | 5/6    | 2/3    | 1/6    |
| 39  | 2/3    | 1/6    | 0      | 0      | 0      | 0      | 0      | 0      |
| 40  | 5/6    | 1      | 5/6    | 1      | 1      | 1      | 5/6    | 1/3    |
| 41  | 1      | 1      | 2/3    | 5/6    | 5/6    | 5/6    | 5/6    | 1/6    |
| 42  | 1      | 5/6    | 5/6    | 5/6    | 5/6    | 5/6    | 2/3    | 1/6    |
| 43  | 5/6    | 5/6    | 5/6    | 2/3    | 5/6    | 5/6    | 2/3    | 1/3    |
| 44  | 5/6    | 1/3    | 1/6    | 1/6    | 1/6    | 1/3    | 1/6    | 1/6    |

## Supplementary S4: dEX fractionTable

|    |     |     |     |     |     |     |     |     |
|----|-----|-----|-----|-----|-----|-----|-----|-----|
| 45 | 1   | 5/6 | 5/6 | 5/6 | 5/6 | 5/6 | 5/6 | 1/3 |
| 46 | 1   | 2/3 | 2/3 | 2/3 | 5/6 | 5/6 | 2/3 | 1/6 |
| 47 | 5/6 | 5/6 | 2/3 | 5/6 | 5/6 | 5/6 | 5/6 | 1/3 |
| 48 | 1   | 5/6 | 5/6 | 5/6 | 5/6 | 5/6 | 5/6 | 1/3 |
| 49 | 5/6 | 5/6 | 5/6 | 2/3 | 5/6 | 5/6 | 2/3 | 1/3 |
| 50 | 5/6 | 2/3 | 5/6 | 1/6 | 2/3 | 2/3 | 1/3 | 1/6 |
| 51 | 5/6 | 2/3 | 1/3 | 1/3 | 5/6 | 2/3 | 1/3 | 0   |
| 52 | 2/3 | 1   | 5/6 | 1/6 | 2/3 | 5/6 | 1/6 | 1/6 |
| 53 | 5/6 | 2/3 | 5/6 | 2/3 | 5/6 | 5/6 | 5/6 | 1/3 |
| 54 | 5/6 | 1/3 | 2/3 | 2/3 | 5/6 | 2/3 | 2/3 | 1/6 |
| 55 | 5/6 | 5/6 | 2/3 | 2/3 | 5/6 | 5/6 | 5/6 | 1/3 |
| 56 | 1   | 2/3 | 5/6 | 2/3 | 5/6 | 5/6 | 5/6 | 1/6 |
| 57 | 5/6 | 5/6 | 2/3 | 5/6 | 5/6 | 5/6 | 2/3 | 1/6 |
| 58 | 5/6 | 1   | 1/3 | 1/6 | 2/3 | 2/3 | 1/6 | 5/6 |
| 59 | 2/3 | 1/3 | 1/3 | 1/6 | 1/6 | 2/3 | 1/6 | 1/6 |
| 60 | 1   | 5/6 | 5/6 | 2/3 | 5/6 | 5/6 | 2/3 | 1/3 |
| 61 | 5/6 | 5/6 | 2/3 | 2/3 | 5/6 | 5/6 | 2/3 | 1/3 |
| 62 | 5/6 | 2/3 | 2/3 | 5/6 | 5/6 | 5/6 | 1/3 | 1/6 |
| 63 | 2/3 | 1/3 | 1/6 | 1/6 | 1/6 | 1/6 | 1/6 | 0   |
| 64 | 2/3 | 5/6 | 5/6 | 1/6 | 2/3 | 2/3 | 1/6 | 1/6 |
| 65 | 5/6 | 2/3 | 2/3 | 2/3 | 5/6 | 1   | 2/3 | 1/6 |
| 66 | 5/6 | 2/3 | 1/6 | 1/3 | 2/3 | 2/3 | 1/6 | 1/6 |
| 67 | 5/6 | 2/3 | 5/6 | 2/3 | 5/6 | 5/6 | 5/6 | 1/3 |
| 68 | 2/3 | 2/3 | 2/3 | 1/6 | 2/3 | 2/3 | 1/3 | 1/6 |
| 69 | 0   | 1/6 | 1   | 0   | 0   | 0   | 0   | 5/6 |
| 70 | 5/6 | 5/6 | 5/6 | 2/3 | 5/6 | 5/6 | 5/6 | 1/6 |
| 71 | 5/6 | 5/6 | 2/3 | 2/3 | 5/6 | 5/6 | 5/6 | 1/6 |
| 72 | 5/6 | 5/6 | 2/3 | 2/3 | 5/6 | 5/6 | 5/6 | 1/6 |
| 73 | 5/6 | 2/3 | 1/6 | 2/3 | 2/3 | 5/6 | 5/6 | 0   |
| 74 | 1   | 1/3 | 5/6 | 5/6 | 1   | 5/6 | 5/6 | 1/3 |
| 75 | 5/6 | 2/3 | 5/6 | 1/3 | 2/3 | 2/3 | 5/6 | 1/3 |
| 76 | 5/6 | 1/2 | 1/2 | 2/3 | 5/6 | 2/3 | 1/2 | 2/3 |
| 77 | 2/3 | 2/3 | 1/6 | 1/3 | 1/3 | 2/3 | 1/6 | 1/6 |
| 78 | 5/6 | 5/6 | 1/3 | 1/2 | 2/3 | 2/3 | 2/3 | 1/2 |
| 79 | 1   | 1/2 | 1/3 | 2/3 | 1   | 1   | 1   | 1   |
| 80 | 1   | 5/6 | 1   | 2/3 | 1   | 1   | 5/6 | 1/2 |
| 81 | 1   | 1   | 2/3 | 1   | 1   | 5/6 | 5/6 | 1/2 |
| 82 | 1   | 2/3 | 1/6 | 1/3 | 1/3 | 2/3 | 2/3 | 0   |
| 83 | 5/6 | 5/6 | 1/6 | 1/3 | 2/3 | 2/3 | 1/6 | 0   |
| 84 | 2/3 | 2/3 | 0   | 1/3 | 1/3 | 2/3 | 1/3 | 0   |
| 85 | 2/3 | 5/6 | 1/6 | 1/6 | 1/3 | 1/3 | 1/3 | 0   |
| 86 | 5/6 | 2/3 | 1/6 | 1/3 | 2/3 | 2/3 | 2/3 | 0   |
| 87 | 1   | 1   | 1/2 | 5/6 | 5/6 | 5/6 | 5/6 | 0   |
| 88 | 5/6 | 5/6 | 5/6 | 1/3 | 1/3 | 2/3 | 2/3 | 0   |
| 89 | 1   | 2/3 | 2/3 | 1/3 | 2/3 | 5/6 | 2/3 | 0   |
| 90 | 5/6 | 2/3 | 1/3 | 1/6 | 1/2 | 2/3 | 2/3 | 1/6 |
| 91 | 1   | 1   | 2/3 | 2/3 | 1/3 | 5/6 | 1/3 | 0   |
| 92 | 5/6 | 2/3 | 2/3 | 5/6 | 1   | 2/3 | 5/6 | 1/2 |

## Supplementary S4: dEX fractionTable

|     |     |     |     |     |     |     |     |     |
|-----|-----|-----|-----|-----|-----|-----|-----|-----|
| 93  | 5/6 | 1/3 | 1/6 | 1/3 | 1/6 | 1/3 | 1/6 | 1/6 |
| 94  | 5/6 | 2/3 | 1/6 | 1/3 | 1/3 | 2/3 | 1/6 | 0   |
| 95  | 5/6 | 2/3 | 1/6 | 1/3 | 2/3 | 2/3 | 1/3 | 0   |
| 96  | 1   | 1   | 5/6 | 2/3 | 5/6 | 5/6 | 5/6 | 1/6 |
| 97  | 5/6 | 5/6 | 2/3 | 2/3 | 5/6 | 5/6 | 5/6 | 1/6 |
| 98  | 1   | 5/6 | 2/3 | 5/6 | 5/6 | 5/6 | 5/6 | 1/3 |
| 99  | 2/3 | 5/6 | 1/3 | 2/3 | 2/3 | 5/6 | 2/3 | 0   |
| 100 | 5/6 | 5/6 | 1/3 | 2/3 | 2/3 | 5/6 | 2/3 | 0   |
| 101 | 5/6 | 2/3 | 1/3 | 2/3 | 5/6 | 5/6 | 5/6 | 1/6 |
| 102 | 5/6 | 2/3 | 5/6 | 2/3 | 5/6 | 5/6 | 5/6 | 1/3 |
| 103 | 1   | 1   | 5/6 | 5/6 | 5/6 | 5/6 | 5/6 | 1/3 |
| 104 | 5/6 | 1   | 5/6 | 5/6 | 5/6 | 5/6 | 5/6 | 1/6 |
| 105 | 5/6 | 2/3 | 2/3 | 5/6 | 5/6 | 5/6 | 5/6 | 1/6 |
| 106 | 5/6 | 2/3 | 2/3 | 1/3 | 2/3 | 5/6 | 1/3 | 1/6 |
| 107 | 5/6 | 2/3 | 2/3 | 1/3 | 2/3 | 5/6 | 2/3 | 0   |
| 108 | 5/6 | 2/3 | 2/3 | 2/3 | 2/3 | 5/6 | 5/6 | 1/6 |
| 109 | 5/6 | 2/3 | 5/6 | 5/6 | 5/6 | 5/6 | 5/6 | 1/3 |
| 110 | 5/6 | 1   | 2/3 | 5/6 | 5/6 | 5/6 | 5/6 | 1/6 |
| 111 | 5/6 | 1/3 | 1/3 | 1/6 | 1/6 | 1/6 | 1/6 | 0   |
| 112 | 5/6 | 2/3 | 1/3 | 1/3 | 5/6 | 5/6 | 2/3 | 1/6 |
| 113 | 2/3 | 1/6 | 0   | 0   | 0   | 0   | 0   | 0   |
| 114 | 5/6 | 1   | 5/6 | 1   | 1   | 1   | 5/6 | 1/3 |
| 115 | 1   | 1   | 2/3 | 5/6 | 5/6 | 5/6 | 5/6 | 1/6 |
| 116 | 1   | 5/6 | 5/6 | 5/6 | 5/6 | 5/6 | 2/3 | 1/6 |
| 117 | 5/6 | 5/6 | 5/6 | 2/3 | 5/6 | 5/6 | 2/3 | 1/3 |
| 118 | 5/6 | 1/3 | 1/6 | 1/6 | 1/6 | 1/3 | 1/6 | 1/6 |
| 119 | 1   | 5/6 | 5/6 | 5/6 | 5/6 | 5/6 | 5/6 | 1/3 |
| 120 | 1   | 2/3 | 2/3 | 2/3 | 5/6 | 5/6 | 2/3 | 1/6 |
| 121 | 5/6 | 5/6 | 2/3 | 5/6 | 5/6 | 5/6 | 5/6 | 1/3 |
| 122 | 1   | 5/6 | 5/6 | 5/6 | 5/6 | 5/6 | 5/6 | 1/3 |
| 123 | 5/6 | 5/6 | 5/6 | 2/3 | 5/6 | 5/6 | 2/3 | 1/3 |
| 124 | 5/6 | 2/3 | 5/6 | 1/6 | 2/3 | 2/3 | 1/3 | 1/6 |
| 125 | 5/6 | 2/3 | 1/3 | 1/3 | 5/6 | 2/3 | 1/3 | 0   |
| 126 | 2/3 | 1   | 5/6 | 1/6 | 2/3 | 5/6 | 1/6 | 1/6 |
| 127 | 5/6 | 2/3 | 5/6 | 2/3 | 5/6 | 5/6 | 5/6 | 1/3 |
| 128 | 5/6 | 1/3 | 2/3 | 2/3 | 5/6 | 2/3 | 2/3 | 1/6 |
| 129 | 5/6 | 5/6 | 2/3 | 2/3 | 5/6 | 5/6 | 5/6 | 1/3 |
| 130 | 1   | 2/3 | 5/6 | 2/3 | 5/6 | 5/6 | 5/6 | 1/6 |
| 131 | 5/6 | 5/6 | 2/3 | 5/6 | 5/6 | 5/6 | 2/3 | 1/6 |
| 132 | 5/6 | 1   | 1/3 | 1/6 | 2/3 | 2/3 | 1/6 | 5/6 |
| 133 | 2/3 | 1/3 | 1/3 | 1/6 | 1/6 | 2/3 | 1/6 | 1/6 |
| 134 | 1   | 5/6 | 5/6 | 2/3 | 5/6 | 5/6 | 2/3 | 1/3 |
| 135 | 5/6 | 5/6 | 2/3 | 2/3 | 5/6 | 5/6 | 2/3 | 1/3 |
| 136 | 5/6 | 2/3 | 2/3 | 5/6 | 5/6 | 5/6 | 1/3 | 1/6 |
| 137 | 2/3 | 1/3 | 1/6 | 1/6 | 1/6 | 1/6 | 1/6 | 0   |
| 138 | 2/3 | 5/6 | 5/6 | 1/6 | 2/3 | 2/3 | 1/6 | 1/6 |
| 139 | 5/6 | 2/3 | 2/3 | 2/3 | 5/6 | 1   | 2/3 | 1/6 |
| 140 | 5/6 | 2/3 | 1/6 | 1/3 | 2/3 | 2/3 | 1/6 | 1/6 |



## Supplementary S4: dEX fractionTable

|     |     |     |     |     |     |     |     |     |
|-----|-----|-----|-----|-----|-----|-----|-----|-----|
| 141 | 5/6 | 2/3 | 5/6 | 2/3 | 5/6 | 5/6 | 5/6 | 1/3 |
| 142 | 2/3 | 2/3 | 2/3 | 1/6 | 2/3 | 2/3 | 1/3 | 1/6 |
| 143 | 0   | 1/6 | 1   | 0   | 0   | 0   | 0   | 5/6 |
| 144 | 5/6 | 5/6 | 5/6 | 2/3 | 5/6 | 5/6 | 5/6 | 1/6 |
| 145 | 5/6 | 5/6 | 2/3 | 2/3 | 5/6 | 5/6 | 5/6 | 1/6 |
| 146 | 5/6 | 5/6 | 2/3 | 2/3 | 5/6 | 5/6 | 5/6 | 1/6 |
| 147 | 5/6 | 2/3 | 1/6 | 2/3 | 2/3 | 5/6 | 5/6 | 0   |
| 148 | 1   | 1/3 | 5/6 | 5/6 | 1   | 5/6 | 5/6 | 1/3 |
| 149 | 5/6 | 2/3 | 5/6 | 1/3 | 2/3 | 2/3 | 5/6 | 1/3 |
| 150 | 5/6 | 1/2 | 1/2 | 2/3 | 5/6 | 2/3 | 1/2 | 2/3 |
| 151 | 2/3 | 2/3 | 1/6 | 1/3 | 1/3 | 2/3 | 1/6 | 1/6 |
| 152 | 5/6 | 5/6 | 1/3 | 1/2 | 2/3 | 2/3 | 2/3 | 1/2 |
| 153 | 1   | 1/2 | 1/3 | 2/3 | 1   | 1   | 1   | 1   |
| 154 | 1   | 5/6 | 1   | 2/3 | 1   | 1   | 5/6 | 1/2 |
| 155 | 1   | 1   | 2/3 | 1   | 1   | 5/6 | 5/6 | 1/2 |
| 156 | 1   | 2/3 | 1/6 | 1/3 | 1/3 | 2/3 | 2/3 | 0   |
| 157 | 5/6 | 5/6 | 1/6 | 1/3 | 2/3 | 2/3 | 1/6 | 0   |
| 158 | 2/3 | 2/3 | 0   | 1/3 | 1/3 | 2/3 | 1/3 | 0   |
| 159 | 2/3 | 5/6 | 1/6 | 1/6 | 1/3 | 1/3 | 1/3 | 0   |
| 160 | 5/6 | 2/3 | 1/6 | 1/3 | 2/3 | 2/3 | 2/3 | 0   |
| 161 | 1   | 1   | 1/2 | 5/6 | 5/6 | 5/6 | 5/6 | 0   |
| 162 | 5/6 | 5/6 | 5/6 | 1/3 | 1/3 | 2/3 | 2/3 | 0   |
| 163 | 1   | 2/3 | 2/3 | 1/3 | 2/3 | 5/6 | 2/3 | 0   |
| 164 | 5/6 | 2/3 | 1/3 | 1/6 | 1/2 | 2/3 | 2/3 | 1/6 |
| 165 | 1   | 1   | 2/3 | 2/3 | 1/3 | 5/6 | 1/3 | 0   |
| 166 | 5/6 | 2/3 | 2/3 | 5/6 | 1   | 2/3 | 5/6 | 1/2 |
| 167 | 5/6 | 1/3 | 1/6 | 1/3 | 1/6 | 1/3 | 1/6 | 1/6 |
| 168 | 5/6 | 2/3 | 1/6 | 1/3 | 1/3 | 2/3 | 1/6 | 0   |
| 169 | 5/6 | 2/3 | 1/6 | 1/3 | 2/3 | 2/3 | 1/3 | 0   |
| 170 | 1   | 1   | 5/6 | 2/3 | 5/6 | 5/6 | 5/6 | 1/6 |
| 171 | 5/6 | 5/6 | 2/3 | 2/3 | 5/6 | 5/6 | 5/6 | 1/6 |
| 172 | 1   | 5/6 | 2/3 | 5/6 | 5/6 | 5/6 | 5/6 | 1/3 |
| 173 | 2/3 | 5/6 | 1/3 | 2/3 | 2/3 | 5/6 | 2/3 | 0   |
| 174 | 5/6 | 5/6 | 1/3 | 2/3 | 2/3 | 5/6 | 2/3 | 0   |
| 175 | 5/6 | 2/3 | 1/3 | 2/3 | 5/6 | 5/6 | 5/6 | 1/6 |
| 176 | 5/6 | 2/3 | 5/6 | 2/3 | 5/6 | 5/6 | 5/6 | 1/3 |
| 177 | 1   | 1   | 5/6 | 5/6 | 5/6 | 5/6 | 5/6 | 1/3 |
| 178 | 5/6 | 1   | 5/6 | 5/6 | 5/6 | 5/6 | 5/6 | 1/6 |
| 179 | 5/6 | 2/3 | 2/3 | 5/6 | 5/6 | 5/6 | 5/6 | 1/6 |
| 180 | 5/6 | 2/3 | 2/3 | 1/3 | 2/3 | 5/6 | 1/3 | 1/6 |
| 181 | 5/6 | 2/3 | 2/3 | 1/3 | 2/3 | 5/6 | 2/3 | 0   |
| 182 | 5/6 | 2/3 | 2/3 | 2/3 | 2/3 | 5/6 | 5/6 | 1/6 |
| 183 | 5/6 | 2/3 | 5/6 | 5/6 | 5/6 | 5/6 | 5/6 | 1/3 |
| 184 | 5/6 | 1   | 2/3 | 5/6 | 5/6 | 5/6 | 5/6 | 1/6 |
| 185 | 5/6 | 1/3 | 1/3 | 1/6 | 1/6 | 1/6 | 1/6 | 0   |
| 186 | 5/6 | 2/3 | 1/3 | 1/3 | 5/6 | 5/6 | 2/3 | 1/6 |
| 187 | 2/3 | 1/6 | 0   | 0   | 0   | 0   | 0   | 0   |
| 188 | 5/6 | 1   | 5/6 | 1   | 1   | 1   | 5/6 | 1/3 |

## Supplementary S4: dEX fractionTable

| 189 | 1      | 1      | 2/3    | 5/6    | 5/6    | 5/6    | 5/6    | 1/6    |
|-----|--------|--------|--------|--------|--------|--------|--------|--------|
| 190 | 1      | 5/6    | 5/6    | 5/6    | 5/6    | 5/6    | 2/3    | 1/6    |
| 191 | 5/6    | 5/6    | 5/6    | 2/3    | 5/6    | 5/6    | 2/3    | 1/3    |
| 192 | 5/6    | 1/3    | 1/6    | 1/6    | 1/6    | 1/3    | 1/6    | 1/6    |
| 193 | 1      | 5/6    | 5/6    | 5/6    | 5/6    | 5/6    | 5/6    | 1/3    |
| 194 | 1      | 2/3    | 2/3    | 2/3    | 5/6    | 5/6    | 2/3    | 1/6    |
| 195 | 5/6    | 5/6    | 2/3    | 5/6    | 5/6    | 5/6    | 5/6    | 1/3    |
| 196 | 1      | 5/6    | 5/6    | 5/6    | 5/6    | 5/6    | 5/6    | 1/3    |
| 197 | 5/6    | 5/6    | 5/6    | 2/3    | 5/6    | 5/6    | 2/3    | 1/3    |
| 198 | 5/6    | 2/3    | 5/6    | 1/6    | 2/3    | 2/3    | 1/3    | 1/6    |
| 199 | 5/6    | 2/3    | 1/3    | 1/3    | 5/6    | 2/3    | 1/3    | 0      |
| 200 | 2/3    | 1      | 5/6    | 1/6    | 2/3    | 5/6    | 1/6    | 1/6    |
| 201 | 5/6    | 2/3    | 5/6    | 2/3    | 5/6    | 5/6    | 5/6    | 1/3    |
| 202 | 5/6    | 1/3    | 2/3    | 2/3    | 5/6    | 2/3    | 2/3    | 1/6    |
| 203 | 5/6    | 5/6    | 2/3    | 2/3    | 5/6    | 5/6    | 5/6    | 1/3    |
| 204 | 1      | 2/3    | 5/6    | 2/3    | 5/6    | 5/6    | 5/6    | 1/6    |
| 205 | 5/6    | 5/6    | 2/3    | 5/6    | 5/6    | 5/6    | 2/3    | 1/6    |
| 206 | 5/6    | 1      | 1/3    | 1/6    | 2/3    | 2/3    | 1/6    | 5/6    |
| 207 | 2/3    | 1/3    | 1/3    | 1/6    | 1/6    | 2/3    | 1/6    | 1/6    |
| 208 | 1      | 5/6    | 5/6    | 2/3    | 5/6    | 5/6    | 2/3    | 1/3    |
| 209 | 5/6    | 5/6    | 2/3    | 2/3    | 5/6    | 5/6    | 2/3    | 1/3    |
| 210 | 5/6    | 2/3    | 2/3    | 5/6    | 5/6    | 5/6    | 1/3    | 1/6    |
| 211 | 2/3    | 1/3    | 1/6    | 1/6    | 1/6    | 1/6    | 1/6    | 0      |
| 212 | 2/3    | 5/6    | 5/6    | 1/6    | 2/3    | 2/3    | 1/6    | 1/6    |
| 213 | 5/6    | 2/3    | 2/3    | 2/3    | 5/6    | 1      | 2/3    | 1/6    |
| 214 | 5/6    | 2/3    | 1/6    | 1/3    | 2/3    | 2/3    | 1/6    | 1/6    |
| 215 | 5/6    | 2/3    | 5/6    | 2/3    | 5/6    | 5/6    | 5/6    | 1/3    |
| 216 | 2/3    | 2/3    | 2/3    | 1/6    | 2/3    | 2/3    | 1/3    | 1/6    |
| No. | x(2)Q6 | x(2)Q7 | x(3)Q1 | x(3)Q2 | x(4)Q1 | x(4)Q2 | x(4)Q3 | x(5)Q1 |
| 1   | 2/3    | 1/6    | 1/6    | 1/3    | 5/6    | 5/6    | 2/3    | 5/6    |
| 2   | 1/2    | 1/2    | 1/2    | 2/3    | 2/3    | 5/6    | 2/3    | 1      |
| 3   | 1/3    | 1/6    | 0      | 0      | 1/2    | 2/3    | 2/3    | 5/6    |
| 4   | 2/3    | 1/2    | 1/2    | 1/3    | 2/3    | 5/6    | 2/3    | 1      |
| 5   | 1      | 1      | 1/3    | 1/2    | 1      | 1      | 1      | 1      |
| 6   | 1      | 2/3    | 1/2    | 1/2    | 5/6    | 1      | 1      | 1      |
| 7   | 1      | 2/3    | 2/3    | 1/3    | 5/6    | 1      | 2/3    | 1      |
| 8   | 2/3    | 1/3    | 1/6    | 0      | 2/3    | 1      | 2/3    | 1      |
| 9   | 1/6    | 1/6    | 0      | 0      | 2/3    | 5/6    | 1/3    | 1      |
| 10  | 1/6    | 1/6    | 0      | 0      | 1/2    | 2/3    | 1/3    | 5/6    |
| 11  | 1/3    | 1/3    | 0      | 0      | 2/3    | 2/3    | 2/3    | 1      |
| 12  | 1/3    | 1/6    | 0      | 0      | 2/3    | 5/6    | 2/3    | 1      |
| 13  | 5/6    | 2/3    | 1/3    | 1/6    | 5/6    | 1      | 5/6    | 1      |
| 14  | 5/6    | 0      | 0      | 0      | 2/3    | 5/6    | 2/3    | 1      |
| 15  | 2/3    | 1/6    | 0      | 0      | 2/3    | 1      | 1      | 1      |
| 16  | 1/3    | 1/3    | 1/3    | 1/6    | 2/3    | 5/6    | 2/3    | 5/6    |
| 17  | 1/3    | 1/3    | 1/6    | 1/6    | 2/3    | 1      | 2/3    | 5/6    |

## Supplementary S4: dEX fractionTable

|    |     |     |     |     |     |     |     |     |
|----|-----|-----|-----|-----|-----|-----|-----|-----|
| 18 | 1   | 1   | 1   | 1   | 5/6 | 5/6 | 5/6 | 1   |
| 19 | 1/3 | 1/3 | 1/6 | 1/6 | 2/3 | 5/6 | 5/6 | 5/6 |
| 20 | 1/6 | 1/6 | 0   | 0   | 2/3 | 5/6 | 2/3 | 1   |
| 21 | 1/3 | 1/6 | 1/6 | 1/6 | 2/3 | 5/6 | 2/3 | 5/6 |
| 22 | 5/6 | 2/3 | 5/6 | 2/3 | 1   | 1   | 1   | 1   |
| 23 | 5/6 | 2/3 | 2/3 | 1/6 | 5/6 | 5/6 | 5/6 | 1   |
| 24 | 5/6 | 2/3 | 2/3 | 1/6 | 5/6 | 1   | 5/6 | 1   |
| 25 | 1/6 | 1/6 | 1/6 | 1/6 | 2/3 | 2/3 | 2/3 | 5/6 |
| 26 | 1/3 | 1/3 | 1/6 | 1/6 | 5/6 | 5/6 | 5/6 | 5/6 |
| 27 | 1/3 | 1/3 | 1/6 | 1/6 | 5/6 | 5/6 | 5/6 | 5/6 |
| 28 | 5/6 | 1/3 | 1/3 | 1/6 | 5/6 | 5/6 | 5/6 | 5/6 |
| 29 | 5/6 | 5/6 | 2/3 | 1/3 | 1   | 1   | 5/6 | 1   |
| 30 | 2/3 | 1/3 | 1/3 | 1/6 | 5/6 | 5/6 | 2/3 | 5/6 |
| 31 | 5/6 | 1/3 | 1/6 | 1/6 | 5/6 | 5/6 | 5/6 | 5/6 |
| 32 | 1/3 | 1/6 | 1/6 | 1/6 | 2/3 | 5/6 | 2/3 | 5/6 |
| 33 | 1/3 | 1/6 | 1/6 | 1/6 | 2/3 | 5/6 | 2/3 | 1   |
| 34 | 1/3 | 1/6 | 1/6 | 1/6 | 5/6 | 5/6 | 2/3 | 5/6 |
| 35 | 5/6 | 1/3 | 1/3 | 0   | 5/6 | 5/6 | 5/6 | 1   |
| 36 | 5/6 | 1/6 | 1/6 | 1/6 | 5/6 | 5/6 | 5/6 | 1   |
| 37 | 1/6 | 1/6 | 1/6 | 1/6 | 2/3 | 5/6 | 1/6 | 5/6 |
| 38 | 1/3 | 1/6 | 1/6 | 1/6 | 5/6 | 5/6 | 2/3 | 1   |
| 39 | 0   | 0   | 0   | 0   | 1/6 | 2/3 | 0   | 2/3 |
| 40 | 1   | 5/6 | 2/3 | 1/3 | 5/6 | 5/6 | 2/3 | 1   |
| 41 | 2/3 | 1/6 | 1/6 | 1/6 | 5/6 | 1   | 2/3 | 5/6 |
| 42 | 5/6 | 1/6 | 2/3 | 1/6 | 5/6 | 1   | 2/3 | 5/6 |
| 43 | 2/3 | 1/3 | 1/6 | 1/6 | 5/6 | 5/6 | 2/3 | 5/6 |
| 44 | 1/6 | 1/6 | 1/6 | 1/6 | 2/3 | 5/6 | 2/3 | 5/6 |
| 45 | 2/3 | 1/3 | 1/3 | 1/6 | 5/6 | 1   | 2/3 | 1   |
| 46 | 2/3 | 1/6 | 1/6 | 1/6 | 5/6 | 1   | 2/3 | 5/6 |
| 47 | 5/6 | 1/6 | 1/6 | 1/6 | 5/6 | 5/6 | 2/3 | 5/6 |
| 48 | 2/3 | 1/6 | 1/3 | 1/3 | 5/6 | 1   | 2/3 | 1   |
| 49 | 5/6 | 1/6 | 5/6 | 1/6 | 5/6 | 5/6 | 2/3 | 1   |
| 50 | 1/3 | 1/6 | 0   | 0   | 5/6 | 5/6 | 2/3 | 5/6 |
| 51 | 1/3 | 0   | 1/6 | 0   | 2/3 | 5/6 | 2/3 | 1   |
| 52 | 1/6 | 0   | 0   | 0   | 2/3 | 2/3 | 1/3 | 5/6 |
| 53 | 5/6 | 1/3 | 1/3 | 2/3 | 5/6 | 5/6 | 2/3 | 1   |
| 54 | 2/3 | 1/6 | 1/6 | 1/6 | 2/3 | 5/6 | 2/3 | 5/6 |
| 55 | 5/6 | 2/3 | 1/3 | 1/6 | 2/3 | 5/6 | 2/3 | 1   |
| 56 | 2/3 | 0   | 1/6 | 0   | 2/3 | 1   | 2/3 | 1   |
| 57 | 2/3 | 1/6 | 1/3 | 1/3 | 2/3 | 5/6 | 2/3 | 1   |
| 58 | 2/3 | 1/6 | 1/3 | 0   | 2/3 | 5/6 | 1/3 | 5/6 |
| 59 | 1/6 | 1/6 | 1/6 | 0   | 2/3 | 2/3 | 0   | 2/3 |
| 60 | 2/3 | 1/3 | 1/3 | 1/6 | 5/6 | 1   | 2/3 | 1   |
| 61 | 5/6 | 1/3 | 5/6 | 1/3 | 5/6 | 5/6 | 2/3 | 1   |
| 62 | 2/3 | 1/6 | 1/6 | 1/6 | 5/6 | 5/6 | 5/6 | 1   |
| 63 | 1/6 | 1/6 | 1/6 | 1/6 | 2/3 | 2/3 | 1/6 | 5/6 |
| 64 | 1/3 | 1/6 | 1/3 | 0   | 2/3 | 2/3 | 1/3 | 5/6 |
| 65 | 2/3 | 1/3 | 1/3 | 1/6 | 5/6 | 5/6 | 2/3 | 1   |

## Supplementary S4: dEX fractionTable

|     |     |     |     |     |     |     |     |     |
|-----|-----|-----|-----|-----|-----|-----|-----|-----|
| 66  | 1/6 | 1/6 | 1/6 | 0   | 2/3 | 5/6 | 1/6 | 5/6 |
| 67  | 2/3 | 1/6 | 2/3 | 0   | 5/6 | 5/6 | 2/3 | 1   |
| 68  | 1/6 | 1/6 | 1/3 | 1/6 | 2/3 | 2/3 | 0   | 5/6 |
| 69  | 0   | 5/6 | 1   | 5/6 | 0   | 0   | 0   | 2/3 |
| 70  | 5/6 | 5/6 | 2/3 | 1/3 | 5/6 | 5/6 | 1/3 | 1   |
| 71  | 5/6 | 2/3 | 2/3 | 1/6 | 5/6 | 5/6 | 2/3 | 1   |
| 72  | 2/3 | 2/3 | 1/3 | 1/6 | 1/6 | 5/6 | 2/3 | 1   |
| 73  | 5/6 | 2/3 | 1/3 | 0   | 2/3 | 5/6 | 1/3 | 5/6 |
| 74  | 5/6 | 5/6 | 2/3 | 1/6 | 5/6 | 1   | 2/3 | 1   |
| 75  | 2/3 | 1/6 | 1/6 | 1/3 | 5/6 | 5/6 | 2/3 | 5/6 |
| 76  | 1/2 | 1/2 | 1/2 | 2/3 | 2/3 | 5/6 | 2/3 | 1   |
| 77  | 1/3 | 1/6 | 0   | 0   | 1/2 | 2/3 | 2/3 | 5/6 |
| 78  | 2/3 | 1/2 | 1/2 | 1/3 | 2/3 | 5/6 | 2/3 | 1   |
| 79  | 1   | 1   | 1/3 | 1/2 | 1   | 1   | 1   | 1   |
| 80  | 1   | 2/3 | 1/2 | 1/2 | 5/6 | 1   | 1   | 1   |
| 81  | 1   | 2/3 | 2/3 | 1/3 | 5/6 | 1   | 2/3 | 1   |
| 82  | 2/3 | 1/3 | 1/6 | 0   | 2/3 | 1   | 2/3 | 1   |
| 83  | 1/6 | 1/6 | 0   | 0   | 2/3 | 5/6 | 1/3 | 1   |
| 84  | 1/6 | 1/6 | 0   | 0   | 1/2 | 2/3 | 1/3 | 5/6 |
| 85  | 1/3 | 1/3 | 0   | 0   | 2/3 | 2/3 | 2/3 | 1   |
| 86  | 1/3 | 1/6 | 0   | 0   | 2/3 | 5/6 | 2/3 | 1   |
| 87  | 5/6 | 2/3 | 1/3 | 1/6 | 5/6 | 1   | 5/6 | 1   |
| 88  | 5/6 | 0   | 0   | 0   | 2/3 | 5/6 | 2/3 | 1   |
| 89  | 2/3 | 1/6 | 0   | 0   | 2/3 | 1   | 1   | 1   |
| 90  | 1/3 | 1/3 | 1/3 | 1/6 | 2/3 | 5/6 | 2/3 | 5/6 |
| 91  | 1/3 | 1/3 | 1/6 | 1/6 | 2/3 | 1   | 2/3 | 5/6 |
| 92  | 1   | 1   | 1   | 1   | 5/6 | 5/6 | 5/6 | 1   |
| 93  | 1/3 | 1/3 | 1/6 | 1/6 | 2/3 | 5/6 | 5/6 | 5/6 |
| 94  | 1/6 | 1/6 | 0   | 0   | 2/3 | 5/6 | 2/3 | 1   |
| 95  | 1/3 | 1/6 | 1/6 | 1/6 | 2/3 | 5/6 | 2/3 | 5/6 |
| 96  | 5/6 | 2/3 | 5/6 | 2/3 | 1   | 1   | 1   | 1   |
| 97  | 5/6 | 2/3 | 2/3 | 1/6 | 5/6 | 5/6 | 5/6 | 1   |
| 98  | 5/6 | 2/3 | 2/3 | 1/6 | 5/6 | 1   | 5/6 | 1   |
| 99  | 1/6 | 1/6 | 1/6 | 1/6 | 2/3 | 2/3 | 2/3 | 5/6 |
| 100 | 1/3 | 1/3 | 1/6 | 1/6 | 5/6 | 5/6 | 5/6 | 5/6 |
| 101 | 1/3 | 1/3 | 1/6 | 1/6 | 5/6 | 5/6 | 5/6 | 5/6 |
| 102 | 5/6 | 1/3 | 1/3 | 1/6 | 5/6 | 5/6 | 5/6 | 5/6 |
| 103 | 5/6 | 5/6 | 2/3 | 1/3 | 1   | 1   | 5/6 | 1   |
| 104 | 2/3 | 1/3 | 1/3 | 1/6 | 5/6 | 5/6 | 2/3 | 5/6 |
| 105 | 5/6 | 1/3 | 1/6 | 1/6 | 5/6 | 5/6 | 5/6 | 5/6 |
| 106 | 1/3 | 1/6 | 1/6 | 1/6 | 2/3 | 5/6 | 2/3 | 5/6 |
| 107 | 1/3 | 1/6 | 1/6 | 1/6 | 2/3 | 5/6 | 2/3 | 1   |
| 108 | 1/3 | 1/6 | 1/6 | 1/6 | 5/6 | 5/6 | 2/3 | 5/6 |
| 109 | 5/6 | 1/3 | 1/3 | 0   | 5/6 | 5/6 | 5/6 | 1   |
| 110 | 5/6 | 1/6 | 1/6 | 1/6 | 5/6 | 5/6 | 5/6 | 1   |
| 111 | 1/6 | 1/6 | 1/6 | 1/6 | 2/3 | 5/6 | 1/6 | 5/6 |
| 112 | 1/3 | 1/6 | 1/6 | 1/6 | 5/6 | 5/6 | 2/3 | 1   |
| 113 | 0   | 0   | 0   | 0   | 1/6 | 2/3 | 0   | 2/3 |

## Supplementary S4: dEX fractionTable

|     |     |     |     |     |     |     |     |     |
|-----|-----|-----|-----|-----|-----|-----|-----|-----|
| 114 | 1   | 5/6 | 2/3 | 1/3 | 5/6 | 5/6 | 2/3 | 1   |
| 115 | 2/3 | 1/6 | 1/6 | 1/6 | 5/6 | 1   | 2/3 | 5/6 |
| 116 | 5/6 | 1/6 | 2/3 | 1/6 | 5/6 | 1   | 2/3 | 5/6 |
| 117 | 2/3 | 1/3 | 1/6 | 1/6 | 5/6 | 5/6 | 2/3 | 5/6 |
| 118 | 1/6 | 1/6 | 1/6 | 1/6 | 2/3 | 5/6 | 2/3 | 5/6 |
| 119 | 2/3 | 1/3 | 1/3 | 1/6 | 5/6 | 1   | 2/3 | 1   |
| 120 | 2/3 | 1/6 | 1/6 | 1/6 | 5/6 | 1   | 2/3 | 5/6 |
| 121 | 5/6 | 1/6 | 1/6 | 1/6 | 5/6 | 5/6 | 2/3 | 5/6 |
| 122 | 2/3 | 1/6 | 1/3 | 1/3 | 5/6 | 1   | 2/3 | 1   |
| 123 | 5/6 | 1/6 | 5/6 | 1/6 | 5/6 | 5/6 | 2/3 | 1   |
| 124 | 1/3 | 1/6 | 0   | 0   | 5/6 | 5/6 | 2/3 | 5/6 |
| 125 | 1/3 | 0   | 1/6 | 0   | 2/3 | 5/6 | 2/3 | 1   |
| 126 | 1/6 | 0   | 0   | 0   | 2/3 | 2/3 | 1/3 | 5/6 |
| 127 | 5/6 | 1/3 | 1/3 | 2/3 | 5/6 | 5/6 | 2/3 | 1   |
| 128 | 2/3 | 1/6 | 1/6 | 1/6 | 2/3 | 5/6 | 2/3 | 5/6 |
| 129 | 5/6 | 2/3 | 1/3 | 1/6 | 2/3 | 5/6 | 2/3 | 1   |
| 130 | 2/3 | 0   | 1/6 | 0   | 2/3 | 1   | 2/3 | 1   |
| 131 | 2/3 | 1/6 | 1/3 | 1/3 | 2/3 | 5/6 | 2/3 | 1   |
| 132 | 2/3 | 1/6 | 1/3 | 0   | 2/3 | 5/6 | 1/3 | 5/6 |
| 133 | 1/6 | 1/6 | 1/6 | 0   | 2/3 | 2/3 | 0   | 2/3 |
| 134 | 2/3 | 1/3 | 1/3 | 1/6 | 5/6 | 1   | 2/3 | 1   |
| 135 | 5/6 | 1/3 | 5/6 | 1/3 | 5/6 | 5/6 | 2/3 | 1   |
| 136 | 2/3 | 1/6 | 1/6 | 1/6 | 5/6 | 5/6 | 5/6 | 1   |
| 137 | 1/6 | 1/6 | 1/6 | 1/6 | 2/3 | 2/3 | 1/6 | 5/6 |
| 138 | 1/3 | 1/6 | 1/3 | 0   | 2/3 | 2/3 | 1/3 | 5/6 |
| 139 | 2/3 | 1/3 | 1/3 | 1/6 | 5/6 | 5/6 | 2/3 | 1   |
| 140 | 1/6 | 1/6 | 1/6 | 0   | 2/3 | 5/6 | 1/6 | 5/6 |
| 141 | 2/3 | 1/6 | 2/3 | 0   | 5/6 | 5/6 | 2/3 | 1   |
| 142 | 1/6 | 1/6 | 1/3 | 1/6 | 2/3 | 2/3 | 0   | 5/6 |
| 143 | 0   | 5/6 | 1   | 5/6 | 0   | 0   | 0   | 2/3 |
| 144 | 5/6 | 5/6 | 2/3 | 1/3 | 5/6 | 5/6 | 1/3 | 1   |
| 145 | 5/6 | 2/3 | 2/3 | 1/6 | 5/6 | 5/6 | 2/3 | 1   |
| 146 | 2/3 | 2/3 | 1/3 | 1/6 | 1/6 | 5/6 | 2/3 | 1   |
| 147 | 5/6 | 2/3 | 1/3 | 0   | 2/3 | 5/6 | 1/3 | 5/6 |
| 148 | 5/6 | 5/6 | 2/3 | 1/6 | 5/6 | 1   | 2/3 | 1   |
| 149 | 2/3 | 1/6 | 1/6 | 1/3 | 5/6 | 5/6 | 2/3 | 5/6 |
| 150 | 1/2 | 1/2 | 1/2 | 2/3 | 2/3 | 5/6 | 2/3 | 1   |
| 151 | 1/3 | 1/6 | 0   | 0   | 1/2 | 2/3 | 2/3 | 5/6 |
| 152 | 2/3 | 1/2 | 1/2 | 1/3 | 2/3 | 5/6 | 2/3 | 1   |
| 153 | 1   | 1   | 1/3 | 1/2 | 1   | 1   | 1   | 1   |
| 154 | 1   | 2/3 | 1/2 | 1/2 | 5/6 | 1   | 1   | 1   |
| 155 | 1   | 2/3 | 2/3 | 1/3 | 5/6 | 1   | 2/3 | 1   |
| 156 | 2/3 | 1/3 | 1/6 | 0   | 2/3 | 1   | 2/3 | 1   |
| 157 | 1/6 | 1/6 | 0   | 0   | 2/3 | 5/6 | 1/3 | 1   |
| 158 | 1/6 | 1/6 | 0   | 0   | 1/2 | 2/3 | 1/3 | 5/6 |
| 159 | 1/3 | 1/3 | 0   | 0   | 2/3 | 2/3 | 2/3 | 1   |
| 160 | 1/3 | 1/6 | 0   | 0   | 2/3 | 5/6 | 2/3 | 1   |
| 161 | 5/6 | 2/3 | 1/3 | 1/6 | 5/6 | 1   | 5/6 | 1   |

## Supplementary S4: dEX fractionTable

|     |     |     |     |     |     |     |     |     |
|-----|-----|-----|-----|-----|-----|-----|-----|-----|
| 162 | 5/6 | 0   | 0   | 0   | 2/3 | 5/6 | 2/3 | 1   |
| 163 | 2/3 | 1/6 | 0   | 0   | 2/3 | 1   | 1   | 1   |
| 164 | 1/3 | 1/3 | 1/3 | 1/6 | 2/3 | 5/6 | 2/3 | 5/6 |
| 165 | 1/3 | 1/3 | 1/6 | 1/6 | 2/3 | 1   | 2/3 | 5/6 |
| 166 | 1   | 1   | 1   | 1   | 5/6 | 5/6 | 5/6 | 1   |
| 167 | 1/3 | 1/3 | 1/6 | 1/6 | 2/3 | 5/6 | 5/6 | 5/6 |
| 168 | 1/6 | 1/6 | 0   | 0   | 2/3 | 5/6 | 2/3 | 1   |
| 169 | 1/3 | 1/6 | 1/6 | 1/6 | 2/3 | 5/6 | 2/3 | 5/6 |
| 170 | 5/6 | 2/3 | 5/6 | 2/3 | 1   | 1   | 1   | 1   |
| 171 | 5/6 | 2/3 | 2/3 | 1/6 | 5/6 | 5/6 | 5/6 | 1   |
| 172 | 5/6 | 2/3 | 2/3 | 1/6 | 5/6 | 1   | 5/6 | 1   |
| 173 | 1/6 | 1/6 | 1/6 | 1/6 | 2/3 | 2/3 | 2/3 | 5/6 |
| 174 | 1/3 | 1/3 | 1/6 | 1/6 | 5/6 | 5/6 | 5/6 | 5/6 |
| 175 | 1/3 | 1/3 | 1/6 | 1/6 | 5/6 | 5/6 | 5/6 | 5/6 |
| 176 | 5/6 | 1/3 | 1/3 | 1/6 | 5/6 | 5/6 | 5/6 | 5/6 |
| 177 | 5/6 | 5/6 | 2/3 | 1/3 | 1   | 1   | 5/6 | 1   |
| 178 | 2/3 | 1/3 | 1/3 | 1/6 | 5/6 | 5/6 | 2/3 | 5/6 |
| 179 | 5/6 | 1/3 | 1/6 | 1/6 | 5/6 | 5/6 | 5/6 | 5/6 |
| 180 | 1/3 | 1/6 | 1/6 | 1/6 | 2/3 | 5/6 | 2/3 | 5/6 |
| 181 | 1/3 | 1/6 | 1/6 | 1/6 | 2/3 | 5/6 | 2/3 | 1   |
| 182 | 1/3 | 1/6 | 1/6 | 1/6 | 5/6 | 5/6 | 2/3 | 5/6 |
| 183 | 5/6 | 1/3 | 1/3 | 0   | 5/6 | 5/6 | 5/6 | 1   |
| 184 | 5/6 | 1/6 | 1/6 | 1/6 | 5/6 | 5/6 | 5/6 | 1   |
| 185 | 1/6 | 1/6 | 1/6 | 1/6 | 2/3 | 5/6 | 1/6 | 5/6 |
| 186 | 1/3 | 1/6 | 1/6 | 1/6 | 5/6 | 5/6 | 2/3 | 1   |
| 187 | 0   | 0   | 0   | 0   | 1/6 | 2/3 | 0   | 2/3 |
| 188 | 1   | 5/6 | 2/3 | 1/3 | 5/6 | 5/6 | 2/3 | 1   |
| 189 | 2/3 | 1/6 | 1/6 | 1/6 | 5/6 | 1   | 2/3 | 5/6 |
| 190 | 5/6 | 1/6 | 2/3 | 1/6 | 5/6 | 1   | 2/3 | 5/6 |
| 191 | 2/3 | 1/3 | 1/6 | 1/6 | 5/6 | 5/6 | 2/3 | 5/6 |
| 192 | 1/6 | 1/6 | 1/6 | 1/6 | 2/3 | 5/6 | 2/3 | 5/6 |
| 193 | 2/3 | 1/3 | 1/3 | 1/6 | 5/6 | 1   | 2/3 | 1   |
| 194 | 2/3 | 1/6 | 1/6 | 1/6 | 5/6 | 1   | 2/3 | 5/6 |
| 195 | 5/6 | 1/6 | 1/6 | 1/6 | 5/6 | 5/6 | 2/3 | 5/6 |
| 196 | 2/3 | 1/6 | 1/3 | 1/3 | 5/6 | 1   | 2/3 | 1   |
| 197 | 5/6 | 1/6 | 5/6 | 1/6 | 5/6 | 5/6 | 2/3 | 1   |
| 198 | 1/3 | 1/6 | 0   | 0   | 5/6 | 5/6 | 2/3 | 5/6 |
| 199 | 1/3 | 0   | 1/6 | 0   | 2/3 | 5/6 | 2/3 | 1   |
| 200 | 1/6 | 0   | 0   | 0   | 2/3 | 2/3 | 1/3 | 5/6 |
| 201 | 5/6 | 1/3 | 1/3 | 2/3 | 5/6 | 5/6 | 2/3 | 1   |
| 202 | 2/3 | 1/6 | 1/6 | 1/6 | 2/3 | 5/6 | 2/3 | 5/6 |
| 203 | 5/6 | 2/3 | 1/3 | 1/6 | 2/3 | 5/6 | 2/3 | 1   |
| 204 | 2/3 | 0   | 1/6 | 0   | 2/3 | 1   | 2/3 | 1   |
| 205 | 2/3 | 1/6 | 1/3 | 1/3 | 2/3 | 5/6 | 2/3 | 1   |
| 206 | 2/3 | 1/6 | 1/3 | 0   | 2/3 | 5/6 | 1/3 | 5/6 |
| 207 | 1/6 | 1/6 | 1/6 | 0   | 2/3 | 2/3 | 0   | 2/3 |
| 208 | 2/3 | 1/3 | 1/3 | 1/6 | 5/6 | 1   | 2/3 | 1   |
| 209 | 5/6 | 1/3 | 5/6 | 1/3 | 5/6 | 5/6 | 2/3 | 1   |

## Supplementary S4: dEX fractionTable

|     |     |     |     |     |     |     |     |     |
|-----|-----|-----|-----|-----|-----|-----|-----|-----|
| 210 | 2/3 | 1/6 | 1/6 | 1/6 | 5/6 | 5/6 | 5/6 | 1   |
| 211 | 1/6 | 1/6 | 1/6 | 1/6 | 2/3 | 2/3 | 1/6 | 5/6 |
| 212 | 1/3 | 1/6 | 1/3 | 0   | 2/3 | 2/3 | 1/3 | 5/6 |
| 213 | 2/3 | 1/3 | 1/3 | 1/6 | 5/6 | 5/6 | 2/3 | 1   |
| 214 | 1/6 | 1/6 | 1/6 | 0   | 2/3 | 5/6 | 1/6 | 5/6 |
| 215 | 2/3 | 1/6 | 2/3 | 0   | 5/6 | 5/6 | 2/3 | 1   |
| 216 | 1/6 | 1/6 | 1/3 | 1/6 | 2/3 | 2/3 | 0   | 5/6 |

| No. | X(5)Q2 | X(5)Q3 | X(5)Q4 | X(5)Q5 | X(5)Q6 | X(6)Q1 | X(6)Q2 | X(6)Q3 |
|-----|--------|--------|--------|--------|--------|--------|--------|--------|
| 1   | 1      | 1      | 1/3    | 1/6    | 0      | 1/6    | 2/3    | 1/2    |
| 2   | 5/6    | 2/3    | 2/3    | 2/3    | 1/2    | 1/2    | 1/2    | 1/2    |
| 3   | 5/6    | 1/3    | 1/6    | 0      | 0      | 1/6    | 1/6    | 1/3    |
| 4   | 5/6    | 1/2    | 1/3    | 1/3    | 0      | 1/3    | 1/3    | 1/3    |
| 5   | 1      | 1      | 1/3    | 1/6    | 0      | 0      | 1/2    | 1/3    |
| 6   | 1      | 2/3    | 2/3    | 1      | 1/3    | 1/2    | 2/3    | 1/2    |
| 7   | 1      | 5/6    | 2/3    | 5/6    | 0      | 0      | 1/3    | 2/3    |
| 8   | 1      | 2/3    | 0      | 0      | 0      | 0      | 1/3    | 0      |
| 9   | 1      | 5/6    | 1/6    | 0      | 0      | 1/6    | 1/6    | 0      |
| 10  | 5/6    | 1/3    | 1/6    | 0      | 0      | 0      | 0      | 0      |
| 11  | 1      | 5/6    | 0      | 0      | 0      | 0      | 1/3    | 1/3    |
| 12  | 5/6    | 2/3    | 0      | 0      | 0      | 0      | 1/6    | 1/6    |
| 13  | 1      | 5/6    | 1/6    | 1/6    | 0      | 0      | 1/6    | 1/3    |
| 14  | 5/6    | 0      | 0      | 0      | 0      | 0      | 1/3    | 1/6    |
| 15  | 5/6    | 5/6    | 0      | 0      | 0      | 0      | 1/6    | 1/6    |
| 16  | 5/6    | 2/3    | 1/3    | 1/6    | 0      | 0      | 1/6    | 2/3    |
| 17  | 5/6    | 2/3    | 1/6    | 1/6    | 0      | 1/6    | 1/6    | 2/3    |
| 18  | 2/3    | 5/6    | 2/3    | 2/3    | 1/2    | 1/3    | 1/3    | 5/6    |
| 19  | 2/3    | 2/3    | 1/6    | 1/6    | 1/6    | 1/6    | 1/6    | 2/3    |
| 20  | 5/6    | 5/6    | 0      | 0      | 0      | 1/6    | 0      | 1/3    |
| 21  | 5/6    | 2/3    | 1/6    | 1/6    | 0      | 0      | 1/6    | 1/3    |
| 22  | 5/6    | 5/6    | 2/3    | 1/3    | 1/6    | 1/3    | 2/3    | 2/3    |
| 23  | 5/6    | 5/6    | 5/6    | 2/3    | 1/6    | 1/3    | 5/6    | 5/6    |
| 24  | 5/6    | 5/6    | 5/6    | 1/3    | 0      | 1/6    | 2/3    | 2/3    |
| 25  | 5/6    | 2/3    | 1/6    | 1/6    | 0      | 1/6    | 1/6    | 1/6    |
| 26  | 5/6    | 1/3    | 0      | 1/6    | 0      | 1/6    | 1/6    | 1/3    |
| 27  | 5/6    | 2/3    | 1/6    | 1/6    | 0      | 1/6    | 1/3    | 1/6    |
| 28  | 5/6    | 2/3    | 1/6    | 1/6    | 0      | 1/6    | 1/3    | 1/3    |
| 29  | 1      | 5/6    | 1/3    | 1/3    | 1/6    | 1/3    | 5/6    | 5/6    |
| 30  | 5/6    | 2/3    | 1/6    | 1/6    | 0      | 1/3    | 5/6    | 2/3    |
| 31  | 5/6    | 2/3    | 1/6    | 1/6    | 0      | 1/6    | 2/3    | 2/3    |
| 32  | 5/6    | 2/3    | 1/6    | 1/6    | 0      | 1/6    | 1/3    | 1/6    |
| 33  | 5/6    | 2/3    | 1/6    | 1/6    | 0      | 1/6    | 1/3    | 1/6    |
| 34  | 5/6    | 2/3    | 1/6    | 1/6    | 1/6    | 1/3    | 1/3    | 1/6    |
| 35  | 1      | 5/6    | 1/6    | 1/6    | 1/6    | 1/3    | 5/6    | 2/3    |
| 36  | 5/6    | 2/3    | 1/6    | 1/6    | 1/6    | 1/3    | 5/6    | 2/3    |
| 37  | 5/6    | 1/6    | 0      | 0      | 0      | 1/6    | 1/6    | 1/6    |
| 38  | 5/6    | 2/3    | 1/6    | 1/6    | 0      | 1/6    | 1/6    | 1/3    |

## Supplementary S4: dEX fractionTable

|    |     |     |     |     |     |     |     |     |
|----|-----|-----|-----|-----|-----|-----|-----|-----|
| 39 | 1/6 | 1/6 | 0   | 0   | 1/6 | 1/3 | 5/6 | 2/3 |
| 40 | 1   | 5/6 | 1/6 | 1/6 | 1/6 | 1/3 | 5/6 | 5/6 |
| 41 | 5/6 | 2/3 | 1/6 | 1/6 | 0   | 1/6 | 2/3 | 2/3 |
| 42 | 5/6 | 2/3 | 1/6 | 1/6 | 1/6 | 1/6 | 1/3 | 1/3 |
| 43 | 5/6 | 2/3 | 1/6 | 1/6 | 0   | 0   | 2/3 | 1/6 |
| 44 | 2/3 | 1/6 | 1/6 | 1/6 | 0   | 1/6 | 1/6 | 1/6 |
| 45 | 5/6 | 5/6 | 1/6 | 0   | 0   | 1/6 | 2/3 | 2/3 |
| 46 | 2/3 | 2/3 | 1/6 | 1/6 | 0   | 1/6 | 1/3 | 1/6 |
| 47 | 5/6 | 2/3 | 1/6 | 1/6 | 0   | 1/6 | 1/6 | 1/6 |
| 48 | 5/6 | 5/6 | 1/6 | 1/6 | 0   | 1/6 | 2/3 | 2/3 |
| 49 | 5/6 | 2/3 | 1/3 | 1/6 | 0   | 1/6 | 5/6 | 5/6 |
| 50 | 5/6 | 2/3 | 1/6 | 1/6 | 1/6 | 1/6 | 2/3 | 2/3 |
| 51 | 5/6 | 1/3 | 1/6 | 1/6 | 0   | 1/6 | 2/3 | 2/3 |
| 52 | 2/3 | 1/3 | 1/6 | 1/6 | 0   | 1/6 | 1/6 | 1/6 |
| 53 | 5/6 | 2/3 | 1/6 | 1/6 | 1/6 | 1/3 | 2/3 | 2/3 |
| 54 | 2/3 | 2/3 | 1/3 | 1/6 | 0   | 1/3 | 1/3 | 1/6 |
| 55 | 5/6 | 2/3 | 0   | 1/6 | 0   | 1/6 | 1/3 | 1/3 |
| 56 | 5/6 | 2/3 | 0   | 1/6 | 0   | 1/3 | 1/3 | 1/3 |
| 57 | 5/6 | 2/3 | 0   | 0   | 0   | 1/6 | 1/3 | 1/6 |
| 58 | 5/6 | 2/3 | 0   | 1/6 | 0   | 1/6 | 1/6 | 1/6 |
| 59 | 1/6 | 1/6 | 0   | 0   | 0   | 0   | 0   | 1/6 |
| 60 | 5/6 | 5/6 | 1/6 | 0   | 0   | 1/3 | 5/6 | 2/3 |
| 61 | 5/6 | 5/6 | 1/6 | 1/6 | 1/6 | 1/6 | 1/6 | 1/6 |
| 62 | 5/6 | 2/3 | 1/6 | 1/6 | 0   | 1/6 | 1/3 | 1/6 |
| 63 | 5/6 | 1/3 | 1/6 | 1/6 | 0   | 1/6 | 1/6 | 1/6 |
| 64 | 2/3 | 1/3 | 1/6 | 1/6 | 0   | 1/6 | 1/6 | 1/6 |
| 65 | 5/6 | 5/6 | 1/6 | 1/6 | 0   | 1/6 | 2/3 | 2/3 |
| 66 | 5/6 | 1/3 | 1/6 | 1/6 | 0   | 1/6 | 1/6 | 1/6 |
| 67 | 5/6 | 5/6 | 0   | 0   | 0   | 1/6 | 2/3 | 2/3 |
| 68 | 2/3 | 1/3 | 1/6 | 1/6 | 0   | 1/6 | 1/6 | 1/6 |
| 69 | 1/3 | 0   | 1   | 5/6 | 1/3 | 2/3 | 1   | 1   |
| 70 | 5/6 | 2/3 | 1/6 | 1/6 | 0   | 1/3 | 2/3 | 2/3 |
| 71 | 5/6 | 2/3 | 1/6 | 1/6 | 0   | 1/3 | 2/3 | 5/6 |
| 72 | 5/6 | 2/3 | 1/6 | 1/6 | 0   | 1/3 | 2/3 | 2/3 |
| 73 | 2/3 | 2/3 | 1/6 | 1/6 | 0   | 1/3 | 2/3 | 2/3 |
| 74 | 5/6 | 1/3 | 1/6 | 1/6 | 0   | 1/6 | 5/6 | 5/6 |
| 75 | 1   | 1   | 1/3 | 1/6 | 0   | 1/6 | 2/3 | 1/2 |
| 76 | 5/6 | 2/3 | 2/3 | 2/3 | 1/2 | 1/2 | 1/2 | 1/2 |
| 77 | 5/6 | 1/3 | 1/6 | 0   | 0   | 1/6 | 1/6 | 1/3 |
| 78 | 5/6 | 1/2 | 1/3 | 1/3 | 0   | 1/3 | 1/3 | 1/3 |
| 79 | 1   | 1   | 1/3 | 1/6 | 0   | 0   | 1/2 | 1/3 |
| 80 | 1   | 2/3 | 2/3 | 1   | 1/3 | 1/2 | 2/3 | 1/2 |
| 81 | 1   | 5/6 | 2/3 | 5/6 | 0   | 0   | 1/3 | 2/3 |
| 82 | 1   | 2/3 | 0   | 0   | 0   | 0   | 1/3 | 0   |
| 83 | 1   | 5/6 | 1/6 | 0   | 0   | 1/6 | 1/6 | 0   |
| 84 | 5/6 | 1/3 | 1/6 | 0   | 0   | 0   | 0   | 0   |
| 85 | 1   | 5/6 | 0   | 0   | 0   | 0   | 1/3 | 1/3 |
| 86 | 5/6 | 2/3 | 0   | 0   | 0   | 0   | 1/6 | 1/6 |



## Supplementary S4: dEX fractionTable

|     |     |     |     |     |     |     |     |     |
|-----|-----|-----|-----|-----|-----|-----|-----|-----|
| 87  | 1   | 5/6 | 1/6 | 1/6 | 0   | 0   | 1/6 | 1/3 |
| 88  | 5/6 | 0   | 0   | 0   | 0   | 0   | 1/3 | 1/6 |
| 89  | 5/6 | 5/6 | 0   | 0   | 0   | 0   | 1/6 | 1/6 |
| 90  | 5/6 | 2/3 | 1/3 | 1/6 | 0   | 0   | 1/6 | 2/3 |
| 91  | 5/6 | 2/3 | 1/6 | 1/6 | 0   | 1/6 | 1/6 | 2/3 |
| 92  | 2/3 | 5/6 | 2/3 | 2/3 | 1/2 | 1/3 | 1/3 | 5/6 |
| 93  | 2/3 | 2/3 | 1/6 | 1/6 | 1/6 | 1/6 | 1/6 | 2/3 |
| 94  | 5/6 | 5/6 | 0   | 0   | 0   | 1/6 | 0   | 1/3 |
| 95  | 5/6 | 2/3 | 1/6 | 1/6 | 0   | 0   | 1/6 | 1/3 |
| 96  | 5/6 | 5/6 | 2/3 | 1/3 | 1/6 | 1/3 | 2/3 | 2/3 |
| 97  | 5/6 | 5/6 | 5/6 | 2/3 | 1/6 | 1/3 | 5/6 | 5/6 |
| 98  | 5/6 | 5/6 | 5/6 | 1/3 | 0   | 1/6 | 2/3 | 2/3 |
| 99  | 5/6 | 2/3 | 1/6 | 1/6 | 0   | 1/6 | 1/6 | 1/6 |
| 100 | 5/6 | 1/3 | 0   | 1/6 | 0   | 1/6 | 1/6 | 1/3 |
| 101 | 5/6 | 2/3 | 1/6 | 1/6 | 0   | 1/6 | 1/3 | 1/6 |
| 102 | 5/6 | 2/3 | 1/6 | 1/6 | 0   | 1/6 | 1/3 | 1/3 |
| 103 | 1   | 5/6 | 1/3 | 1/3 | 1/6 | 1/3 | 5/6 | 5/6 |
| 104 | 5/6 | 2/3 | 1/6 | 1/6 | 0   | 1/3 | 5/6 | 2/3 |
| 105 | 5/6 | 2/3 | 1/6 | 1/6 | 0   | 1/6 | 2/3 | 2/3 |
| 106 | 5/6 | 2/3 | 1/6 | 1/6 | 0   | 1/6 | 1/3 | 1/6 |
| 107 | 5/6 | 2/3 | 1/6 | 1/6 | 0   | 1/6 | 1/3 | 1/6 |
| 108 | 5/6 | 2/3 | 1/6 | 1/6 | 1/6 | 1/3 | 1/3 | 1/6 |
| 109 | 1   | 5/6 | 1/6 | 1/6 | 1/6 | 1/3 | 5/6 | 2/3 |
| 110 | 5/6 | 2/3 | 1/6 | 1/6 | 1/6 | 1/3 | 5/6 | 2/3 |
| 111 | 5/6 | 1/6 | 0   | 0   | 0   | 1/6 | 1/6 | 1/6 |
| 112 | 5/6 | 2/3 | 1/6 | 1/6 | 0   | 1/6 | 1/6 | 1/3 |
| 113 | 1/6 | 1/6 | 0   | 0   | 1/6 | 1/3 | 5/6 | 2/3 |
| 114 | 1   | 5/6 | 1/6 | 1/6 | 1/6 | 1/3 | 5/6 | 5/6 |
| 115 | 5/6 | 2/3 | 1/6 | 1/6 | 0   | 1/6 | 2/3 | 2/3 |
| 116 | 5/6 | 2/3 | 1/6 | 1/6 | 1/6 | 1/6 | 1/3 | 1/3 |
| 117 | 5/6 | 2/3 | 1/6 | 1/6 | 0   | 0   | 2/3 | 1/6 |
| 118 | 2/3 | 1/6 | 1/6 | 1/6 | 0   | 1/6 | 1/6 | 1/6 |
| 119 | 5/6 | 5/6 | 1/6 | 0   | 0   | 1/6 | 2/3 | 2/3 |
| 120 | 2/3 | 2/3 | 1/6 | 1/6 | 0   | 1/6 | 1/3 | 1/6 |
| 121 | 5/6 | 2/3 | 1/6 | 1/6 | 0   | 1/6 | 1/6 | 1/6 |
| 122 | 5/6 | 5/6 | 1/6 | 1/6 | 0   | 1/6 | 2/3 | 2/3 |
| 123 | 5/6 | 2/3 | 1/3 | 1/6 | 0   | 1/6 | 5/6 | 5/6 |
| 124 | 5/6 | 2/3 | 1/6 | 1/6 | 1/6 | 1/6 | 2/3 | 2/3 |
| 125 | 5/6 | 1/3 | 1/6 | 1/6 | 0   | 1/6 | 2/3 | 2/3 |
| 126 | 2/3 | 1/3 | 1/6 | 1/6 | 0   | 1/6 | 1/6 | 1/6 |
| 127 | 5/6 | 2/3 | 1/6 | 1/6 | 1/6 | 1/3 | 2/3 | 2/3 |
| 128 | 2/3 | 2/3 | 1/3 | 1/6 | 0   | 1/3 | 1/3 | 1/6 |
| 129 | 5/6 | 2/3 | 0   | 1/6 | 0   | 1/6 | 1/3 | 1/3 |
| 130 | 5/6 | 2/3 | 0   | 1/6 | 0   | 1/3 | 1/3 | 1/3 |
| 131 | 5/6 | 2/3 | 0   | 0   | 0   | 1/6 | 1/3 | 1/6 |
| 132 | 5/6 | 2/3 | 0   | 1/6 | 0   | 1/6 | 1/6 | 1/6 |
| 133 | 1/6 | 1/6 | 0   | 0   | 0   | 0   | 0   | 1/6 |
| 134 | 5/6 | 5/6 | 1/6 | 0   | 0   | 1/3 | 5/6 | 2/3 |

Supplementary S4: dEX fractionTable

|     |     |     |     |     |     |     |     |     |
|-----|-----|-----|-----|-----|-----|-----|-----|-----|
| 135 | 5/6 | 5/6 | 1/6 | 1/6 | 1/6 | 1/6 | 1/6 | 1/6 |
| 136 | 5/6 | 2/3 | 1/6 | 1/6 | 0   | 1/6 | 1/3 | 1/6 |
| 137 | 5/6 | 1/3 | 1/6 | 1/6 | 0   | 1/6 | 1/6 | 1/6 |
| 138 | 2/3 | 1/3 | 1/6 | 1/6 | 0   | 1/6 | 1/6 | 1/6 |
| 139 | 5/6 | 5/6 | 1/6 | 1/6 | 0   | 1/6 | 2/3 | 2/3 |
| 140 | 5/6 | 1/3 | 1/6 | 1/6 | 0   | 1/6 | 1/6 | 1/6 |
| 141 | 5/6 | 5/6 | 0   | 0   | 0   | 1/6 | 2/3 | 2/3 |
| 142 | 2/3 | 1/3 | 1/6 | 1/6 | 0   | 1/6 | 1/6 | 1/6 |
| 143 | 1/3 | 0   | 1   | 5/6 | 1/3 | 2/3 | 1   | 1   |
| 144 | 5/6 | 2/3 | 1/6 | 1/6 | 0   | 1/3 | 2/3 | 2/3 |
| 145 | 5/6 | 2/3 | 1/6 | 1/6 | 0   | 1/3 | 2/3 | 5/6 |
| 146 | 5/6 | 2/3 | 1/6 | 1/6 | 0   | 1/3 | 2/3 | 2/3 |
| 147 | 2/3 | 2/3 | 1/6 | 1/6 | 0   | 1/3 | 2/3 | 2/3 |
| 148 | 5/6 | 1/3 | 1/6 | 1/6 | 0   | 1/6 | 5/6 | 5/6 |
| 149 | 1   | 1   | 1/3 | 1/6 | 0   | 1/6 | 2/3 | 1/2 |
| 150 | 5/6 | 2/3 | 2/3 | 2/3 | 1/2 | 1/2 | 1/2 | 1/2 |
| 151 | 5/6 | 1/3 | 1/6 | 0   | 0   | 1/6 | 1/6 | 1/3 |
| 152 | 5/6 | 1/2 | 1/3 | 1/3 | 0   | 1/3 | 1/3 | 1/3 |
| 153 | 1   | 1   | 1/3 | 1/6 | 0   | 0   | 1/2 | 1/3 |
| 154 | 1   | 2/3 | 2/3 | 1   | 1/3 | 1/2 | 2/3 | 1/2 |
| 155 | 1   | 5/6 | 2/3 | 5/6 | 0   | 0   | 1/3 | 2/3 |
| 156 | 1   | 2/3 | 0   | 0   | 0   | 0   | 1/3 | 0   |
| 157 | 1   | 5/6 | 1/6 | 0   | 0   | 1/6 | 1/6 | 0   |
| 158 | 5/6 | 1/3 | 1/6 | 0   | 0   | 0   | 0   | 0   |
| 159 | 1   | 5/6 | 0   | 0   | 0   | 0   | 1/3 | 1/3 |
| 160 | 5/6 | 2/3 | 0   | 0   | 0   | 0   | 1/6 | 1/6 |
| 161 | 1   | 5/6 | 1/6 | 1/6 | 0   | 0   | 1/6 | 1/3 |
| 162 | 5/6 | 0   | 0   | 0   | 0   | 0   | 1/3 | 1/6 |
| 163 | 5/6 | 5/6 | 0   | 0   | 0   | 0   | 1/6 | 1/6 |
| 164 | 5/6 | 2/3 | 1/3 | 1/6 | 0   | 0   | 1/6 | 2/3 |
| 165 | 5/6 | 2/3 | 1/6 | 1/6 | 0   | 1/6 | 1/6 | 2/3 |
| 166 | 2/3 | 5/6 | 2/3 | 2/3 | 1/2 | 1/3 | 1/3 | 5/6 |
| 167 | 2/3 | 2/3 | 1/6 | 1/6 | 1/6 | 1/6 | 1/6 | 2/3 |
| 168 | 5/6 | 5/6 | 0   | 0   | 0   | 1/6 | 0   | 1/3 |
| 169 | 5/6 | 2/3 | 1/6 | 1/6 | 0   | 0   | 1/6 | 1/3 |
| 170 | 5/6 | 5/6 | 2/3 | 1/3 | 1/6 | 1/3 | 2/3 | 2/3 |
| 171 | 5/6 | 5/6 | 5/6 | 2/3 | 1/6 | 1/3 | 5/6 | 5/6 |
| 172 | 5/6 | 5/6 | 5/6 | 1/3 | 0   | 1/6 | 2/3 | 2/3 |
| 173 | 5/6 | 2/3 | 1/6 | 1/6 | 0   | 1/6 | 1/6 | 1/6 |
| 174 | 5/6 | 1/3 | 0   | 1/6 | 0   | 1/6 | 1/6 | 1/3 |
| 175 | 5/6 | 2/3 | 1/6 | 1/6 | 0   | 1/6 | 1/3 | 1/6 |
| 176 | 5/6 | 2/3 | 1/6 | 1/6 | 0   | 1/6 | 1/3 | 1/3 |
| 177 | 1   | 5/6 | 1/3 | 1/3 | 1/6 | 1/3 | 5/6 | 5/6 |
| 178 | 5/6 | 2/3 | 1/6 | 1/6 | 0   | 1/3 | 5/6 | 2/3 |
| 179 | 5/6 | 2/3 | 1/6 | 1/6 | 0   | 1/6 | 2/3 | 2/3 |
| 180 | 5/6 | 2/3 | 1/6 | 1/6 | 0   | 1/6 | 1/3 | 1/6 |
| 181 | 5/6 | 2/3 | 1/6 | 1/6 | 0   | 1/6 | 1/3 | 1/6 |
| 182 | 5/6 | 2/3 | 1/6 | 1/6 | 1/6 | 1/3 | 1/3 | 1/6 |

## Supplementary S4: dEX fractionTable

| 183 | 1      | 5/6    | 1/6    | 1/6    | 1/6    | 1/3    | 5/6     | 2/3    |
|-----|--------|--------|--------|--------|--------|--------|---------|--------|
| 184 | 5/6    | 2/3    | 1/6    | 1/6    | 1/6    | 1/3    | 5/6     | 2/3    |
| 185 | 5/6    | 1/6    | 0      | 0      | 0      | 1/6    | 1/6     | 1/6    |
| 186 | 5/6    | 2/3    | 1/6    | 1/6    | 0      | 1/6    | 1/6     | 1/3    |
| 187 | 1/6    | 1/6    | 0      | 0      | 1/6    | 1/3    | 5/6     | 2/3    |
| 188 | 1      | 5/6    | 1/6    | 1/6    | 1/6    | 1/3    | 5/6     | 5/6    |
| 189 | 5/6    | 2/3    | 1/6    | 1/6    | 0      | 1/6    | 2/3     | 2/3    |
| 190 | 5/6    | 2/3    | 1/6    | 1/6    | 1/6    | 1/6    | 1/3     | 1/3    |
| 191 | 5/6    | 2/3    | 1/6    | 1/6    | 0      | 0      | 2/3     | 1/6    |
| 192 | 2/3    | 1/6    | 1/6    | 1/6    | 0      | 1/6    | 1/6     | 1/6    |
| 193 | 5/6    | 5/6    | 1/6    | 0      | 0      | 1/6    | 2/3     | 2/3    |
| 194 | 2/3    | 2/3    | 1/6    | 1/6    | 0      | 1/6    | 1/3     | 1/6    |
| 195 | 5/6    | 2/3    | 1/6    | 1/6    | 0      | 1/6    | 1/6     | 1/6    |
| 196 | 5/6    | 5/6    | 1/6    | 1/6    | 0      | 1/6    | 2/3     | 2/3    |
| 197 | 5/6    | 2/3    | 1/3    | 1/6    | 0      | 1/6    | 5/6     | 5/6    |
| 198 | 5/6    | 2/3    | 1/6    | 1/6    | 1/6    | 1/6    | 2/3     | 2/3    |
| 199 | 5/6    | 1/3    | 1/6    | 1/6    | 0      | 1/6    | 2/3     | 2/3    |
| 200 | 2/3    | 1/3    | 1/6    | 1/6    | 0      | 1/6    | 1/6     | 1/6    |
| 201 | 5/6    | 2/3    | 1/6    | 1/6    | 1/6    | 1/3    | 2/3     | 2/3    |
| 202 | 2/3    | 2/3    | 1/3    | 1/6    | 0      | 1/3    | 1/3     | 1/6    |
| 203 | 5/6    | 2/3    | 0      | 1/6    | 0      | 1/6    | 1/3     | 1/3    |
| 204 | 5/6    | 2/3    | 0      | 1/6    | 0      | 1/3    | 1/3     | 1/3    |
| 205 | 5/6    | 2/3    | 0      | 0      | 0      | 1/6    | 1/3     | 1/6    |
| 206 | 5/6    | 2/3    | 0      | 1/6    | 0      | 1/6    | 1/6     | 1/6    |
| 207 | 1/6    | 1/6    | 0      | 0      | 0      | 0      | 0       | 1/6    |
| 208 | 5/6    | 5/6    | 1/6    | 0      | 0      | 1/3    | 5/6     | 2/3    |
| 209 | 5/6    | 5/6    | 1/6    | 1/6    | 1/6    | 1/6    | 1/6     | 1/6    |
| 210 | 5/6    | 2/3    | 1/6    | 1/6    | 0      | 1/6    | 1/3     | 1/6    |
| 211 | 5/6    | 1/3    | 1/6    | 1/6    | 0      | 1/6    | 1/6     | 1/6    |
| 212 | 2/3    | 1/3    | 1/6    | 1/6    | 0      | 1/6    | 1/6     | 1/6    |
| 213 | 5/6    | 5/6    | 1/6    | 1/6    | 0      | 1/6    | 2/3     | 2/3    |
| 214 | 5/6    | 1/3    | 1/6    | 1/6    | 0      | 1/6    | 1/6     | 1/6    |
| 215 | 5/6    | 5/6    | 0      | 0      | 0      | 1/6    | 2/3     | 2/3    |
| 216 | 2/3    | 1/3    | 1/6    | 1/6    | 0      | 1/6    | 1/6     | 1/6    |
| No. | X(6)Q4 | X(6)Q5 | X(6)Q6 | X(6)Q7 | X(6)Q8 | X(6)Q9 | X(6)Q10 | X(7)Q1 |
| 1   | 1      | 1      | 1      | 5/6    | 2/3    | 2/3    | 0       | 2/3    |
| 2   | 1/2    | 5/6    | 5/6    | 5/6    | 1/2    | 2/3    | 1/2     | 2/3    |
| 3   | 2/3    | 5/6    | 2/3    | 5/6    | 1/2    | 2/3    | 0       | 1/6    |
| 4   | 1/2    | 2/3    | 2/3    | 2/3    | 2/3    | 2/3    | 1/6     | 2/3    |
| 5   | 1      | 1      | 1      | 1      | 1      | 1      | 1/2     | 1      |
| 6   | 1      | 2/3    | 1      | 1      | 2/3    | 2/3    | 1/3     | 5/6    |
| 7   | 5/6    | 5/6    | 2/3    | 1      | 1      | 1      | 0       | 1/2    |
| 8   | 5/6    | 1      | 5/6    | 5/6    | 1      | 5/6    | 0       | 2/3    |
| 9   | 5/6    | 5/6    | 2/3    | 2/3    | 5/6    | 1/3    | 0       | 1/6    |
| 10  | 2/3    | 2/3    | 2/3    | 2/3    | 1/3    | 1/2    | 0       | 1/6    |

## Supplementary S4: dEX fractionTable

|    |     |     |     |     |     |     |     |     |
|----|-----|-----|-----|-----|-----|-----|-----|-----|
| 11 | 5/6 | 5/6 | 5/6 | 5/6 | 5/6 | 1/3 | 0   | 5/6 |
| 12 | 5/6 | 5/6 | 2/3 | 2/3 | 5/6 | 1/3 | 0   | 1/6 |
| 13 | 5/6 | 5/6 | 2/3 | 2/3 | 1   | 5/6 | 0   | 1/2 |
| 14 | 5/6 | 5/6 | 5/6 | 1/3 | 5/6 | 1/6 | 0   | 2/3 |
| 15 | 5/6 | 1   | 2/3 | 2/3 | 1   | 1/6 | 0   | 2/3 |
| 16 | 5/6 | 5/6 | 5/6 | 2/3 | 2/3 | 2/3 | 0   | 1/2 |
| 17 | 5/6 | 5/6 | 1/3 | 1/3 | 5/6 | 1/6 | 0   | 2/3 |
| 18 | 5/6 | 1   | 1   | 1   | 1/2 | 1   | 2/3 | 1   |
| 19 | 2/3 | 2/3 | 1/6 | 1/6 | 2/3 | 1/6 | 0   | 2/3 |
| 20 | 2/3 | 5/6 | 5/6 | 2/3 | 5/6 | 1/6 | 0   | 2/3 |
| 21 | 5/6 | 2/3 | 1/3 | 1/3 | 5/6 | 1/6 | 0   | 2/3 |
| 22 | 1   | 1   | 5/6 | 5/6 | 1   | 1/3 | 1/6 | 2/3 |
| 23 | 5/6 | 5/6 | 5/6 | 2/3 | 1   | 5/6 | 1/3 | 2/3 |
| 24 | 5/6 | 5/6 | 5/6 | 5/6 | 5/6 | 2/3 | 1/6 | 2/3 |
| 25 | 2/3 | 5/6 | 2/3 | 2/3 | 5/6 | 1/6 | 0   | 2/3 |
| 26 | 2/3 | 5/6 | 5/6 | 2/3 | 2/3 | 1/6 | 0   | 2/3 |
| 27 | 5/6 | 5/6 | 5/6 | 1/3 | 5/6 | 1/6 | 0   | 2/3 |
| 28 | 5/6 | 5/6 | 5/6 | 1/3 | 5/6 | 1/6 | 0   | 2/3 |
| 29 | 5/6 | 5/6 | 5/6 | 2/3 | 5/6 | 5/6 | 1/6 | 5/6 |
| 30 | 5/6 | 5/6 | 5/6 | 2/3 | 5/6 | 1/3 | 0   | 5/6 |
| 31 | 5/6 | 5/6 | 5/6 | 2/3 | 5/6 | 5/6 | 1/6 | 5/6 |
| 32 | 5/6 | 5/6 | 5/6 | 1/3 | 2/3 | 1/6 | 0   | 2/3 |
| 33 | 5/6 | 1   | 5/6 | 2/3 | 5/6 | 1/3 | 1/6 | 2/3 |
| 34 | 2/3 | 5/6 | 2/3 | 2/3 | 2/3 | 1/6 | 1/6 | 5/6 |
| 35 | 5/6 | 5/6 | 5/6 | 2/3 | 5/6 | 2/3 | 1/6 | 5/6 |
| 36 | 5/6 | 5/6 | 5/6 | 5/6 | 5/6 | 1/3 | 1/6 | 5/6 |
| 37 | 5/6 | 5/6 | 5/6 | 5/6 | 2/3 | 1/6 | 0   | 1/2 |
| 38 | 1   | 1   | 5/6 | 5/6 | 2/3 | 1/6 | 1/6 | 2/3 |
| 39 | 2/3 | 1/3 | 2/3 | 1/3 | 2/3 | 5/6 | 1/6 | 1/3 |
| 40 | 5/6 | 5/6 | 5/6 | 5/6 | 5/6 | 2/3 | 1/6 | 5/6 |
| 41 | 5/6 | 5/6 | 5/6 | 2/3 | 2/3 | 2/3 | 1/6 | 2/3 |
| 42 | 5/6 | 5/6 | 2/3 | 2/3 | 2/3 | 2/3 | 0   | 2/3 |
| 43 | 1   | 1   | 2/3 | 2/3 | 5/6 | 1/3 | 0   | 2/3 |
| 44 | 2/3 | 2/3 | 2/3 | 2/3 | 2/3 | 1/6 | 1/6 | 1/2 |
| 45 | 1   | 1   | 5/6 | 2/3 | 5/6 | 2/3 | 0   | 5/6 |
| 46 | 5/6 | 5/6 | 2/3 | 2/3 | 2/3 | 1/6 | 0   | 2/3 |
| 47 | 5/6 | 5/6 | 2/3 | 1/3 | 2/3 | 2/3 | 1/6 | 2/3 |
| 48 | 5/6 | 5/6 | 5/6 | 5/6 | 5/6 | 2/3 | 1/6 | 5/6 |
| 49 | 1   | 5/6 | 5/6 | 5/6 | 5/6 | 5/6 | 0   | 5/6 |
| 50 | 5/6 | 5/6 | 5/6 | 1/3 | 2/3 | 2/3 | 1/6 | 2/3 |
| 51 | 5/6 | 5/6 | 5/6 | 5/6 | 5/6 | 5/6 | 0   | 2/3 |
| 52 | 2/3 | 5/6 | 5/6 | 5/6 | 2/3 | 1/6 | 0   | 1/2 |
| 53 | 5/6 | 5/6 | 5/6 | 2/3 | 2/3 | 2/3 | 1/6 | 5/6 |
| 54 | 5/6 | 5/6 | 2/3 | 2/3 | 1/3 | 2/3 | 1/3 | 2/3 |
| 55 | 5/6 | 5/6 | 5/6 | 2/3 | 1/2 | 1/3 | 1/6 | 2/3 |
| 56 | 2/3 | 5/6 | 2/3 | 2/3 | 2/3 | 1/3 | 0   | 2/3 |
| 57 | 2/3 | 5/6 | 5/6 | 2/3 | 2/3 | 1/6 | 0   | 2/3 |
| 58 | 5/6 | 5/6 | 5/6 | 2/3 | 5/6 | 1/6 | 0   | 5/6 |

## Supplementary S4: dEX fractionTable

|     |     |     |     |     |     |     |     |     |
|-----|-----|-----|-----|-----|-----|-----|-----|-----|
| 59  | 2/3 | 2/3 | 2/3 | 2/3 | 0   | 0   | 0   | 1/6 |
| 60  | 5/6 | 5/6 | 5/6 | 5/6 | 2/3 | 2/3 | 1/6 | 5/6 |
| 61  | 5/6 | 5/6 | 5/6 | 2/3 | 5/6 | 1/6 | 1/6 | 2/3 |
| 62  | 5/6 | 1   | 1   | 2/3 | 5/6 | 1/3 | 0   | 2/3 |
| 63  | 5/6 | 2/3 | 2/3 | 2/3 | 1/3 | 1/6 | 1/6 | 1/6 |
| 64  | 5/6 | 5/6 | 2/3 | 2/3 | 2/3 | 1/6 | 1/6 | 1/3 |
| 65  | 5/6 | 1   | 5/6 | 1/3 | 5/6 | 2/3 | 0   | 2/3 |
| 66  | 2/3 | 5/6 | 2/3 | 2/3 | 1/3 | 1/6 | 0   | 2/3 |
| 67  | 5/6 | 5/6 | 5/6 | 1/6 | 5/6 | 2/3 | 1/6 | 5/6 |
| 68  | 2/3 | 2/3 | 2/3 | 1/3 | 2/3 | 1/6 | 0   | 2/3 |
| 69  | 1   | 1/3 | 1/3 | 1/3 | 1/6 | 5/6 | 1/6 | 1   |
| 70  | 1   | 5/6 | 5/6 | 5/6 | 2/3 | 5/6 | 0   | 2/3 |
| 71  | 1   | 5/6 | 5/6 | 5/6 | 2/3 | 5/6 | 1/6 | 2/3 |
| 72  | 5/6 | 1   | 5/6 | 5/6 | 2/3 | 5/6 | 0   | 2/3 |
| 73  | 1   | 1   | 2/3 | 1/6 | 5/6 | 2/3 | 1/6 | 1/3 |
| 74  | 5/6 | 5/6 | 5/6 | 1/6 | 2/3 | 2/3 | 1/6 | 1/3 |
| 75  | 1   | 1   | 1   | 5/6 | 2/3 | 2/3 | 0   | 2/3 |
| 76  | 1/2 | 5/6 | 5/6 | 5/6 | 1/2 | 2/3 | 1/2 | 2/3 |
| 77  | 2/3 | 5/6 | 2/3 | 5/6 | 1/2 | 2/3 | 0   | 1/6 |
| 78  | 1/2 | 2/3 | 2/3 | 2/3 | 2/3 | 2/3 | 1/6 | 2/3 |
| 79  | 1   | 1   | 1   | 1   | 1   | 1   | 1/2 | 1   |
| 80  | 1   | 2/3 | 1   | 1   | 2/3 | 2/3 | 1/3 | 5/6 |
| 81  | 5/6 | 5/6 | 2/3 | 1   | 1   | 1   | 0   | 1/2 |
| 82  | 5/6 | 1   | 5/6 | 5/6 | 1   | 5/6 | 0   | 2/3 |
| 83  | 5/6 | 5/6 | 2/3 | 2/3 | 5/6 | 1/3 | 0   | 1/6 |
| 84  | 2/3 | 2/3 | 2/3 | 2/3 | 1/3 | 1/2 | 0   | 1/6 |
| 85  | 5/6 | 5/6 | 5/6 | 5/6 | 5/6 | 1/3 | 0   | 5/6 |
| 86  | 5/6 | 5/6 | 2/3 | 2/3 | 5/6 | 1/3 | 0   | 1/6 |
| 87  | 5/6 | 5/6 | 2/3 | 2/3 | 1   | 5/6 | 0   | 1/2 |
| 88  | 5/6 | 5/6 | 5/6 | 1/3 | 5/6 | 1/6 | 0   | 2/3 |
| 89  | 5/6 | 1   | 2/3 | 2/3 | 1   | 1/6 | 0   | 2/3 |
| 90  | 5/6 | 5/6 | 5/6 | 2/3 | 2/3 | 2/3 | 0   | 1/2 |
| 91  | 5/6 | 5/6 | 1/3 | 1/3 | 5/6 | 1/6 | 0   | 2/3 |
| 92  | 5/6 | 1   | 1   | 1   | 1/2 | 1   | 2/3 | 1   |
| 93  | 2/3 | 2/3 | 1/6 | 1/6 | 2/3 | 1/6 | 0   | 2/3 |
| 94  | 2/3 | 5/6 | 5/6 | 2/3 | 5/6 | 1/6 | 0   | 2/3 |
| 95  | 5/6 | 2/3 | 1/3 | 1/3 | 5/6 | 1/6 | 0   | 2/3 |
| 96  | 1   | 1   | 5/6 | 5/6 | 1   | 1/3 | 1/6 | 2/3 |
| 97  | 5/6 | 5/6 | 5/6 | 2/3 | 1   | 5/6 | 1/3 | 2/3 |
| 98  | 5/6 | 5/6 | 5/6 | 5/6 | 5/6 | 2/3 | 1/6 | 2/3 |
| 99  | 2/3 | 5/6 | 2/3 | 2/3 | 5/6 | 1/6 | 0   | 2/3 |
| 100 | 2/3 | 5/6 | 5/6 | 2/3 | 2/3 | 1/6 | 0   | 2/3 |
| 101 | 5/6 | 5/6 | 5/6 | 1/3 | 5/6 | 1/6 | 0   | 2/3 |
| 102 | 5/6 | 5/6 | 5/6 | 1/3 | 5/6 | 1/6 | 0   | 2/3 |
| 103 | 5/6 | 5/6 | 5/6 | 2/3 | 5/6 | 5/6 | 1/6 | 5/6 |
| 104 | 5/6 | 5/6 | 5/6 | 2/3 | 5/6 | 1/3 | 0   | 5/6 |
| 105 | 5/6 | 5/6 | 5/6 | 2/3 | 5/6 | 5/6 | 1/6 | 5/6 |
| 106 | 5/6 | 5/6 | 5/6 | 1/3 | 2/3 | 1/6 | 0   | 2/3 |

## Supplementary S4: dEX fractionTable

|     |     |     |     |     |     |     |     |     |
|-----|-----|-----|-----|-----|-----|-----|-----|-----|
| 107 | 5/6 | 1   | 5/6 | 2/3 | 5/6 | 1/3 | 1/6 | 2/3 |
| 108 | 2/3 | 5/6 | 2/3 | 2/3 | 2/3 | 1/6 | 1/6 | 5/6 |
| 109 | 5/6 | 5/6 | 5/6 | 2/3 | 5/6 | 2/3 | 1/6 | 5/6 |
| 110 | 5/6 | 5/6 | 5/6 | 5/6 | 5/6 | 1/3 | 1/6 | 5/6 |
| 111 | 5/6 | 5/6 | 5/6 | 5/6 | 2/3 | 1/6 | 0   | 1/2 |
| 112 | 1   | 1   | 5/6 | 5/6 | 2/3 | 1/6 | 1/6 | 2/3 |
| 113 | 2/3 | 1/3 | 2/3 | 1/3 | 2/3 | 5/6 | 1/6 | 1/3 |
| 114 | 5/6 | 5/6 | 5/6 | 5/6 | 5/6 | 2/3 | 1/6 | 5/6 |
| 115 | 5/6 | 5/6 | 5/6 | 2/3 | 2/3 | 2/3 | 1/6 | 2/3 |
| 116 | 5/6 | 5/6 | 2/3 | 2/3 | 2/3 | 2/3 | 0   | 2/3 |
| 117 | 1   | 1   | 2/3 | 2/3 | 5/6 | 1/3 | 0   | 2/3 |
| 118 | 2/3 | 2/3 | 2/3 | 2/3 | 2/3 | 1/6 | 1/6 | 1/2 |
| 119 | 1   | 1   | 5/6 | 2/3 | 5/6 | 2/3 | 0   | 5/6 |
| 120 | 5/6 | 5/6 | 2/3 | 2/3 | 2/3 | 1/6 | 0   | 2/3 |
| 121 | 5/6 | 5/6 | 2/3 | 1/3 | 2/3 | 2/3 | 1/6 | 2/3 |
| 122 | 5/6 | 5/6 | 5/6 | 5/6 | 5/6 | 2/3 | 1/6 | 5/6 |
| 123 | 1   | 5/6 | 5/6 | 5/6 | 5/6 | 5/6 | 0   | 5/6 |
| 124 | 5/6 | 5/6 | 5/6 | 1/3 | 2/3 | 2/3 | 1/6 | 2/3 |
| 125 | 5/6 | 5/6 | 5/6 | 5/6 | 5/6 | 5/6 | 0   | 2/3 |
| 126 | 2/3 | 5/6 | 5/6 | 5/6 | 2/3 | 1/6 | 0   | 1/2 |
| 127 | 5/6 | 5/6 | 5/6 | 2/3 | 2/3 | 2/3 | 1/6 | 5/6 |
| 128 | 5/6 | 5/6 | 2/3 | 2/3 | 1/3 | 2/3 | 1/3 | 2/3 |
| 129 | 5/6 | 5/6 | 5/6 | 2/3 | 1/2 | 1/3 | 1/6 | 2/3 |
| 130 | 2/3 | 5/6 | 2/3 | 2/3 | 2/3 | 1/3 | 0   | 2/3 |
| 131 | 2/3 | 5/6 | 5/6 | 2/3 | 2/3 | 1/6 | 0   | 2/3 |
| 132 | 5/6 | 5/6 | 5/6 | 2/3 | 5/6 | 1/6 | 0   | 5/6 |
| 133 | 2/3 | 2/3 | 2/3 | 2/3 | 0   | 0   | 0   | 1/6 |
| 134 | 5/6 | 5/6 | 5/6 | 5/6 | 2/3 | 2/3 | 1/6 | 5/6 |
| 135 | 5/6 | 5/6 | 5/6 | 2/3 | 5/6 | 1/6 | 1/6 | 2/3 |
| 136 | 5/6 | 1   | 1   | 2/3 | 5/6 | 1/3 | 0   | 2/3 |
| 137 | 5/6 | 2/3 | 2/3 | 2/3 | 1/3 | 1/6 | 1/6 | 1/6 |
| 138 | 5/6 | 5/6 | 2/3 | 2/3 | 2/3 | 1/6 | 1/6 | 1/3 |
| 139 | 5/6 | 1   | 5/6 | 1/3 | 5/6 | 2/3 | 0   | 2/3 |
| 140 | 2/3 | 5/6 | 2/3 | 2/3 | 1/3 | 1/6 | 0   | 2/3 |
| 141 | 5/6 | 5/6 | 5/6 | 1/6 | 5/6 | 2/3 | 1/6 | 5/6 |
| 142 | 2/3 | 2/3 | 2/3 | 1/3 | 2/3 | 1/6 | 0   | 2/3 |
| 143 | 1   | 1/3 | 1/3 | 1/3 | 1/6 | 5/6 | 1/6 | 1   |
| 144 | 1   | 5/6 | 5/6 | 5/6 | 2/3 | 5/6 | 0   | 2/3 |
| 145 | 1   | 5/6 | 5/6 | 5/6 | 2/3 | 5/6 | 1/6 | 2/3 |
| 146 | 5/6 | 1   | 5/6 | 5/6 | 2/3 | 5/6 | 0   | 2/3 |
| 147 | 1   | 1   | 2/3 | 1/6 | 5/6 | 2/3 | 1/6 | 1/3 |
| 148 | 5/6 | 5/6 | 5/6 | 1/6 | 2/3 | 2/3 | 1/6 | 1/3 |
| 149 | 1   | 1   | 1   | 5/6 | 2/3 | 2/3 | 0   | 2/3 |
| 150 | 1/2 | 5/6 | 5/6 | 5/6 | 1/2 | 2/3 | 1/2 | 2/3 |
| 151 | 2/3 | 5/6 | 2/3 | 5/6 | 1/2 | 2/3 | 0   | 1/6 |
| 152 | 1/2 | 2/3 | 2/3 | 2/3 | 2/3 | 2/3 | 1/6 | 2/3 |
| 153 | 1   | 1   | 1   | 1   | 1   | 1   | 1/2 | 1   |
| 154 | 1   | 2/3 | 1   | 1   | 2/3 | 2/3 | 1/3 | 5/6 |

Supplementary S4: dEX fractionTable

|     |     |     |     |     |     |     |     |     |
|-----|-----|-----|-----|-----|-----|-----|-----|-----|
| 155 | 5/6 | 5/6 | 2/3 | 1   | 1   | 1   | 0   | 1/2 |
| 156 | 5/6 | 1   | 5/6 | 5/6 | 1   | 5/6 | 0   | 2/3 |
| 157 | 5/6 | 5/6 | 2/3 | 2/3 | 5/6 | 1/3 | 0   | 1/6 |
| 158 | 2/3 | 2/3 | 2/3 | 2/3 | 1/3 | 1/2 | 0   | 1/6 |
| 159 | 5/6 | 5/6 | 5/6 | 5/6 | 5/6 | 1/3 | 0   | 5/6 |
| 160 | 5/6 | 5/6 | 2/3 | 2/3 | 5/6 | 1/3 | 0   | 1/6 |
| 161 | 5/6 | 5/6 | 2/3 | 2/3 | 1   | 5/6 | 0   | 1/2 |
| 162 | 5/6 | 5/6 | 5/6 | 1/3 | 5/6 | 1/6 | 0   | 2/3 |
| 163 | 5/6 | 1   | 2/3 | 2/3 | 1   | 1/6 | 0   | 2/3 |
| 164 | 5/6 | 5/6 | 5/6 | 2/3 | 2/3 | 2/3 | 0   | 1/2 |
| 165 | 5/6 | 5/6 | 1/3 | 1/3 | 5/6 | 1/6 | 0   | 2/3 |
| 166 | 5/6 | 1   | 1   | 1   | 1/2 | 1   | 2/3 | 1   |
| 167 | 2/3 | 2/3 | 1/6 | 1/6 | 2/3 | 1/6 | 0   | 2/3 |
| 168 | 2/3 | 5/6 | 5/6 | 2/3 | 5/6 | 1/6 | 0   | 2/3 |
| 169 | 5/6 | 2/3 | 1/3 | 1/3 | 5/6 | 1/6 | 0   | 2/3 |
| 170 | 1   | 1   | 5/6 | 5/6 | 1   | 1/3 | 1/6 | 2/3 |
| 171 | 5/6 | 5/6 | 5/6 | 2/3 | 1   | 5/6 | 1/3 | 2/3 |
| 172 | 5/6 | 5/6 | 5/6 | 5/6 | 5/6 | 2/3 | 1/6 | 2/3 |
| 173 | 2/3 | 5/6 | 2/3 | 2/3 | 5/6 | 1/6 | 0   | 2/3 |
| 174 | 2/3 | 5/6 | 5/6 | 2/3 | 2/3 | 1/6 | 0   | 2/3 |
| 175 | 5/6 | 5/6 | 5/6 | 1/3 | 5/6 | 1/6 | 0   | 2/3 |
| 176 | 5/6 | 5/6 | 5/6 | 1/3 | 5/6 | 1/6 | 0   | 2/3 |
| 177 | 5/6 | 5/6 | 5/6 | 2/3 | 5/6 | 5/6 | 1/6 | 5/6 |
| 178 | 5/6 | 5/6 | 5/6 | 2/3 | 5/6 | 1/3 | 0   | 5/6 |
| 179 | 5/6 | 5/6 | 5/6 | 2/3 | 5/6 | 5/6 | 1/6 | 5/6 |
| 180 | 5/6 | 5/6 | 5/6 | 1/3 | 2/3 | 1/6 | 0   | 2/3 |
| 181 | 5/6 | 1   | 5/6 | 2/3 | 5/6 | 1/3 | 1/6 | 2/3 |
| 182 | 2/3 | 5/6 | 2/3 | 2/3 | 2/3 | 1/6 | 1/6 | 5/6 |
| 183 | 5/6 | 5/6 | 5/6 | 2/3 | 5/6 | 2/3 | 1/6 | 5/6 |
| 184 | 5/6 | 5/6 | 5/6 | 5/6 | 5/6 | 1/3 | 1/6 | 5/6 |
| 185 | 5/6 | 5/6 | 5/6 | 5/6 | 2/3 | 1/6 | 0   | 1/2 |
| 186 | 1   | 1   | 5/6 | 5/6 | 2/3 | 1/6 | 1/6 | 2/3 |
| 187 | 2/3 | 1/3 | 2/3 | 1/3 | 2/3 | 5/6 | 1/6 | 1/3 |
| 188 | 5/6 | 5/6 | 5/6 | 5/6 | 5/6 | 2/3 | 1/6 | 5/6 |
| 189 | 5/6 | 5/6 | 5/6 | 2/3 | 2/3 | 2/3 | 1/6 | 2/3 |
| 190 | 5/6 | 5/6 | 2/3 | 2/3 | 2/3 | 2/3 | 0   | 2/3 |
| 191 | 1   | 1   | 2/3 | 2/3 | 5/6 | 1/3 | 0   | 2/3 |
| 192 | 2/3 | 2/3 | 2/3 | 2/3 | 2/3 | 1/6 | 1/6 | 1/2 |
| 193 | 1   | 1   | 5/6 | 2/3 | 5/6 | 2/3 | 0   | 5/6 |
| 194 | 5/6 | 5/6 | 2/3 | 2/3 | 2/3 | 1/6 | 0   | 2/3 |
| 195 | 5/6 | 5/6 | 2/3 | 1/3 | 2/3 | 2/3 | 1/6 | 2/3 |
| 196 | 5/6 | 5/6 | 5/6 | 5/6 | 5/6 | 2/3 | 1/6 | 5/6 |
| 197 | 1   | 5/6 | 5/6 | 5/6 | 5/6 | 5/6 | 0   | 5/6 |
| 198 | 5/6 | 5/6 | 5/6 | 1/3 | 2/3 | 2/3 | 1/6 | 2/3 |
| 199 | 5/6 | 5/6 | 5/6 | 5/6 | 5/6 | 5/6 | 0   | 2/3 |
| 200 | 2/3 | 5/6 | 5/6 | 5/6 | 2/3 | 1/6 | 0   | 1/2 |
| 201 | 5/6 | 5/6 | 5/6 | 2/3 | 2/3 | 2/3 | 1/6 | 5/6 |
| 202 | 5/6 | 5/6 | 2/3 | 2/3 | 1/3 | 2/3 | 1/3 | 2/3 |

## Supplementary S4: dEX fractionTable

|     |     |     |     |     |     |     |     |     |
|-----|-----|-----|-----|-----|-----|-----|-----|-----|
| 203 | 5/6 | 5/6 | 5/6 | 2/3 | 1/2 | 1/3 | 1/6 | 2/3 |
| 204 | 2/3 | 5/6 | 2/3 | 2/3 | 2/3 | 1/3 | 0   | 2/3 |
| 205 | 2/3 | 5/6 | 5/6 | 2/3 | 2/3 | 1/6 | 0   | 2/3 |
| 206 | 5/6 | 5/6 | 5/6 | 2/3 | 5/6 | 1/6 | 0   | 5/6 |
| 207 | 2/3 | 2/3 | 2/3 | 2/3 | 0   | 0   | 0   | 1/6 |
| 208 | 5/6 | 5/6 | 5/6 | 5/6 | 2/3 | 2/3 | 1/6 | 5/6 |
| 209 | 5/6 | 5/6 | 5/6 | 2/3 | 5/6 | 1/6 | 1/6 | 2/3 |
| 210 | 5/6 | 1   | 1   | 2/3 | 5/6 | 1/3 | 0   | 2/3 |
| 211 | 5/6 | 2/3 | 2/3 | 2/3 | 1/3 | 1/6 | 1/6 | 1/6 |
| 212 | 5/6 | 5/6 | 2/3 | 2/3 | 2/3 | 1/6 | 1/6 | 1/3 |
| 213 | 5/6 | 1   | 5/6 | 1/3 | 5/6 | 2/3 | 0   | 2/3 |
| 214 | 2/3 | 5/6 | 2/3 | 2/3 | 1/3 | 1/6 | 0   | 2/3 |
| 215 | 5/6 | 5/6 | 5/6 | 1/6 | 5/6 | 2/3 | 1/6 | 5/6 |
| 216 | 2/3 | 2/3 | 2/3 | 1/3 | 2/3 | 1/6 | 0   | 2/3 |

| No. | X(7)Q2 | X(7)Q3 | X(7)Q4 | X(7)Q5 | X(8)Q1 | X(8)Q2 | X(8)Q3 | X(8)Q4 |
|-----|--------|--------|--------|--------|--------|--------|--------|--------|
| 1   | 2/3    | 1/6    | 1/3    | 1/3    | 2/3    | 0      | 1/6    | 0      |
| 2   | 1/2    | 1/2    | 1/2    | 1/2    | 1/2    | 2/3    | 2/3    | 1/2    |
| 3   | 1/6    | 0      | 0      | 0      | 1/2    | 1/6    | 1/6    | 1/6    |
| 4   | 1/3    | 1/3    | 1/6    | 1/6    | 1/2    | 1/3    | 1/6    | 1/3    |
| 5   | 1      | 2/3    | 5/6    | 2/3    | 1      | 1/2    | 1/6    | 2/3    |
| 6   | 1/2    | 1/3    | 0      | 0      | 1      | 1/2    | 1/3    | 1/2    |
| 7   | 1/6    | 1/3    | 1/6    | 1/3    | 1      | 1/3    | 1/3    | 1/6    |
| 8   | 1/6    | 0      | 0      | 0      | 2/3    | 0      | 0      | 2/3    |
| 9   | 1/6    | 0      | 0      | 0      | 1/3    | 0      | 1/6    | 1/3    |
| 10  | 0      | 0      | 0      | 0      | 1/6    | 0      | 0      | 1/6    |
| 11  | 1/6    | 0      | 0      | 0      | 1/3    | 0      | 1/6    | 0      |
| 12  | 1/6    | 1/6    | 0      | 0      | 1/3    | 0      | 1/6    | 1/6    |
| 13  | 1/6    | 1/3    | 1/3    | 1/6    | 1      | 1/3    | 1/3    | 1/6    |
| 14  | 1/6    | 0      | 0      | 0      | 2/3    | 1/6    | 1/6    | 1/6    |
| 15  | 1/6    | 0      | 1/6    | 0      | 2/3    | 0      | 1/6    | 1/6    |
| 16  | 1/6    | 1/6    | 0      | 1/6    | 1/6    | 1/6    | 1/3    | 1/2    |
| 17  | 1/6    | 0      | 0      | 0      | 1/6    | 0      | 1/3    | 1/3    |
| 18  | 2/3    | 0      | 0      | 0      | 1      | 5/6    | 5/6    | 0      |
| 19  | 1/6    | 1/6    | 1/6    | 1/6    | 1/6    | 0      | 1/6    | 1/6    |
| 20  | 1/6    | 0      | 0      | 0      | 1/3    | 0      | 1/3    | 2/3    |
| 21  | 1/6    | 1/6    | 1/6    | 1/6    | 1/3    | 0      | 1/6    | 1/6    |
| 22  | 1/3    | 1/6    | 1/6    | 1/3    | 5/6    | 1/3    | 2/3    | 1/3    |
| 23  | 1/6    | 1/6    | 1/6    | 1/6    | 2/3    | 1/6    | 2/3    | 1/3    |
| 24  | 1/6    | 1/6    | 1/6    | 1/6    | 2/3    | 1/3    | 1/3    | 1/3    |
| 25  | 1/6    | 1/6    | 1/6    | 0      | 2/3    | 1/6    | 1/3    | 1/3    |
| 26  | 1/6    | 1/6    | 1/6    | 1/6    | 2/3    | 1/6    | 1/3    | 2/3    |
| 27  | 1/6    | 1/6    | 1/6    | 1/6    | 2/3    | 1/6    | 1/6    | 1/3    |
| 28  | 1/3    | 1/6    | 1/6    | 1/6    | 5/6    | 1/3    | 1/3    | 1/3    |
| 29  | 1/6    | 1/6    | 1/6    | 1/6    | 1      | 1/3    | 2/3    | 1/3    |
| 30  | 1/6    | 1/6    | 1/6    | 1/3    | 5/6    | 1/3    | 1/3    | 1/3    |
| 31  | 1/3    | 1/6    | 1/6    | 1/6    | 5/6    | 0      | 1/3    | 1/6    |



Supplementary S4: dEX fractionTable

|    |     |     |     |     |     |     |     |     |
|----|-----|-----|-----|-----|-----|-----|-----|-----|
| 32 | 1/6 | 1/6 | 1/6 | 1/6 | 1/3 | 1/6 | 1/6 | 1/3 |
| 33 | 1/6 | 1/6 | 0   | 0   | 2/3 | 0   | 1/3 | 1/3 |
| 34 | 1/3 | 1/6 | 0   | 0   | 2/3 | 1/6 | 1/6 | 1/3 |
| 35 | 1/3 | 1/3 | 1/6 | 1/3 | 5/6 | 0   | 1/3 | 2/3 |
| 36 | 1/3 | 1/6 | 0   | 0   | 5/6 | 1/6 | 1/6 | 1/3 |
| 37 | 1/2 | 1/2 | 1/2 | 1/2 | 1/6 | 0   | 0   | 1/6 |
| 38 | 1/6 | 0   | 0   | 0   | 2/3 | 0   | 0   | 1/6 |
| 39 | 0   | 5/6 | 5/6 | 5/6 | 1   | 1/3 | 1/3 | 5/6 |
| 40 | 1/6 | 1/6 | 1/6 | 1/6 | 5/6 | 1/6 | 2/3 | 1/3 |
| 41 | 0   | 0   | 1/3 | 1/3 | 5/6 | 1/6 | 1/3 | 2/3 |
| 42 | 1/6 | 1/6 | 1/3 | 1/3 | 5/6 | 0   | 1/6 | 1/3 |
| 43 | 0   | 2/3 | 1/6 | 1/3 | 2/3 | 0   | 1/6 | 1/3 |
| 44 | 1/2 | 1/6 | 1/6 | 1/6 | 1/3 | 1/6 | 1/6 | 1/6 |
| 45 | 1/3 | 1/6 | 1/6 | 2/3 | 2/3 | 1/6 | 1/6 | 1/3 |
| 46 | 1/6 | 1/6 | 1/6 | 1/6 | 2/3 | 1/6 | 1/6 | 1/6 |
| 47 | 1/6 | 1/6 | 0   | 0   | 5/6 | 1/6 | 1/6 | 1/3 |
| 48 | 1/3 | 2/3 | 2/3 | 1/6 | 5/6 | 1/6 | 2/3 | 2/3 |
| 49 | 1/6 | 1/6 | 1/6 | 1/6 | 5/6 | 1/6 | 2/3 | 2/3 |
| 50 | 1/6 | 1/6 | 1/6 | 1/6 | 2/3 | 1/6 | 1/6 | 2/3 |
| 51 | 0   | 0   | 0   | 0   | 2/3 | 0   | 1/3 | 2/3 |
| 52 | 1/2 | 1/2 | 1/2 | 1/2 | 1/3 | 1/6 | 1/6 | 1/2 |
| 53 | 1/6 | 1/6 | 1/6 | 2/3 | 5/6 | 1/6 | 1/3 | 2/3 |
| 54 | 1/3 | 1/6 | 0   | 2/3 | 2/3 | 0   | 1/6 | 1/3 |
| 55 | 1/6 | 1/6 | 1/6 | 1/6 | 5/6 | 0   | 1/3 | 2/3 |
| 56 | 1/6 | 1/6 | 1/6 | 1/6 | 2/3 | 1/6 | 1/6 | 1/3 |
| 57 | 0   | 0   | 0   | 0   | 5/6 | 0   | 1/6 | 1/3 |
| 58 | 1/6 | 1/6 | 1/6 | 1/3 | 5/6 | 0   | 1/6 | 1/6 |
| 59 | 1/6 | 1/6 | 1/6 | 1/6 | 1/6 | 0   | 0   | 1/6 |
| 60 | 1/3 | 1/3 | 1/6 | 1/6 | 2/3 | 1/6 | 1/6 | 2/3 |
| 61 | 1/3 | 1/6 | 0   | 1/3 | 2/3 | 0   | 0   | 1/6 |
| 62 | 0   | 0   | 0   | 0   | 2/3 | 0   | 1/6 | 2/3 |
| 63 | 1/6 | 1/6 | 1/6 | 1/6 | 1/3 | 1/6 | 1/6 | 1/2 |
| 64 | 1/6 | 0   | 0   | 0   | 1/3 | 0   | 0   | 1/3 |
| 65 | 1/6 | 1/6 | 0   | 2/3 | 2/3 | 0   | 1/6 | 1/3 |
| 66 | 1/6 | 1/6 | 1/6 | 1/6 | 1/6 | 1/6 | 1/6 | 2/3 |
| 67 | 1/3 | 1/6 | 1/6 | 1/6 | 2/3 | 0   | 1/6 | 2/3 |
| 68 | 1/6 | 1/6 | 1/6 | 2/3 | 1/6 | 0   | 0   | 2/3 |
| 69 | 5/6 | 1   | 1   | 1   | 0   | 1/6 | 0   | 1   |
| 70 | 1/6 | 1/3 | 1/6 | 1/3 | 5/6 | 1/6 | 5/6 | 1/3 |
| 71 | 1/6 | 1/3 | 1/6 | 1/3 | 5/6 | 0   | 2/3 | 1/3 |
| 72 | 1/6 | 2/3 | 1/6 | 1/3 | 5/6 | 1/6 | 2/3 | 1/3 |
| 73 | 0   | 1/6 | 1/6 | 1/3 | 5/6 | 0   | 1/3 | 1/3 |
| 74 | 0   | 1/6 | 1/6 | 1/6 | 5/6 | 0   | 1/6 | 5/6 |
| 75 | 2/3 | 1/6 | 1/3 | 1/3 | 2/3 | 0   | 1/6 | 0   |
| 76 | 1/2 | 1/2 | 1/2 | 1/2 | 1/2 | 2/3 | 2/3 | 1/2 |
| 77 | 1/6 | 0   | 0   | 0   | 1/2 | 1/6 | 1/6 | 1/6 |
| 78 | 1/3 | 1/3 | 1/6 | 1/6 | 1/2 | 1/3 | 1/6 | 1/3 |
| 79 | 1   | 2/3 | 5/6 | 2/3 | 1   | 1/2 | 1/6 | 2/3 |

## Supplementary S4: dEX fractionTable

|     |     |     |     |     |     |     |     |     |
|-----|-----|-----|-----|-----|-----|-----|-----|-----|
| 80  | 1/2 | 1/3 | 0   | 0   | 1   | 1/2 | 1/3 | 1/2 |
| 81  | 1/6 | 1/3 | 1/6 | 1/3 | 1   | 1/3 | 1/3 | 1/6 |
| 82  | 1/6 | 0   | 0   | 0   | 2/3 | 0   | 0   | 2/3 |
| 83  | 1/6 | 0   | 0   | 0   | 1/3 | 0   | 1/6 | 1/3 |
| 84  | 0   | 0   | 0   | 0   | 1/6 | 0   | 0   | 1/6 |
| 85  | 1/6 | 0   | 0   | 0   | 1/3 | 0   | 1/6 | 0   |
| 86  | 1/6 | 1/6 | 0   | 0   | 1/3 | 0   | 1/6 | 1/6 |
| 87  | 1/6 | 1/3 | 1/3 | 1/6 | 1   | 1/3 | 1/3 | 1/6 |
| 88  | 1/6 | 0   | 0   | 0   | 2/3 | 1/6 | 1/6 | 1/6 |
| 89  | 1/6 | 0   | 1/6 | 0   | 2/3 | 0   | 1/6 | 1/6 |
| 90  | 1/6 | 1/6 | 0   | 1/6 | 1/6 | 1/6 | 1/3 | 1/2 |
| 91  | 1/6 | 0   | 0   | 0   | 1/6 | 0   | 1/3 | 1/3 |
| 92  | 2/3 | 0   | 0   | 0   | 1   | 5/6 | 5/6 | 0   |
| 93  | 1/6 | 1/6 | 1/6 | 1/6 | 1/6 | 0   | 1/6 | 1/6 |
| 94  | 1/6 | 0   | 0   | 0   | 1/3 | 0   | 1/3 | 2/3 |
| 95  | 1/6 | 1/6 | 1/6 | 1/6 | 1/3 | 0   | 1/6 | 1/6 |
| 96  | 1/3 | 1/6 | 1/6 | 1/3 | 5/6 | 1/3 | 2/3 | 1/3 |
| 97  | 1/6 | 1/6 | 1/6 | 1/6 | 2/3 | 1/6 | 2/3 | 1/3 |
| 98  | 1/6 | 1/6 | 1/6 | 1/6 | 2/3 | 1/3 | 1/3 | 1/3 |
| 99  | 1/6 | 1/6 | 1/6 | 0   | 2/3 | 1/6 | 1/3 | 1/3 |
| 100 | 1/6 | 1/6 | 1/6 | 1/6 | 2/3 | 1/6 | 1/3 | 2/3 |
| 101 | 1/6 | 1/6 | 1/6 | 1/6 | 2/3 | 1/6 | 1/6 | 1/3 |
| 102 | 1/3 | 1/6 | 1/6 | 1/6 | 5/6 | 1/3 | 1/3 | 1/3 |
| 103 | 1/6 | 1/6 | 1/6 | 1/6 | 1   | 1/3 | 2/3 | 1/3 |
| 104 | 1/6 | 1/6 | 1/6 | 1/3 | 5/6 | 1/3 | 1/3 | 1/3 |
| 105 | 1/3 | 1/6 | 1/6 | 1/6 | 5/6 | 0   | 1/3 | 1/6 |
| 106 | 1/6 | 1/6 | 1/6 | 1/6 | 1/3 | 1/6 | 1/6 | 1/3 |
| 107 | 1/6 | 1/6 | 0   | 0   | 2/3 | 0   | 1/3 | 1/3 |
| 108 | 1/3 | 1/6 | 0   | 0   | 2/3 | 1/6 | 1/6 | 1/3 |
| 109 | 1/3 | 1/3 | 1/6 | 1/3 | 5/6 | 0   | 1/3 | 2/3 |
| 110 | 1/3 | 1/6 | 0   | 0   | 5/6 | 1/6 | 1/6 | 1/3 |
| 111 | 1/2 | 1/2 | 1/2 | 1/2 | 1/6 | 0   | 0   | 1/6 |
| 112 | 1/6 | 0   | 0   | 0   | 2/3 | 0   | 0   | 1/6 |
| 113 | 0   | 5/6 | 5/6 | 5/6 | 1   | 1/3 | 1/3 | 5/6 |
| 114 | 1/6 | 1/6 | 1/6 | 1/6 | 5/6 | 1/6 | 2/3 | 1/3 |
| 115 | 0   | 0   | 1/3 | 1/3 | 5/6 | 1/6 | 1/3 | 2/3 |
| 116 | 1/6 | 1/6 | 1/3 | 1/3 | 5/6 | 0   | 1/6 | 1/3 |
| 117 | 0   | 2/3 | 1/6 | 1/3 | 2/3 | 0   | 1/6 | 1/3 |
| 118 | 1/2 | 1/6 | 1/6 | 1/6 | 1/3 | 1/6 | 1/6 | 1/6 |
| 119 | 1/3 | 1/6 | 1/6 | 2/3 | 2/3 | 1/6 | 1/6 | 1/3 |
| 120 | 1/6 | 1/6 | 1/6 | 1/6 | 2/3 | 1/6 | 1/6 | 1/6 |
| 121 | 1/6 | 1/6 | 0   | 0   | 5/6 | 1/6 | 1/6 | 1/3 |
| 122 | 1/3 | 2/3 | 2/3 | 1/6 | 5/6 | 1/6 | 2/3 | 2/3 |
| 123 | 1/6 | 1/6 | 1/6 | 1/6 | 5/6 | 1/6 | 2/3 | 2/3 |
| 124 | 1/6 | 1/6 | 1/6 | 1/6 | 2/3 | 1/6 | 1/6 | 2/3 |
| 125 | 0   | 0   | 0   | 0   | 2/3 | 0   | 1/3 | 2/3 |
| 126 | 1/2 | 1/2 | 1/2 | 1/2 | 1/3 | 1/6 | 1/6 | 1/2 |
| 127 | 1/6 | 1/6 | 1/6 | 2/3 | 5/6 | 1/6 | 1/3 | 2/3 |

## Supplementary S4: dEX fractionTable

|     |     |     |     |     |     |     |     |     |
|-----|-----|-----|-----|-----|-----|-----|-----|-----|
| 128 | 1/3 | 1/6 | 0   | 2/3 | 2/3 | 0   | 1/6 | 1/3 |
| 129 | 1/6 | 1/6 | 1/6 | 1/6 | 5/6 | 0   | 1/3 | 2/3 |
| 130 | 1/6 | 1/6 | 1/6 | 1/6 | 2/3 | 1/6 | 1/6 | 1/3 |
| 131 | 0   | 0   | 0   | 0   | 5/6 | 0   | 1/6 | 1/3 |
| 132 | 1/6 | 1/6 | 1/6 | 1/3 | 5/6 | 0   | 1/6 | 1/6 |
| 133 | 1/6 | 1/6 | 1/6 | 1/6 | 1/6 | 0   | 0   | 1/6 |
| 134 | 1/3 | 1/3 | 1/6 | 1/6 | 2/3 | 1/6 | 1/6 | 2/3 |
| 135 | 1/3 | 1/6 | 0   | 1/3 | 2/3 | 0   | 0   | 1/6 |
| 136 | 0   | 0   | 0   | 0   | 2/3 | 0   | 1/6 | 2/3 |
| 137 | 1/6 | 1/6 | 1/6 | 1/6 | 1/3 | 1/6 | 1/6 | 1/2 |
| 138 | 1/6 | 0   | 0   | 0   | 1/3 | 0   | 0   | 1/3 |
| 139 | 1/6 | 1/6 | 0   | 2/3 | 2/3 | 0   | 1/6 | 1/3 |
| 140 | 1/6 | 1/6 | 1/6 | 1/6 | 1/6 | 1/6 | 1/6 | 2/3 |
| 141 | 1/3 | 1/6 | 1/6 | 1/6 | 2/3 | 0   | 1/6 | 2/3 |
| 142 | 1/6 | 1/6 | 1/6 | 2/3 | 1/6 | 0   | 0   | 2/3 |
| 143 | 5/6 | 1   | 1   | 1   | 0   | 1/6 | 0   | 1   |
| 144 | 1/6 | 1/3 | 1/6 | 1/3 | 5/6 | 1/6 | 5/6 | 1/3 |
| 145 | 1/6 | 1/3 | 1/6 | 1/3 | 5/6 | 0   | 2/3 | 1/3 |
| 146 | 1/6 | 2/3 | 1/6 | 1/3 | 5/6 | 1/6 | 2/3 | 1/3 |
| 147 | 0   | 1/6 | 1/6 | 1/3 | 5/6 | 0   | 1/3 | 1/3 |
| 148 | 0   | 1/6 | 1/6 | 1/6 | 5/6 | 0   | 1/6 | 5/6 |
| 149 | 2/3 | 1/6 | 1/3 | 1/3 | 2/3 | 0   | 1/6 | 0   |
| 150 | 1/2 | 1/2 | 1/2 | 1/2 | 1/2 | 2/3 | 2/3 | 1/2 |
| 151 | 1/6 | 0   | 0   | 0   | 1/2 | 1/6 | 1/6 | 1/6 |
| 152 | 1/3 | 1/3 | 1/6 | 1/6 | 1/2 | 1/3 | 1/6 | 1/3 |
| 153 | 1   | 2/3 | 5/6 | 2/3 | 1   | 1/2 | 1/6 | 2/3 |
| 154 | 1/2 | 1/3 | 0   | 0   | 1   | 1/2 | 1/3 | 1/2 |
| 155 | 1/6 | 1/3 | 1/6 | 1/3 | 1   | 1/3 | 1/3 | 1/6 |
| 156 | 1/6 | 0   | 0   | 0   | 2/3 | 0   | 0   | 2/3 |
| 157 | 1/6 | 0   | 0   | 0   | 1/3 | 0   | 1/6 | 1/3 |
| 158 | 0   | 0   | 0   | 0   | 1/6 | 0   | 0   | 1/6 |
| 159 | 1/6 | 0   | 0   | 0   | 1/3 | 0   | 1/6 | 0   |
| 160 | 1/6 | 1/6 | 0   | 0   | 1/3 | 0   | 1/6 | 1/6 |
| 161 | 1/6 | 1/3 | 1/3 | 1/6 | 1   | 1/3 | 1/3 | 1/6 |
| 162 | 1/6 | 0   | 0   | 0   | 2/3 | 1/6 | 1/6 | 1/6 |
| 163 | 1/6 | 0   | 1/6 | 0   | 2/3 | 0   | 1/6 | 1/6 |
| 164 | 1/6 | 1/6 | 0   | 1/6 | 1/6 | 1/6 | 1/3 | 1/2 |
| 165 | 1/6 | 0   | 0   | 0   | 1/6 | 0   | 1/3 | 1/3 |
| 166 | 2/3 | 0   | 0   | 0   | 1   | 5/6 | 5/6 | 0   |
| 167 | 1/6 | 1/6 | 1/6 | 1/6 | 1/6 | 0   | 1/6 | 1/6 |
| 168 | 1/6 | 0   | 0   | 0   | 1/3 | 0   | 1/3 | 2/3 |
| 169 | 1/6 | 1/6 | 1/6 | 1/6 | 1/3 | 0   | 1/6 | 1/6 |
| 170 | 1/3 | 1/6 | 1/6 | 1/3 | 5/6 | 1/3 | 2/3 | 1/3 |
| 171 | 1/6 | 1/6 | 1/6 | 1/6 | 2/3 | 1/6 | 2/3 | 1/3 |
| 172 | 1/6 | 1/6 | 1/6 | 1/6 | 2/3 | 1/3 | 1/3 | 1/3 |
| 173 | 1/6 | 1/6 | 1/6 | 0   | 2/3 | 1/6 | 1/3 | 1/3 |
| 174 | 1/6 | 1/6 | 1/6 | 1/6 | 2/3 | 1/6 | 1/3 | 2/3 |
| 175 | 1/6 | 1/6 | 1/6 | 1/6 | 2/3 | 1/6 | 1/6 | 1/3 |

Supplementary S4: dEX fractionTable

|     |     |     |     |     |     |     |     |     |
|-----|-----|-----|-----|-----|-----|-----|-----|-----|
| 176 | 1/3 | 1/6 | 1/6 | 1/6 | 5/6 | 1/3 | 1/3 | 1/3 |
| 177 | 1/6 | 1/6 | 1/6 | 1/6 | 1   | 1/3 | 2/3 | 1/3 |
| 178 | 1/6 | 1/6 | 1/6 | 1/3 | 5/6 | 1/3 | 1/3 | 1/3 |
| 179 | 1/3 | 1/6 | 1/6 | 1/6 | 5/6 | 0   | 1/3 | 1/6 |
| 180 | 1/6 | 1/6 | 1/6 | 1/6 | 1/3 | 1/6 | 1/6 | 1/3 |
| 181 | 1/6 | 1/6 | 0   | 0   | 2/3 | 0   | 1/3 | 1/3 |
| 182 | 1/3 | 1/6 | 0   | 0   | 2/3 | 1/6 | 1/6 | 1/3 |
| 183 | 1/3 | 1/3 | 1/6 | 1/3 | 5/6 | 0   | 1/3 | 2/3 |
| 184 | 1/3 | 1/6 | 0   | 0   | 5/6 | 1/6 | 1/6 | 1/3 |
| 185 | 1/2 | 1/2 | 1/2 | 1/2 | 1/6 | 0   | 0   | 1/6 |
| 186 | 1/6 | 0   | 0   | 0   | 2/3 | 0   | 0   | 1/6 |
| 187 | 0   | 5/6 | 5/6 | 5/6 | 1   | 1/3 | 1/3 | 5/6 |
| 188 | 1/6 | 1/6 | 1/6 | 1/6 | 5/6 | 1/6 | 2/3 | 1/3 |
| 189 | 0   | 0   | 1/3 | 1/3 | 5/6 | 1/6 | 1/3 | 2/3 |
| 190 | 1/6 | 1/6 | 1/3 | 1/3 | 5/6 | 0   | 1/6 | 1/3 |
| 191 | 0   | 2/3 | 1/6 | 1/3 | 2/3 | 0   | 1/6 | 1/3 |
| 192 | 1/2 | 1/6 | 1/6 | 1/6 | 1/3 | 1/6 | 1/6 | 1/6 |
| 193 | 1/3 | 1/6 | 1/6 | 2/3 | 2/3 | 1/6 | 1/6 | 1/3 |
| 194 | 1/6 | 1/6 | 1/6 | 1/6 | 2/3 | 1/6 | 1/6 | 1/6 |
| 195 | 1/6 | 1/6 | 0   | 0   | 5/6 | 1/6 | 1/6 | 1/3 |
| 196 | 1/3 | 2/3 | 2/3 | 1/6 | 5/6 | 1/6 | 2/3 | 2/3 |
| 197 | 1/6 | 1/6 | 1/6 | 1/6 | 5/6 | 1/6 | 2/3 | 2/3 |
| 198 | 1/6 | 1/6 | 1/6 | 1/6 | 2/3 | 1/6 | 1/6 | 2/3 |
| 199 | 0   | 0   | 0   | 0   | 2/3 | 0   | 1/3 | 2/3 |
| 200 | 1/2 | 1/2 | 1/2 | 1/2 | 1/3 | 1/6 | 1/6 | 1/2 |
| 201 | 1/6 | 1/6 | 1/6 | 2/3 | 5/6 | 1/6 | 1/3 | 2/3 |
| 202 | 1/3 | 1/6 | 0   | 2/3 | 2/3 | 0   | 1/6 | 1/3 |
| 203 | 1/6 | 1/6 | 1/6 | 1/6 | 5/6 | 0   | 1/3 | 2/3 |
| 204 | 1/6 | 1/6 | 1/6 | 1/6 | 2/3 | 1/6 | 1/6 | 1/3 |
| 205 | 0   | 0   | 0   | 0   | 5/6 | 0   | 1/6 | 1/3 |
| 206 | 1/6 | 1/6 | 1/6 | 1/3 | 5/6 | 0   | 1/6 | 1/6 |
| 207 | 1/6 | 1/6 | 1/6 | 1/6 | 1/6 | 0   | 0   | 1/6 |
| 208 | 1/3 | 1/3 | 1/6 | 1/6 | 2/3 | 1/6 | 1/6 | 2/3 |
| 209 | 1/3 | 1/6 | 0   | 1/3 | 2/3 | 0   | 0   | 1/6 |
| 210 | 0   | 0   | 0   | 0   | 2/3 | 0   | 1/6 | 2/3 |
| 211 | 1/6 | 1/6 | 1/6 | 1/6 | 1/3 | 1/6 | 1/6 | 1/2 |
| 212 | 1/6 | 0   | 0   | 0   | 1/3 | 0   | 0   | 1/3 |
| 213 | 1/6 | 1/6 | 0   | 2/3 | 2/3 | 0   | 1/6 | 1/3 |
| 214 | 1/6 | 1/6 | 1/6 | 1/6 | 1/6 | 1/6 | 1/6 | 2/3 |
| 215 | 1/3 | 1/6 | 1/6 | 1/6 | 2/3 | 0   | 1/6 | 2/3 |
| 216 | 1/6 | 1/6 | 1/6 | 2/3 | 1/6 | 0   | 0   | 2/3 |
